# Supplementary material for: The effect of alcohols as vehicles on the percutaneous absorption and skin retention of ibuprofen modified with l-valine alkyl esters
Source: Royal Society of Chemistry journal article supplement (doi:10.1039/d0ra06567f), 2020-01-01
Supplement: d0ra06567f1.pdf [file d0ra06567f1.pdf]

## ELECTRONIC SUPPORTING INFORMATION

### The effect of alcohols as vehicles on the percutaneous absorption and skin retention of ibuprofen modified with L-valine alkyl esters

*Paula Ossowicz<sup>a\*</sup>, Joanna Klebeka<sup>a</sup>, Ewa Janus<sup>a</sup>, Anna Nowak<sup>b</sup>, Wiktoria Duchnik<sup>b</sup>, Łukasz Kucharski<sup>b</sup>, and Adam Klimowicz<sup>b</sup>*

<sup>a</sup> *West Pomeranian University of Technology, Szczecin, Faculty of Chemical Technology and Engineering, Department of Chemical Organic Technology and Polymeric Materials, Piastów Ave. 42, 71-065 Szczecin, Poland*

<sup>b</sup> *Pomeranian Medical University in Szczecin, Department of Cosmetic and Pharmaceutical Chemistry, Powstańców*

*\*Corresponding author at: West Pomeranian University of Technology, Piastów Ave. 42, 71-065 Szczecin, Poland, Tel: +48914494801. E-mail: possowicz@zut.edu.pl;*

Number of pages: 58

Number of figures: 65

Number of tables: 7

## Table of Contents

|                                                                           |     |
|---------------------------------------------------------------------------|-----|
| SPECTRAL ANALYSIS & IDENTIFICATION OF COMPOUND                            | S2  |
| L-valine alkyl ester hydrochlorides                                       | S2  |
| L-valine alkyl ester                                                      | S11 |
| L-valine alkyl ester ibuprofenate                                         | S20 |
| COLLECTED DATA                                                            | S31 |
| The cumulative mass of compound in skin after 24 hours of permeation      | S31 |
| Statistical data analysis                                                 | S33 |
| Diffusing through pig skin from alcoholic solutions of analyzed compounds | S37 |

# SPECTRAL ANALYSIS, IDENTIFICATION & CHARACTERISATION OF COMPOUNDS

## L-VALINE ALKYL ESTER HYDROCHLORIDES

**Table S1.** Amounts of substrates and yields of synthesis of L-valine alkyl ester hydrochlorides (ValOR·HCl)

| No. | Compound     | Substrate      |            | Product         |           |             |
|-----|--------------|----------------|------------|-----------------|-----------|-------------|
|     |              | Amino acid [g] | TMSCl [mL] | L-ValOR·HCl [g] | Yield [%] | State       |
| 1   | ValOMe·HCl   | 5.17           | 11.20      | 7.29            | 98        | white solid |
| 2   | ValOHept·HCl | 5.34           | 11.56      | 10.47           | 91        | white solid |
| 3   | ValOOkt·HCl  | 5.47           | 11.85      | 11.06           | 89        | white solid |

### ValOMe·HCl– L-valine methyl ester hydrochloride

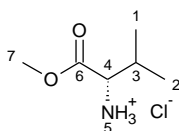

Compound was obtained according general procedure and the reaction yielded 7.29 g of ValOMe·HCl (98.5%) as white solid. <sup>1</sup>H NMR (400 MHz, CDCl<sub>3</sub>) δ in ppm:

8.82 (s, 3H, H<sub>5</sub>); 3.99 (d, 1H, J<sub>4,3</sub>=4.9 Hz, H<sub>4</sub>); 3.83 (s, 3H, H<sub>7</sub>); 2.46-2.50 (m, 1H, H<sub>3</sub>); 1.14 (dd, 6H, H<sub>2</sub>, H<sub>1</sub>); <sup>13</sup>C NMR (100 MHz, CDCl<sub>3</sub>) δ in ppm: 168.92 (C<sub>6</sub>); 58.64 (C<sub>4</sub>); 52.93 (C<sub>7</sub>); 29.87 (C<sub>3</sub>); 18.45 (C<sub>2</sub>) 18.29 (C<sub>1</sub>); **FT-IR:** ν (ATR): 2969; 2886; 2675; 1739; 1699; 1679; 1592; 1504; 1465; 1437; 1399; 1378; 1355; 1293; 1241; 1158; 1140; 1070; 1020; 975; 928; 880; 770; 753; 664; 520; 480; 426 cm<sup>-1</sup>; **UV-Vis** (EtOH): λ<sub>max</sub>= 202.4 nm; **Elemental analysis:** Calc. (%) for C<sub>6</sub>H<sub>14</sub>NO<sub>2</sub>Cl (167.640 g/mol) C (42.99), H (8.42), N (8.36), O (19.09), Found C (42.90), H (8.38), N (8.35), O (19.09); **T<sub>m</sub>**=164.8-172.4°C; [α]<sub>D</sub><sup>20</sup> = +24.628 (c=0.605 g/100 cm<sup>3</sup> EtOH).

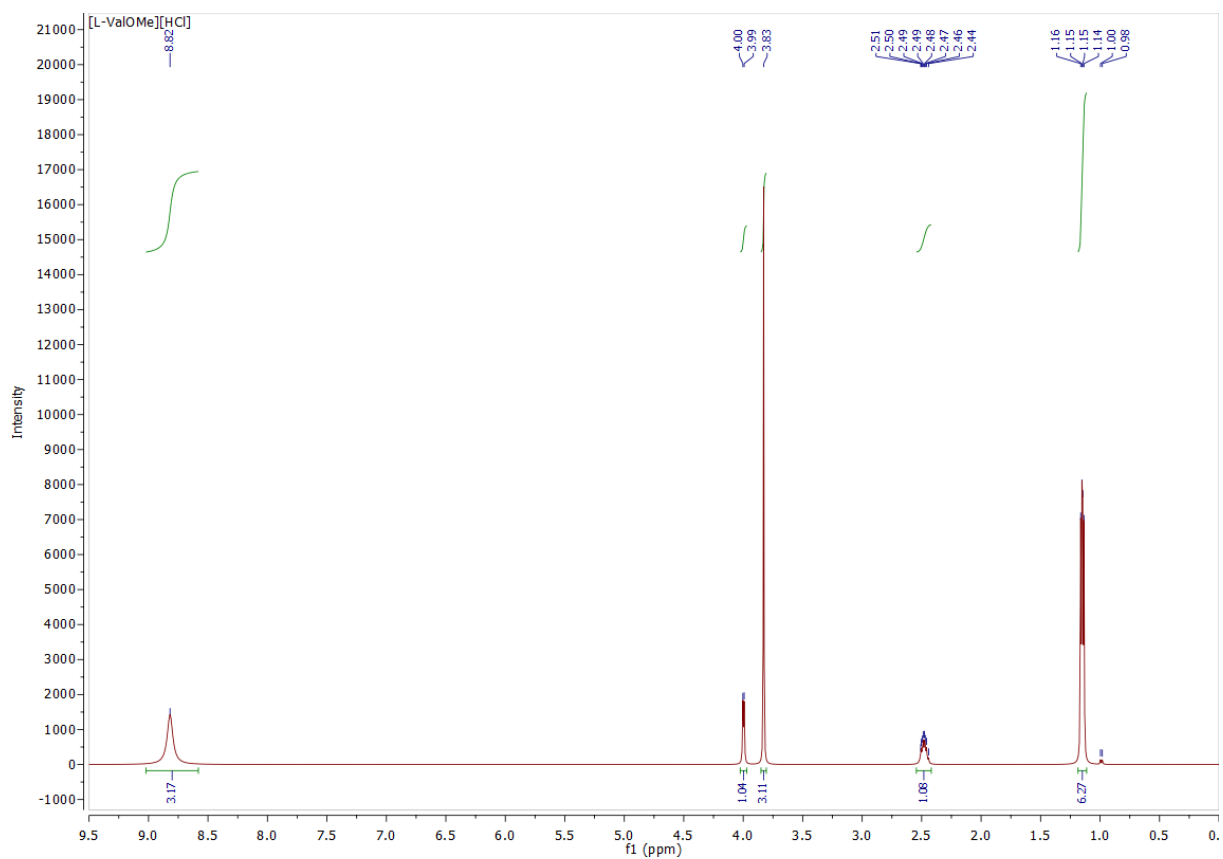

**Figure S1.**  $^1\text{H}$  NMR spectra of L-valine methyl ester hydrochloride

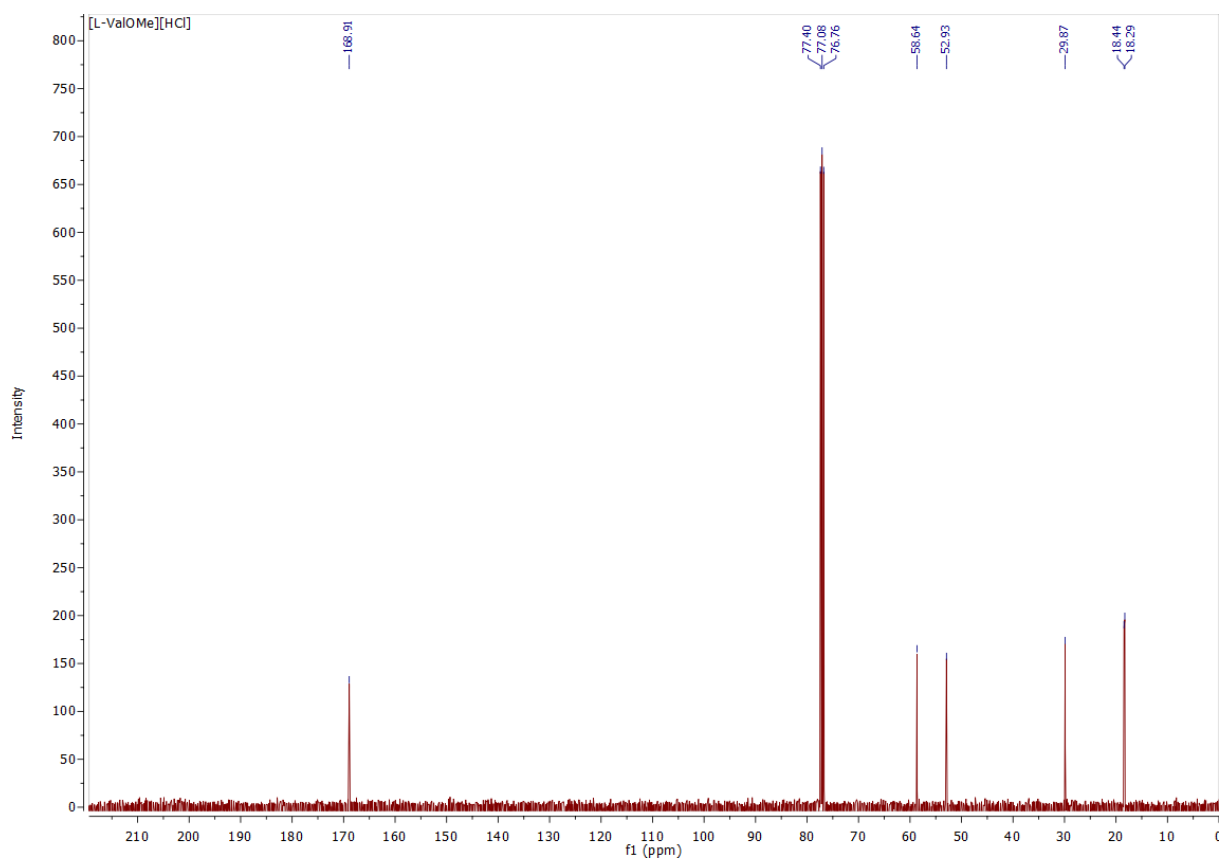

**Figure S2.**  $^{13}\text{C}$  NMR spectra of L-valine methyl ester hydrochloride

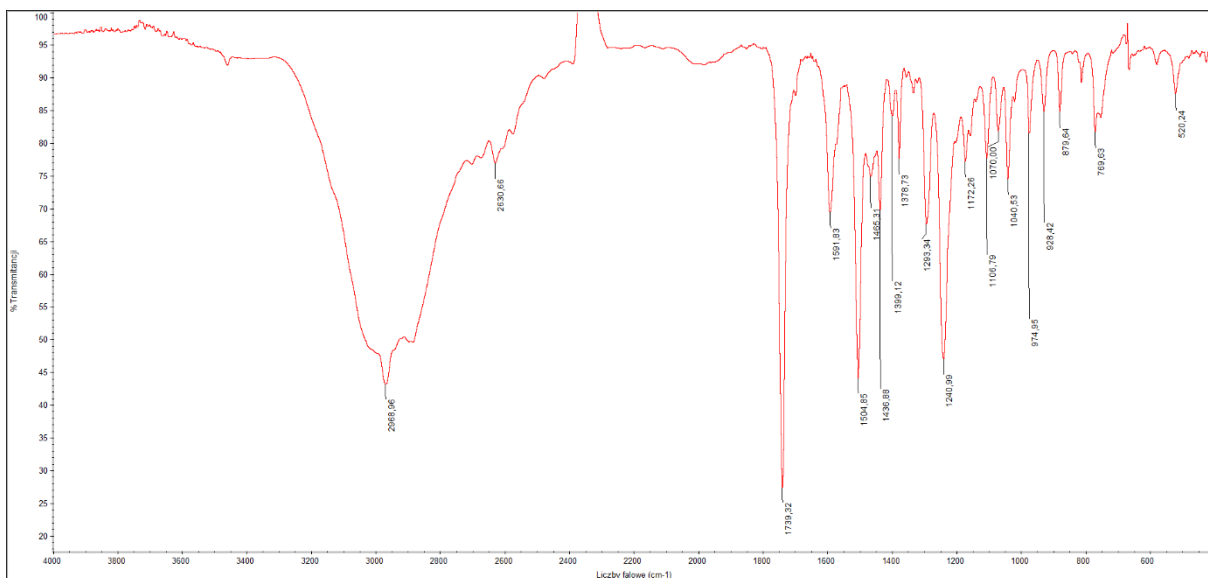

**Figure S3.** FTIR spectra of L-valine methyl ester hydrochloride

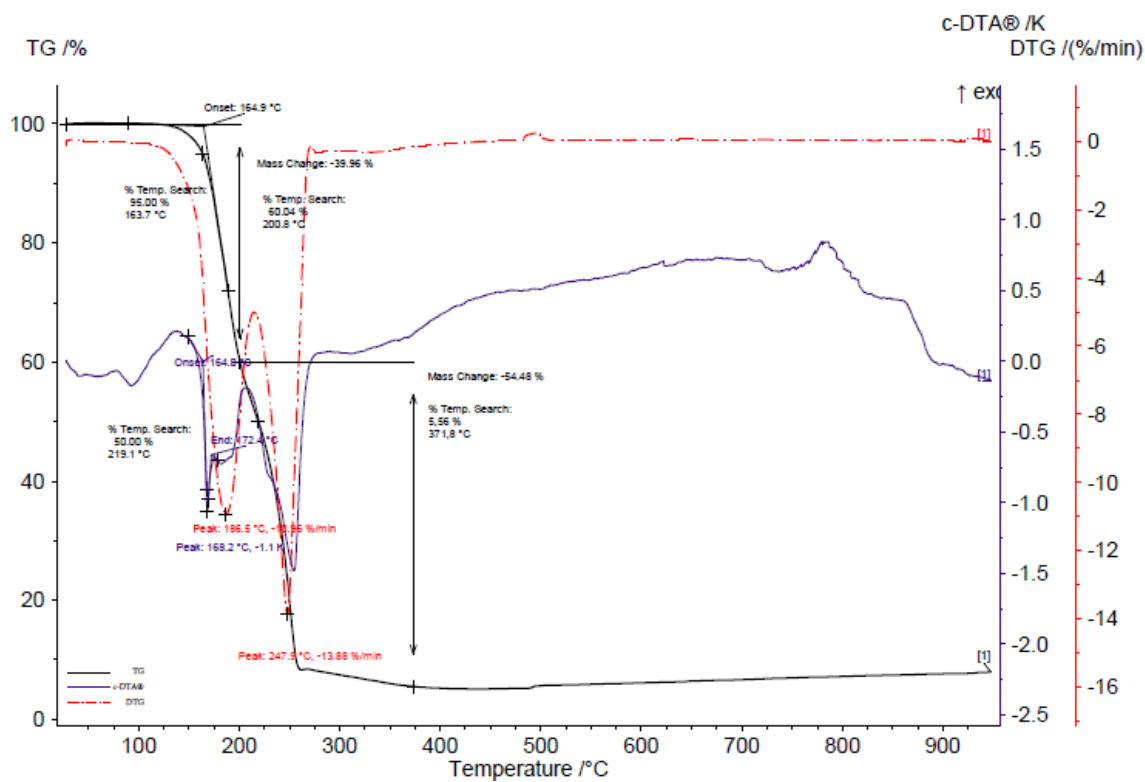

**Figure S4.** The TG, DTG and c-DTA curves of L-valine methyl ester hydrochloride

## ValOHept·HCl – L-valine heptyl ester hydrochloride

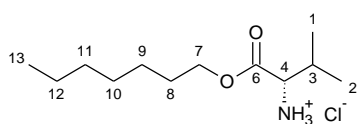

The compound was obtained according to general procedure and the reaction yielded 10.47 g of ValOHept·HCl (91.0%) as yellow solid.  $^1\text{H NMR}$  (400

MHz,  $\text{CDCl}_3$ )  $\delta$  in ppm: 8.76 (s, 3H, H5); 4.13-4.27 (m, 2H, H7); 3.96 (d, 1H,  $J_{4,3}=3.9$  Hz, H4); 2.44-2.52 (m, 1H, H3); 1.60-1.71 (m, 2H, H8); 1.28-1.38 (m, 8H, H9, H10, H11, H12); 1.15 (dt, 6H, H13, H2); 0.88 (t, 3H, H1  $J_{1,3}=6.9$ );  $^{13}\text{C NMR}$  (100 MHz,  $\text{CDCl}_3$ )  $\delta$  in ppm: 168.50 (C6); 66.42 (C4); 58.52 (C7); 31.65 (C3); 29.88 (C8); 28.81 (C9); 28.38 (C10); 25.73 (C11); 22.54 (C12); 18.41 (C2); 18.23 (C1); 14.02 (C13); **FT-IR**:  $\nu$  (ATR): 2952; 2924; 2898; 2856; 2703; 2675; 2611; 2577; 2038; 1731; 1695; 1586; 1574; 1508; 1465; 1417; 1397; 1378; 1352; 1340; 1325; 1288; 1274; 1252; 1232; 1210; 1170; 1107; 1042; 996; 985; 963; 923; 904; 864; 844; 808; 760; 722; 703; 665; 536; 514; 473; 436; 411  $\text{cm}^{-1}$ ; **UV-Vis** (EtOH):  $\lambda_{\text{max}}=204.9$  nm; **Elemental analysis**: Calc. (%) for  $\text{C}_{12}\text{H}_{26}\text{NO}_2\text{Cl}$  (251.796 g/mol) C (57.24), H (10.41), N (5.63), O (12.71), Found C (57.60), H (10.38), N (5.64), O (13.29);  $[\alpha]_D^{20} = +9.933$  ( $c=0.594$  g/100  $\text{cm}^3$  EtOH).

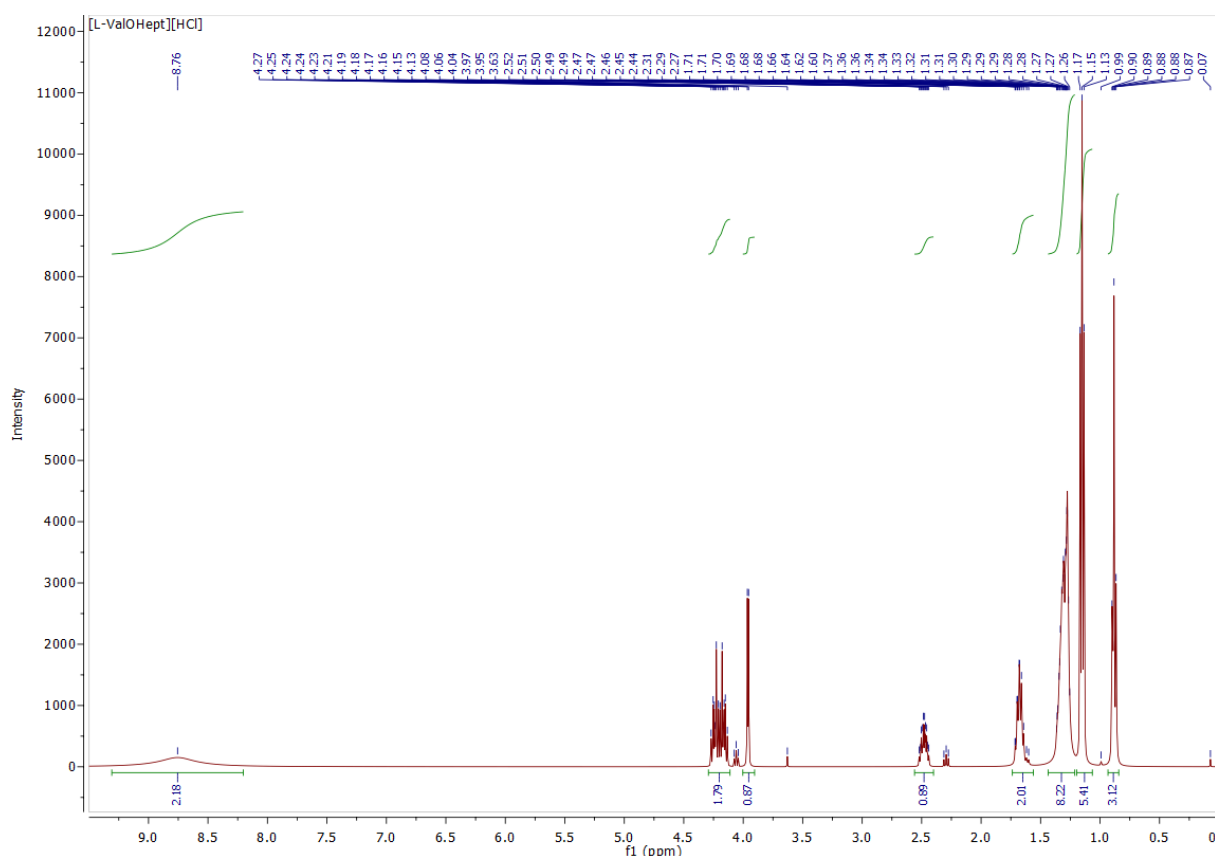

**Figure S5.**  $^1\text{H NMR}$  spectra of L-valine heptyl ester hydrochloride

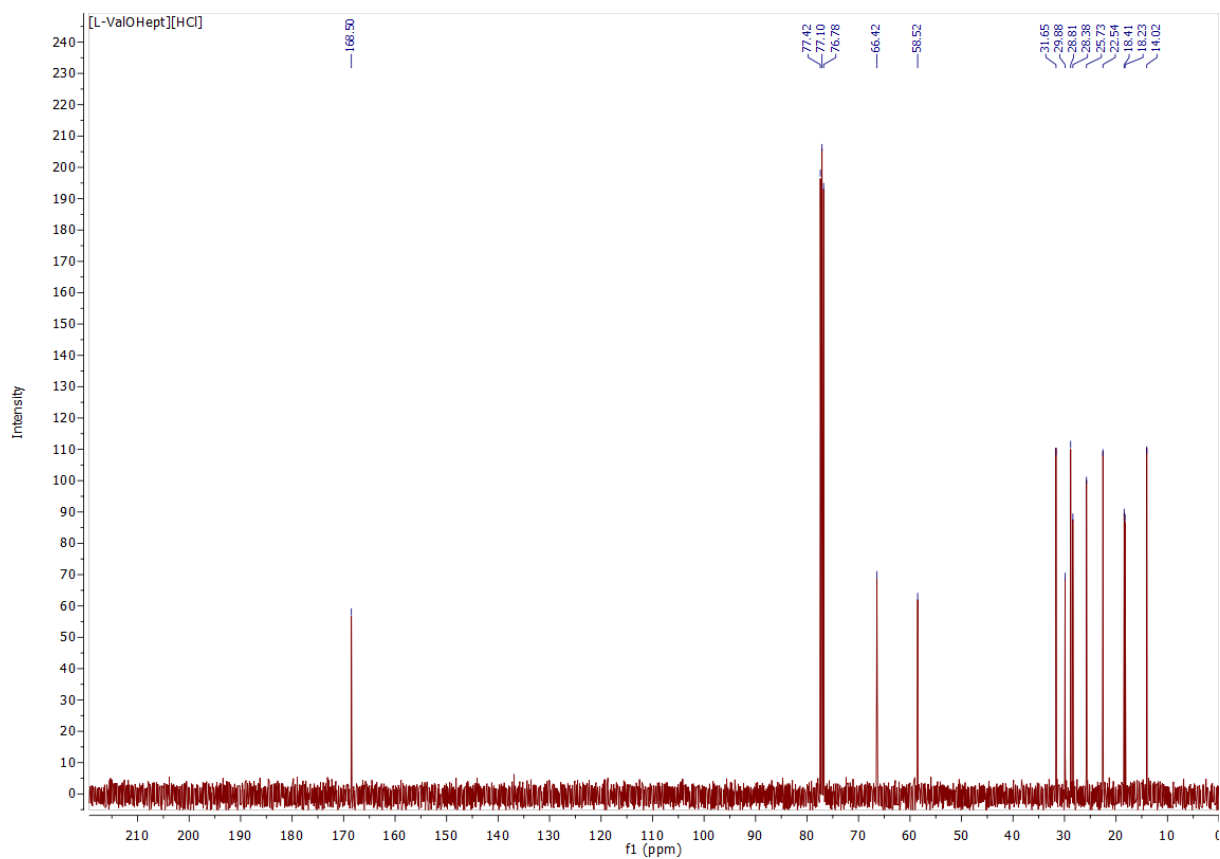

**Figure S6. <sup>13</sup>C NMR spectra of L-valine heptyl ester hydrochloride**

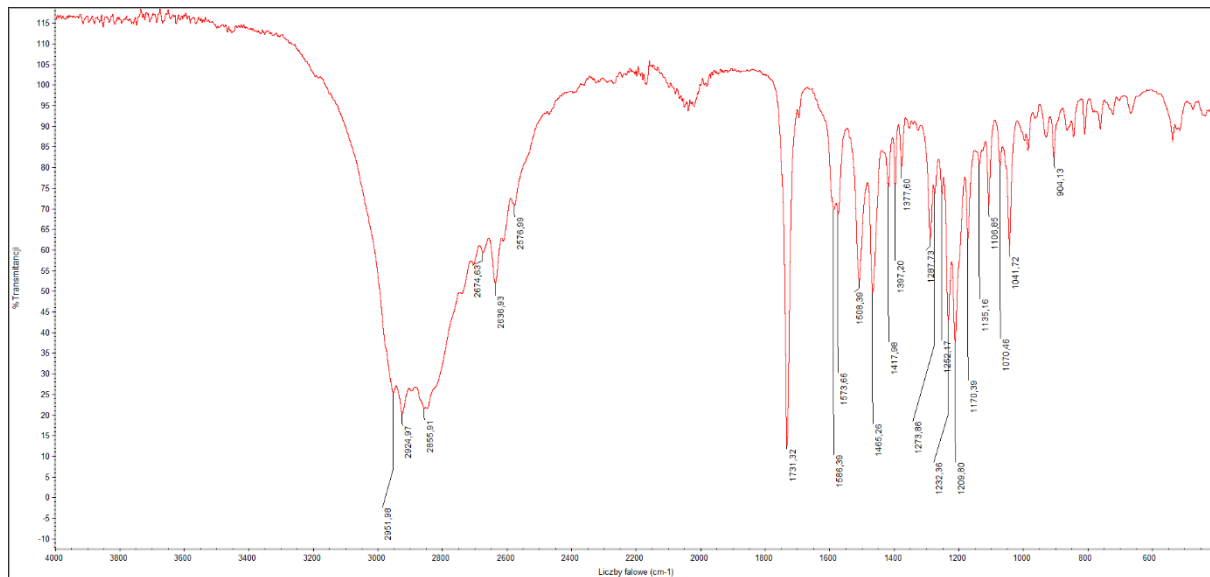

**Figure S7. FTIR spectra of L-valine heptyl ester hydrochloride**

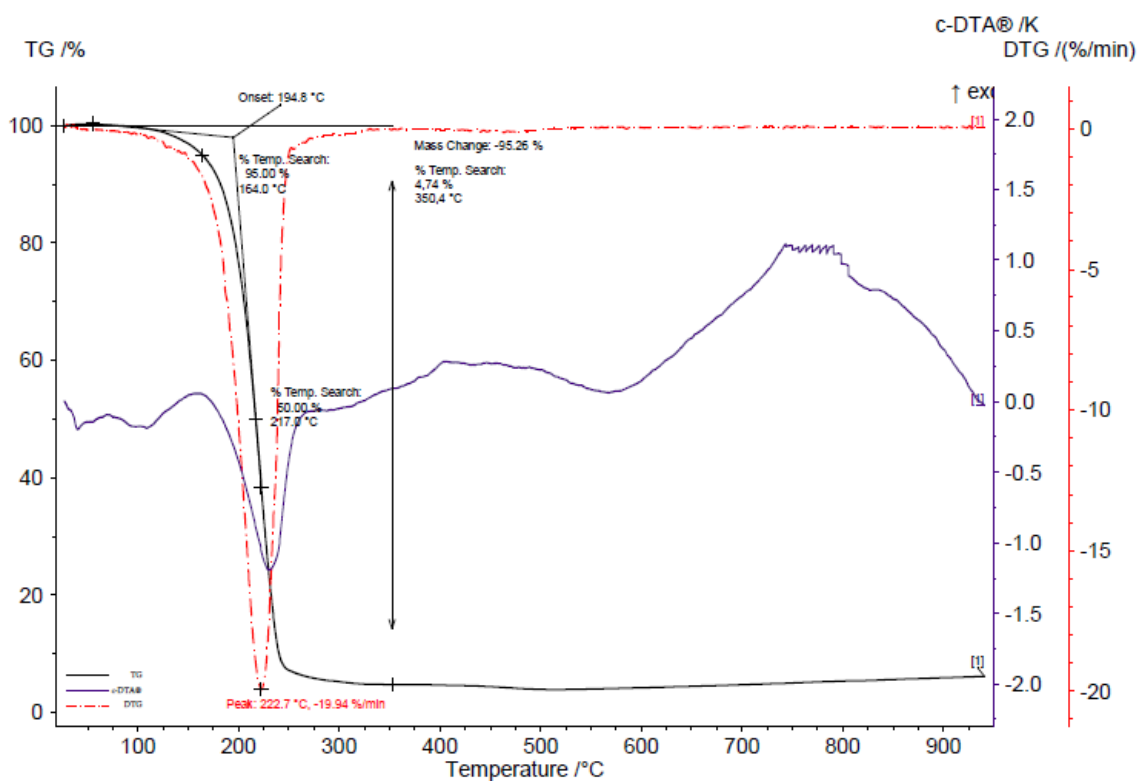

**Figure S8.** The TG, DTG and c-DTA curves of L-valine heptyl hydrochloride

## ValOOct·HCl – L-valine octyl ester hydrochloride

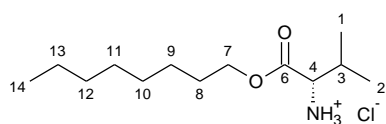

The compound was obtained according to general procedure and the reaction yielded 11.06 g of ValOOct·HCl (89.2%) as white solid.  $^1\text{H NMR}$  (400

MHz,  $\text{CDCl}_3$ )  $\delta$  in ppm: 8.42 (s, 3H, H5); 4.13-4.27 (m, 2H, H7); 3.95 (d, 1H,  $J_{4,3}=3.9$  Hz, H4); 2.46-2.52 (m, 1H, H3); 1.64-1.71 (m, 2H, H8); 1.27-1.36 (m, 10H, H9, H10, H11, H12); 1.15 (dt, 6H, H2, H13); 0.88 (t, 3H,  $J_{1,3}=6.9$  Hz, H1);  $^{13}\text{C NMR}$  (100 MHz,  $\text{CDCl}_3$ )  $\delta$  in ppm: 168.53 (C6); 66.41 (C4); 58.53 (C7); 31.74 (C3); 29.90 (C8); 29.13 (C9); 29.10 (C10); 28.38 (C11); 25.78 (C12); 22.60 (C13); 18.41 (C2); 18.25 (C1); 14.07 (C14); **FT-IR**:  $\nu$  (ATR): 2952; 2925; 2853; 2638; 2042; 1733; 1697; 1587; 1572; 1512; 1466; 1417; 1397; 1353; 1287; 1225; 1207; 1170; 1135; 1107; 1071; 1041; 990; 958; 939; 911; 878; 807; 777; 723; 666; 537; 519; 473; 443; 422; 411  $\text{cm}^{-1}$ ; **UV-Vis** (EtOH):  $\lambda_{\text{max}}=211.8$  nm; **Elemental analysis**: Calc. (%) for  $\text{C}_{13}\text{H}_{28}\text{NO}_2\text{Cl}$  (265.823 g/mol) C (58.74), H (10.62), N (5.27), O (12.04), Found C (58.79), H (10.67), N (5.60), O (12.00);  $T_m=70.9-80.4^\circ\text{C}$ ;  $[\alpha]_D^{20} = +12.035$  ( $c=0.565$  g/100  $\text{cm}^3$  EtOH).

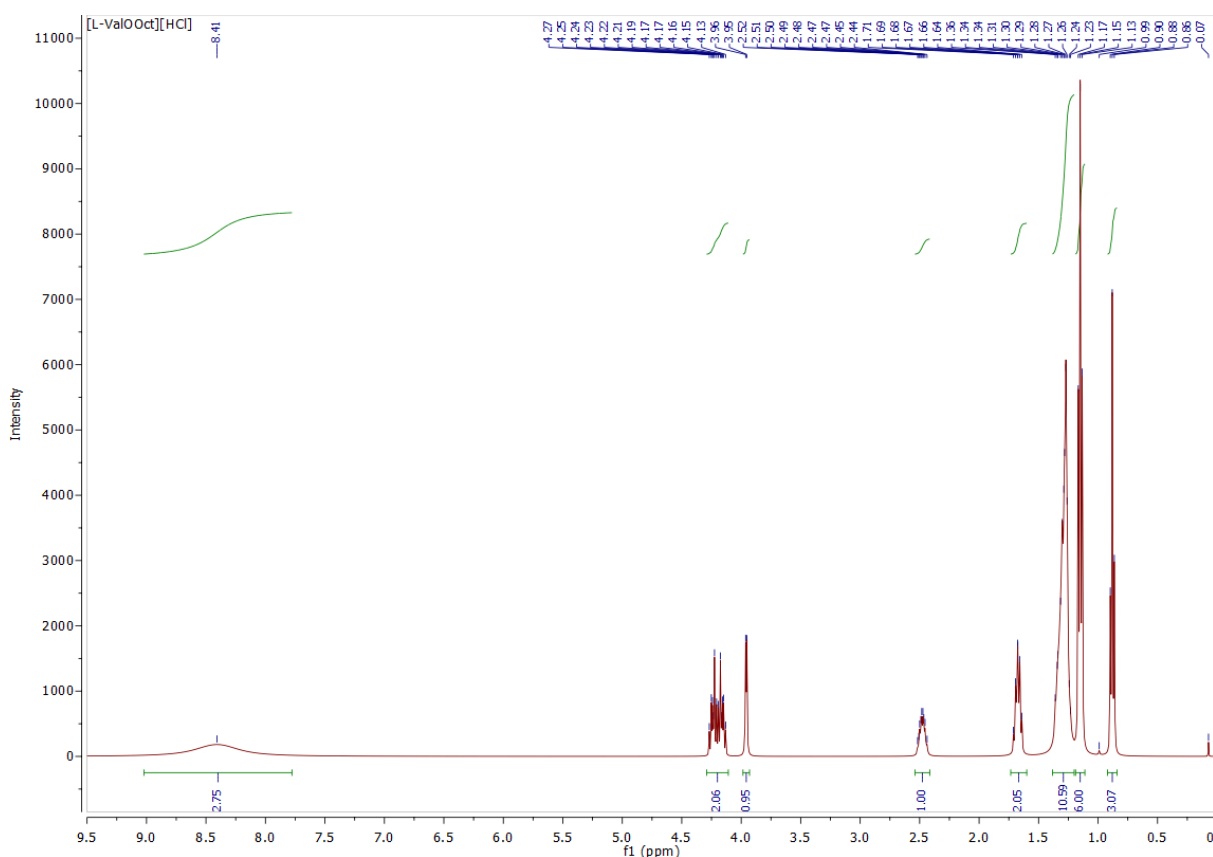

Figure S9.  $^1\text{H NMR}$  spectra of L-valine octyl ester hydrochloride



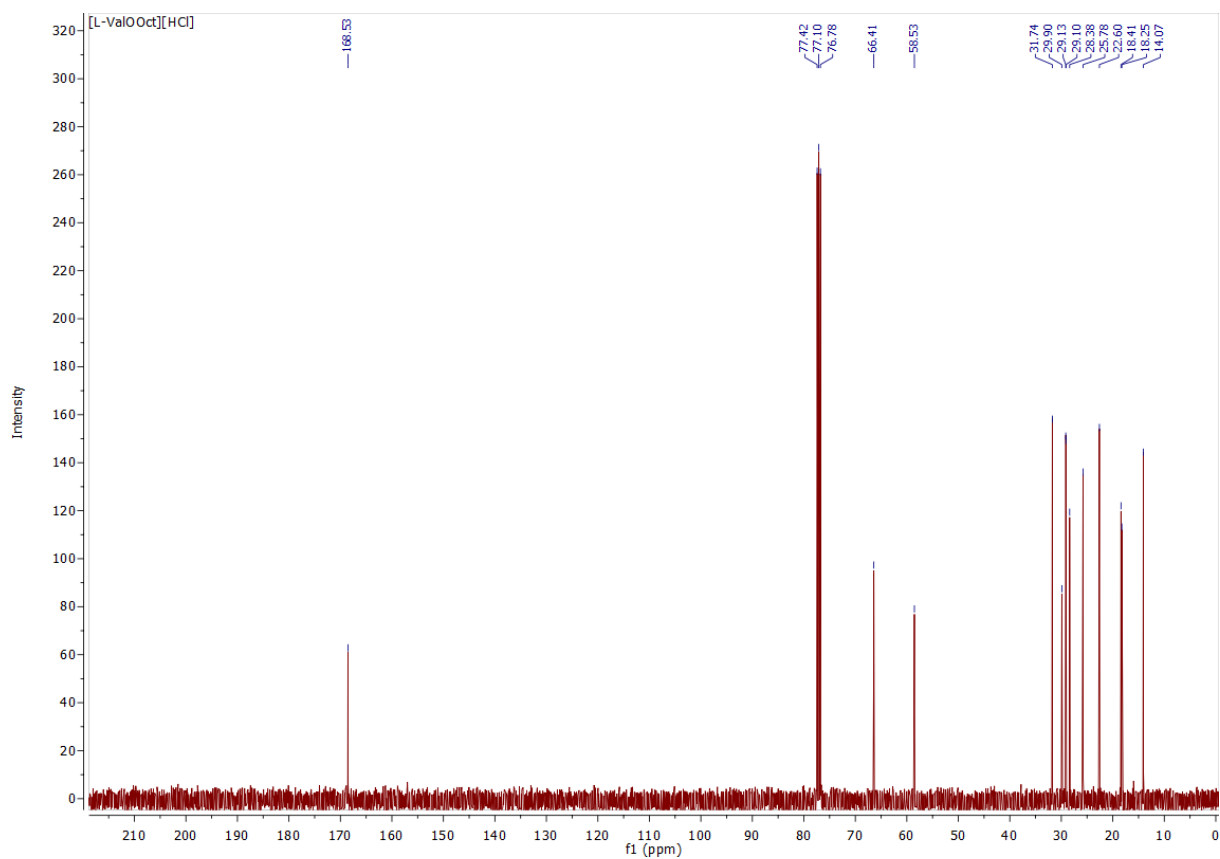

**Figure S10.**  $^{13}\text{C}$  NMR spectra of L-valine octyl ester hydrochloride

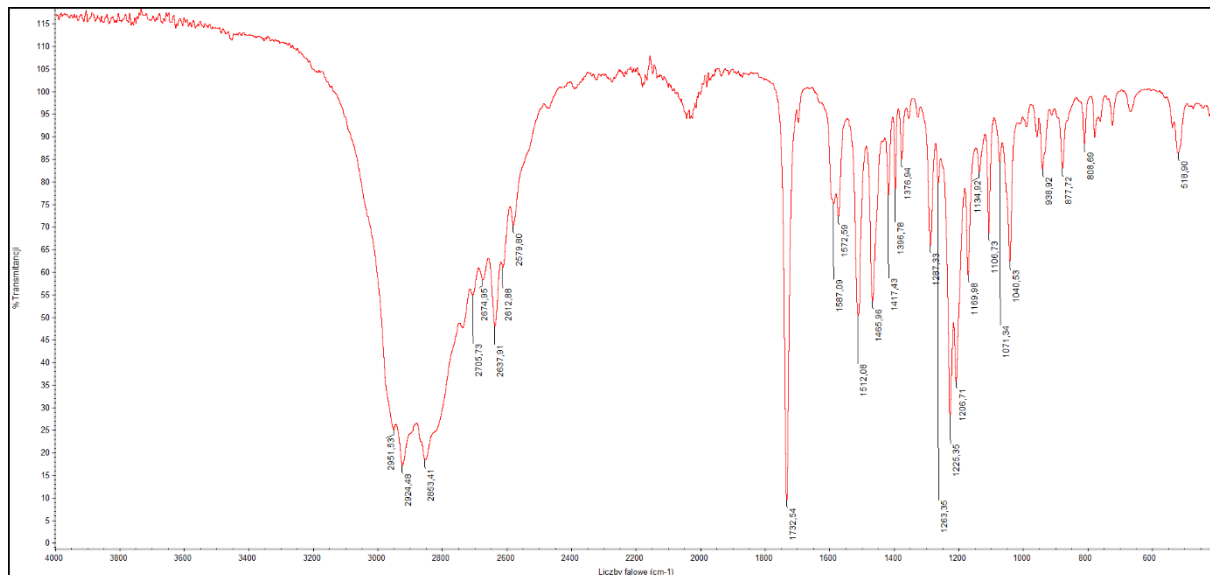

**Figure S11.** FTIR spectra of L-valine octyl ester hydrochloride

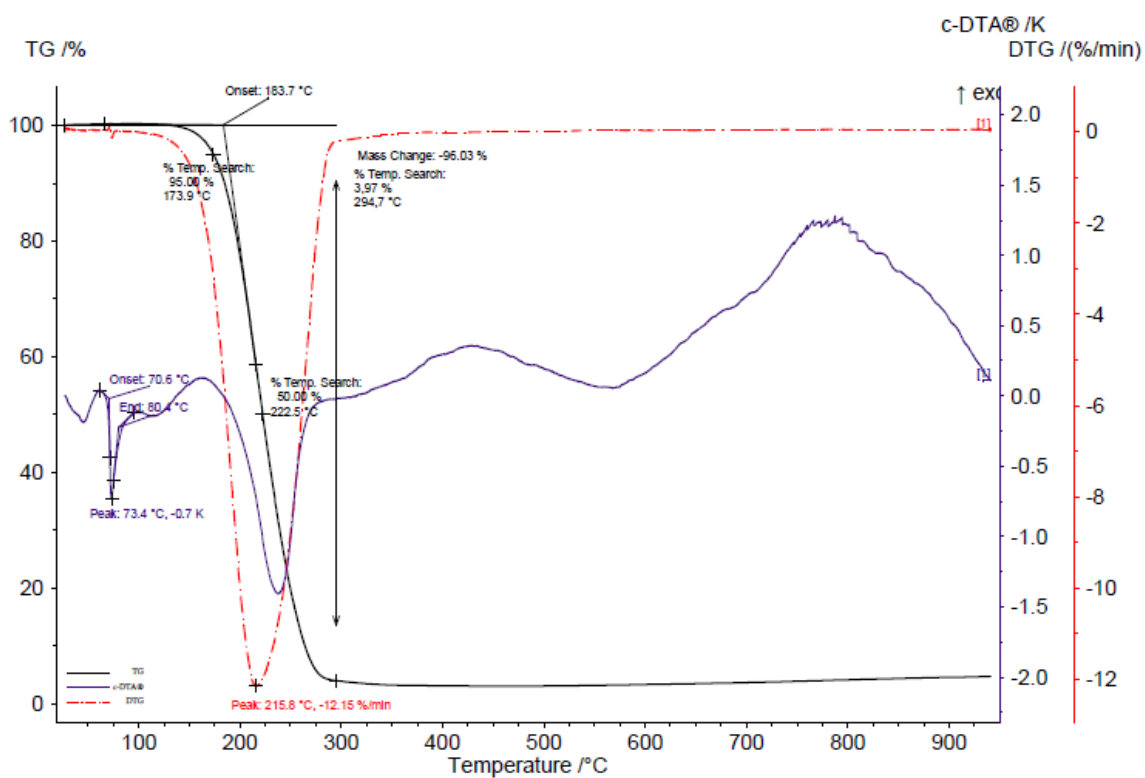

**Figure S12.** The TG, DTG and c-DTA curves of L-valine octyl hydrochloride

## L-VALINE ALKYL ESTER

**Table S2.** Amounts of substrates and yields of synthesis of L-valine alkyl esters (L-ValOR)

| No. | Compound | Substrate          |                                               | Product        |              | State         |
|-----|----------|--------------------|-----------------------------------------------|----------------|--------------|---------------|
|     |          | L-ValOR·HCl<br>[g] | 25% NH <sub>3</sub> ·H <sub>2</sub> O<br>[mL] | L-ValOR<br>[g] | Yield<br>[%] |               |
| 1   | ValOMe   | 1.17               | 3.02                                          | 0.76           | 84           | yellow liquid |
| 2   | ValOHept | 1.08               | 1.86                                          | 0.68           | 74           | yellow liquid |
| 3   | ValOOkt  | 1.27               | 1.94                                          | 0.80           | 73           | yellow liquid |

### [ValOMe]– L-valine methyl ester

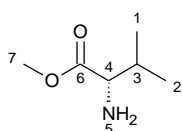

The compound was obtained according to general procedure and the reaction yielded 0.76 g of ValOMe (83.5%) as a yellow liquid. <sup>1</sup>H NMR (400 MHz,

CDCl<sub>3</sub>) δ in ppm: 3.72 (s, 3H, H7); 3.30 (d, 1H, J<sub>4,3</sub>=4.9 Hz, H4); 1.99-2.04 (m, 1H, H3); 1.52 (s, 2H, H5); 0.98 (d, 3H, J<sub>2,3</sub>=6.9 Hz, H2); 0.91 (d, 3H, J<sub>1,3</sub>=6.8 Hz, H1); <sup>13</sup>C NMR (100 MHz, CDCl<sub>3</sub>) δ in ppm: 175.89 (C6); 59.78 (C4); 51.53 (C7); 32.01 (C3); 19.12 (C2) 17.06 (C1); **FT-IR**: ν (ATR): 3439; 3429; 2960; 2934; 2874; 1731; 1604; 1466; 1436; 1388; 1369; 1339; 1280; 1225; 1194; 1170; 1083; 1050; 903; 842; 817; 765; 752; 719 cm<sup>-1</sup>; **UV-Vis** (EtOH): λ<sub>max</sub>= 203.9 nm; [α]<sub>D</sub><sup>20</sup> = +52.000 (c=0.550 g/100 cm<sup>3</sup> EtOH).

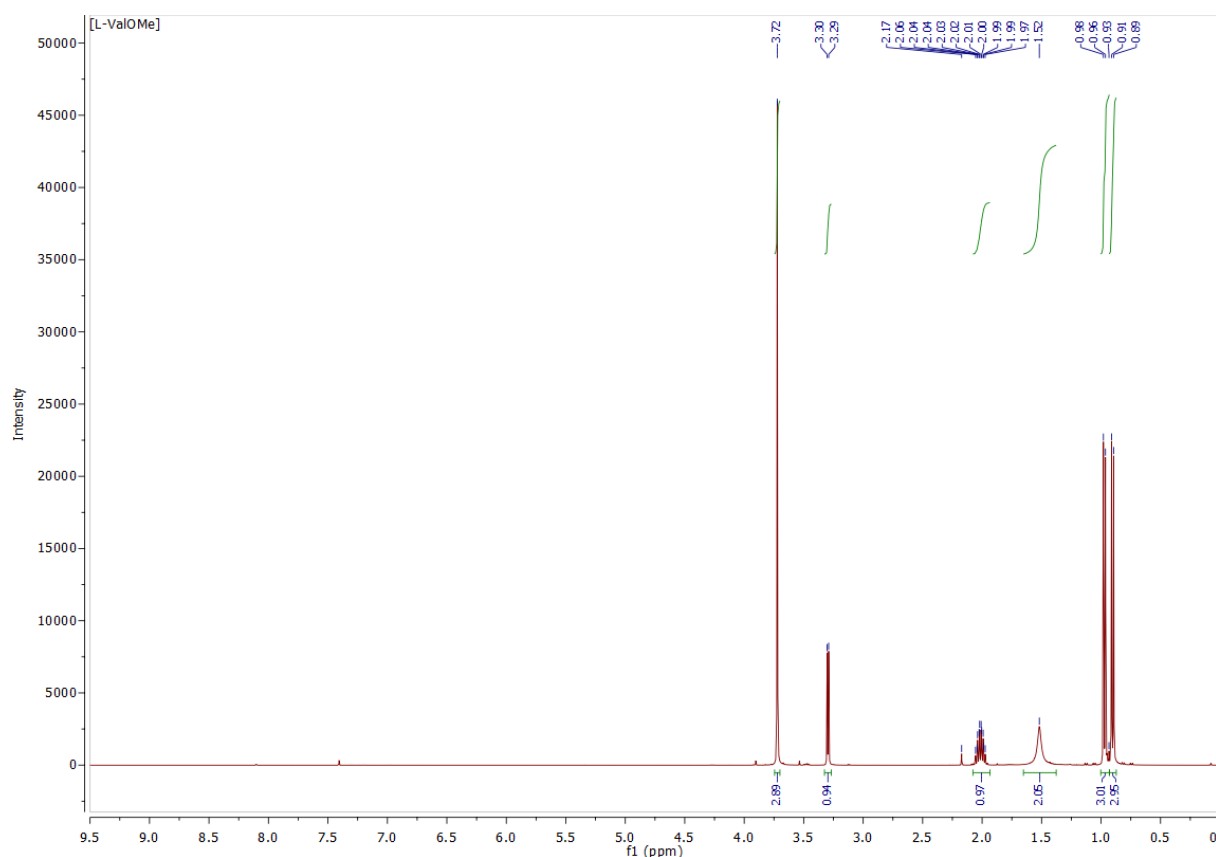

**Figure S13.** <sup>1</sup>H NMR spectra of L-valine methyl ester

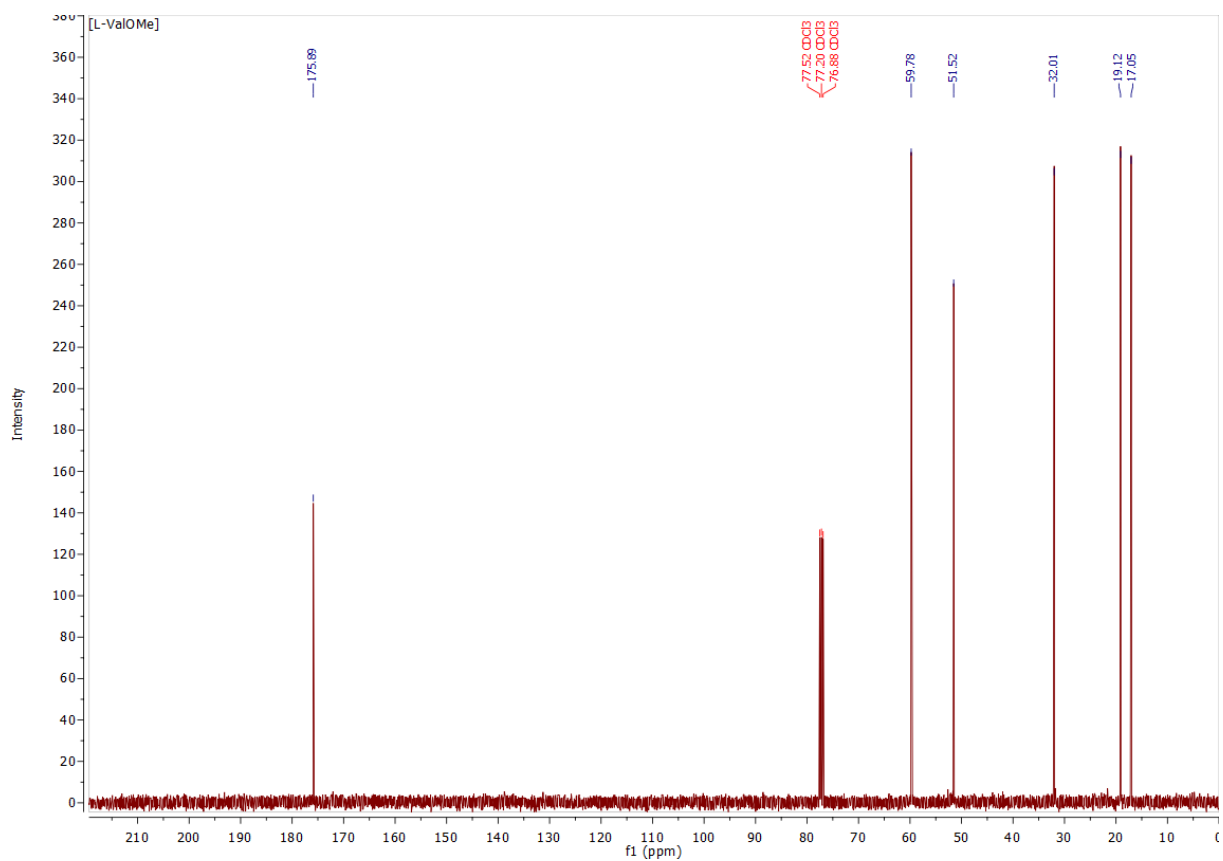

Figure S14. <sup>13</sup>C NMR spectra of L-valine methyl ester

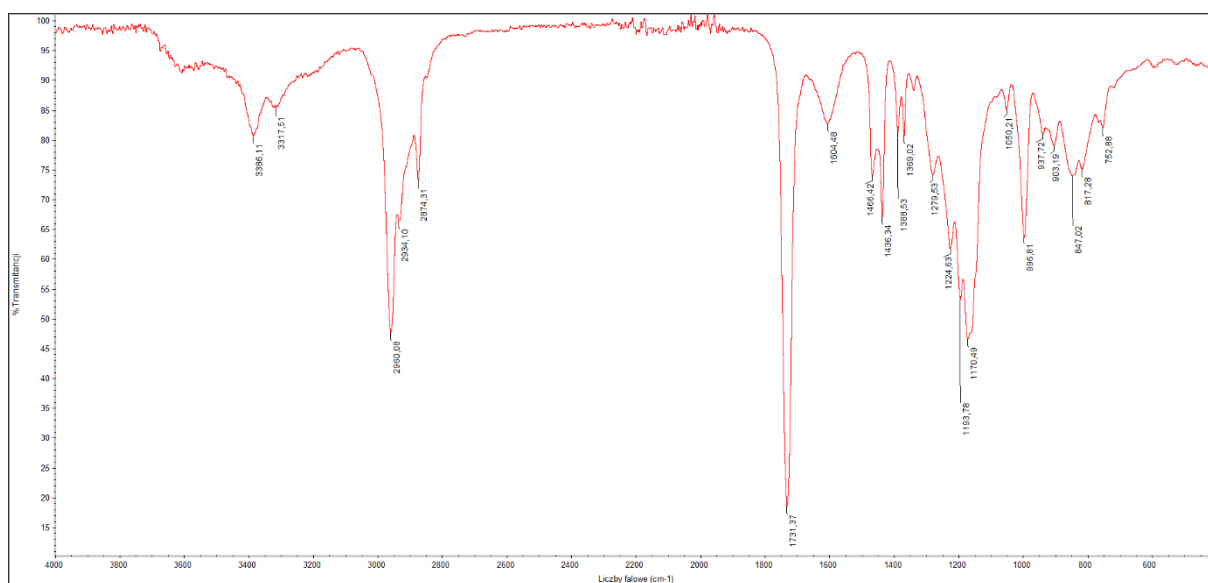

Figure S15. FTIR spectra of L-valine methyl ester

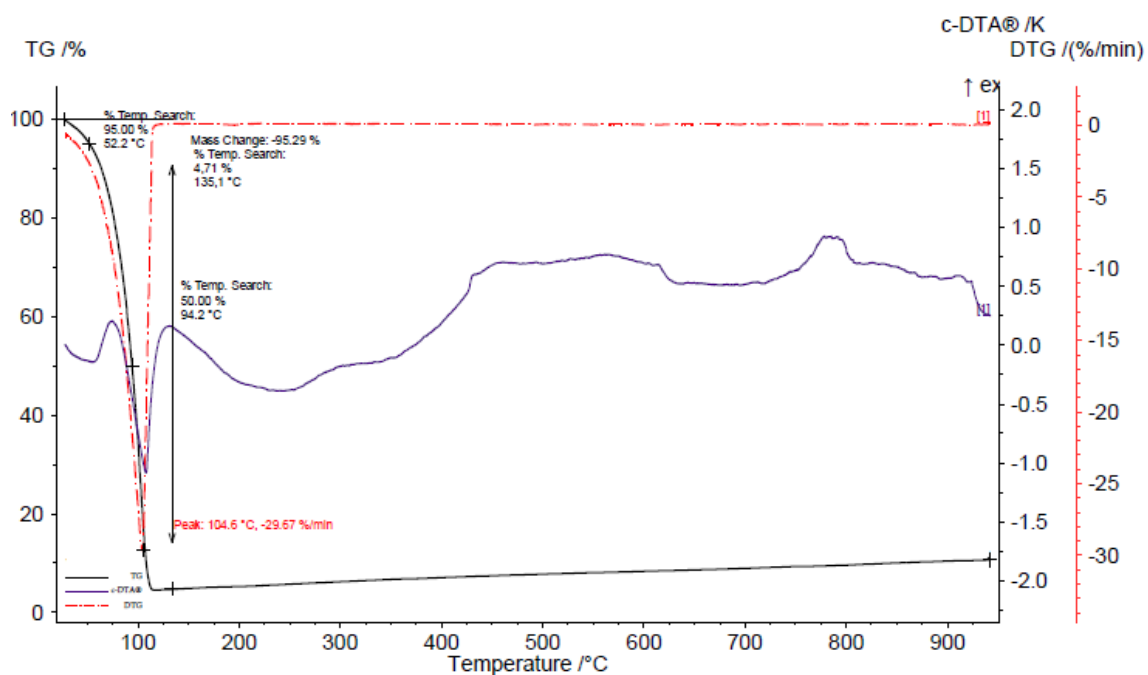

**Figure S16.** The TG, DTG and c-DTA curves of L-valine methyl ester

## [ValOHept] – L-valine heptyl ester

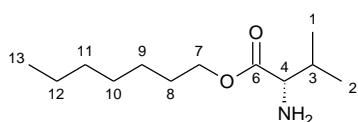

The compound was obtained according to general procedure and the reaction yielded 0.68 g of ValOHept (74.1%) as a yellow liquid.  $^1\text{H NMR}$  (400 MHz,

$\text{CDCl}_3$ )  $\delta$  in ppm: 3.98-4.09 (m, 2H, H7); 3.19 (d, 1H,  $J_{4,3}=4.0$  Hz, H4); 1.92-1.97 (m, 1H, H3); 1.55-1.60 (m, 2H, H8); 1.47 (s, 2H, H5); 1.14-1.31 (m, 8H, H9, H10, H11, H12) 0.89 (d, 3H, H2,  $J_{1,3}=6.9$ ); 0.79-0.83 (m, 6H, H14, H1);  $^{13}\text{C NMR}$  (100 MHz,  $\text{CDCl}_3$ )  $\delta$  in ppm: 175.50 (C6); 64.66 (C4); 59.78 (C7); 31.98 (C3); 31.56 (C8); 28.73 (C9); 28.49 (C10); 25.74 (C11); 22.42 (C12); 19.15 (C2); 16.99 (C1); 13.89 (C13); **FT-IR**:  $\nu$  (ATR): 3392; 3328; 2957; 2927; 2871; 2858; 1731; 1608; 1467; 1388; 1379; 1368; 1338; 1277; 1225; 1172; 1049; 990; 954; 928; 906; 848; 725;  $\text{cm}^{-1}$ ; **UV-Vis** (EtOH):  $\lambda_{\text{max}}=205.7$  nm;  $[\alpha]_{\text{D}}^{20} = +15.750$  (c=0.800 g/100  $\text{cm}^3$  EtOH).

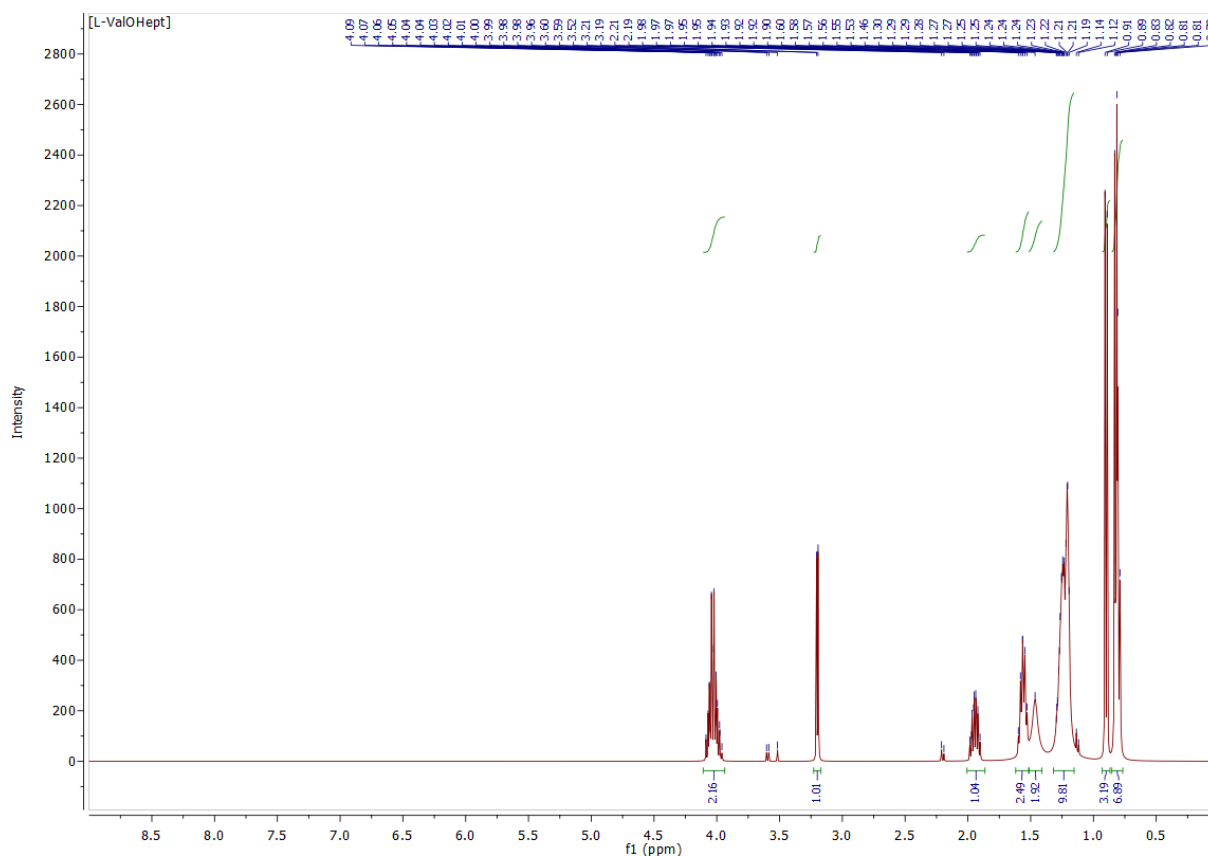

Figure S17.  $^1\text{H NMR}$  spectra of L-valine heptyl ester

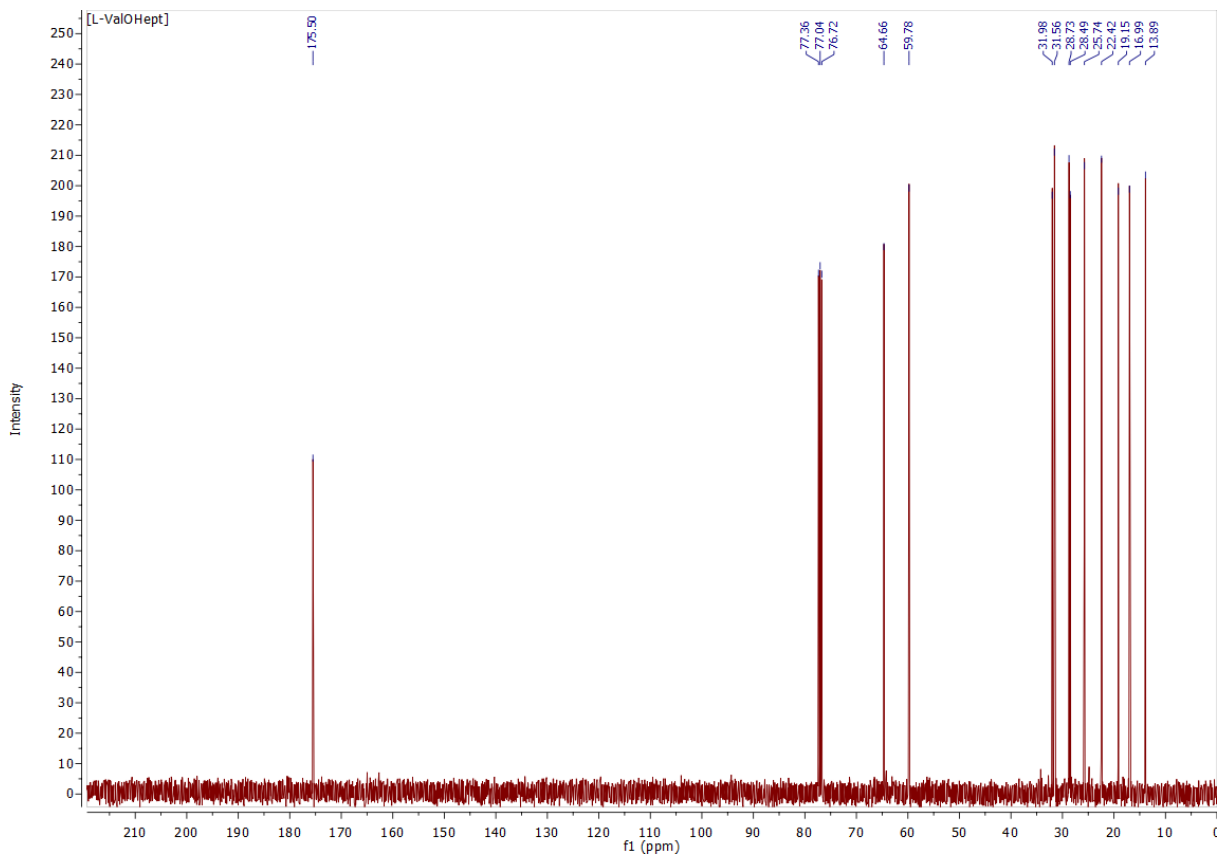

Figure S18.  $^{13}\text{C}$  NMR spectra of L-valine heptyl ester

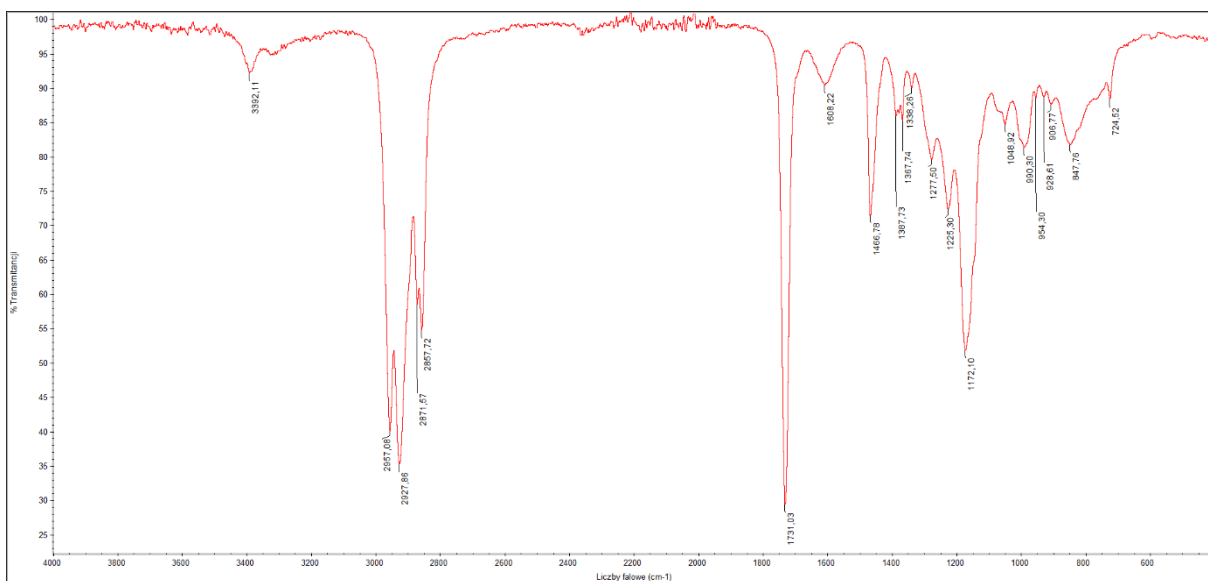

Figure S19. FTIR spectra of L-valine heptyl ester

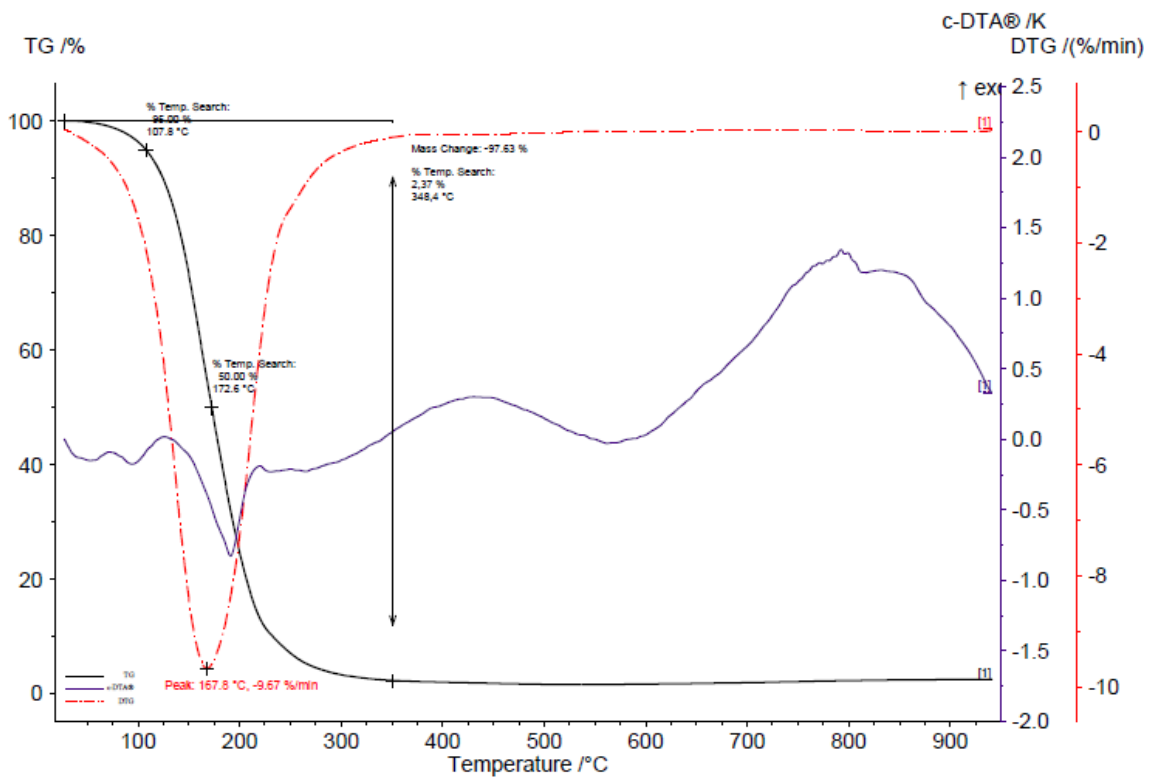

**Figure S20.** The TG, DTG and c-DTA curves of L-valine heptyl ester



## [ValOOct] – L-valine octyl ester

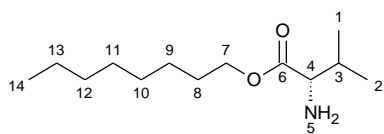

The compound was obtained according to general procedure and the reaction yielded 0.80 g of ValOOct (73.0%) as a yellow liquid.  $^1\text{H NMR}$  (400 MHz,  $\text{CDCl}_3$ )  $\delta$  in ppm: 3.90-4.01 (m, 2H, H7); 3.12 (d, 1H,

$J_{4,3}=5.0$  Hz, H4); 1.83-1.91 (m, 1H, H3); 1.45-1.52 (m, 4H, H8, H5); 1.03-1.22 (m, 10H, H9, H10, H11, H12, H13) 0.82 (d, 3H, H2,  $J_{1,3}=6.9$ ); 0.71-0.76 (m, 6H, H14, H1);  $^{13}\text{C NMR}$  (100 MHz,  $\text{CDCl}_3$ )  $\delta$  in ppm: 175.38 (C6); 64.53 (C4); 59.68 (C7); 31.90 (C3); 31.55 (C8); 28.95 (C9); 28.42 (C10); 22.40 (C11); 19.03 (C2); 16.90 (C1); 13.82 (C14); **FT-IR**:  $\nu$  (ATR): 3389; 3327; 2957; 927; 2856; 2856; 1731; 1607; 1467; 1388; 1379; 1368; 1338; 1280; 1223; 1172; 1074; 1048; 982; 955; 982; 955; 908; 844; 770; 725;  $\text{cm}^{-1}$ ; **UV-Vis** (EtOH):  $\lambda_{\text{max}}= 204.4$  nm;  $[\alpha]_D^{20} = +18.127$  ( $c=1.164$  g/100  $\text{cm}^3$  EtOH).

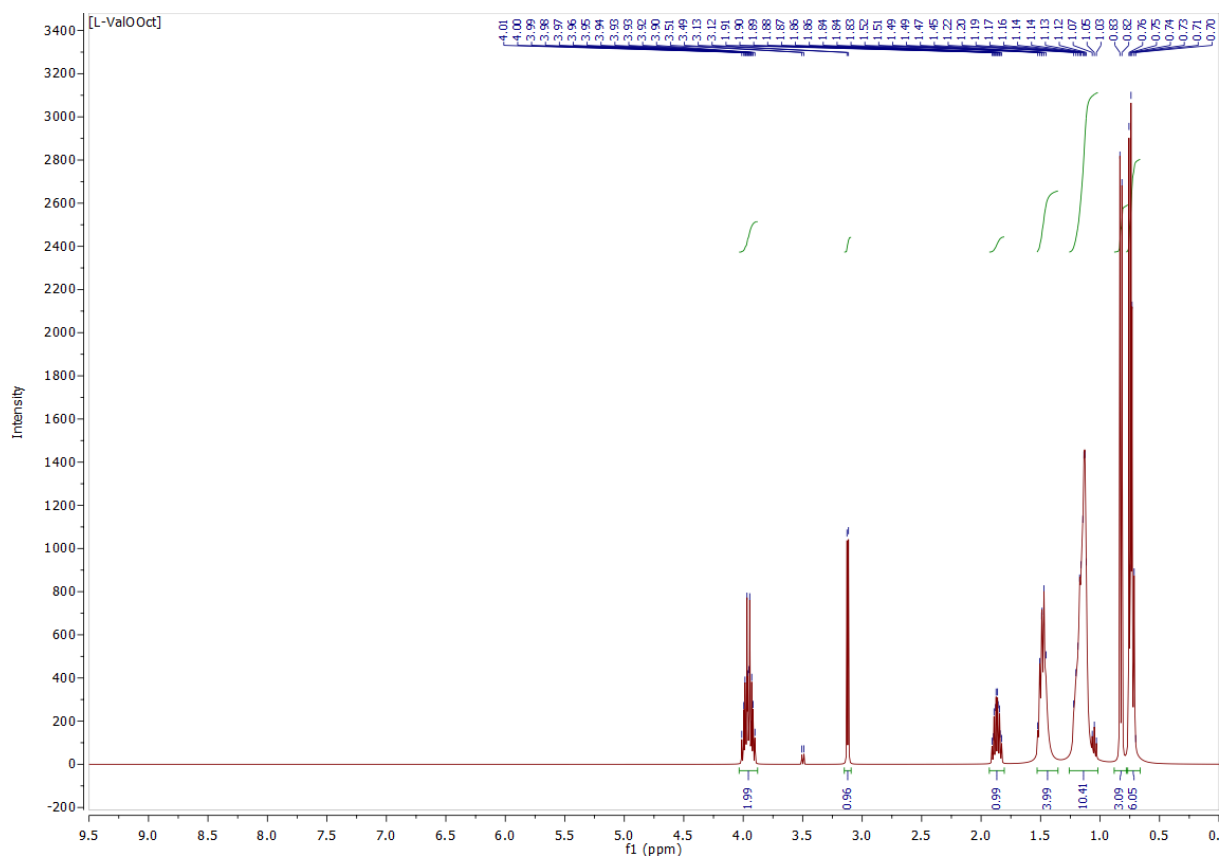

Figure S21.  $^1\text{H NMR}$  spectra of L-valine octyl ester

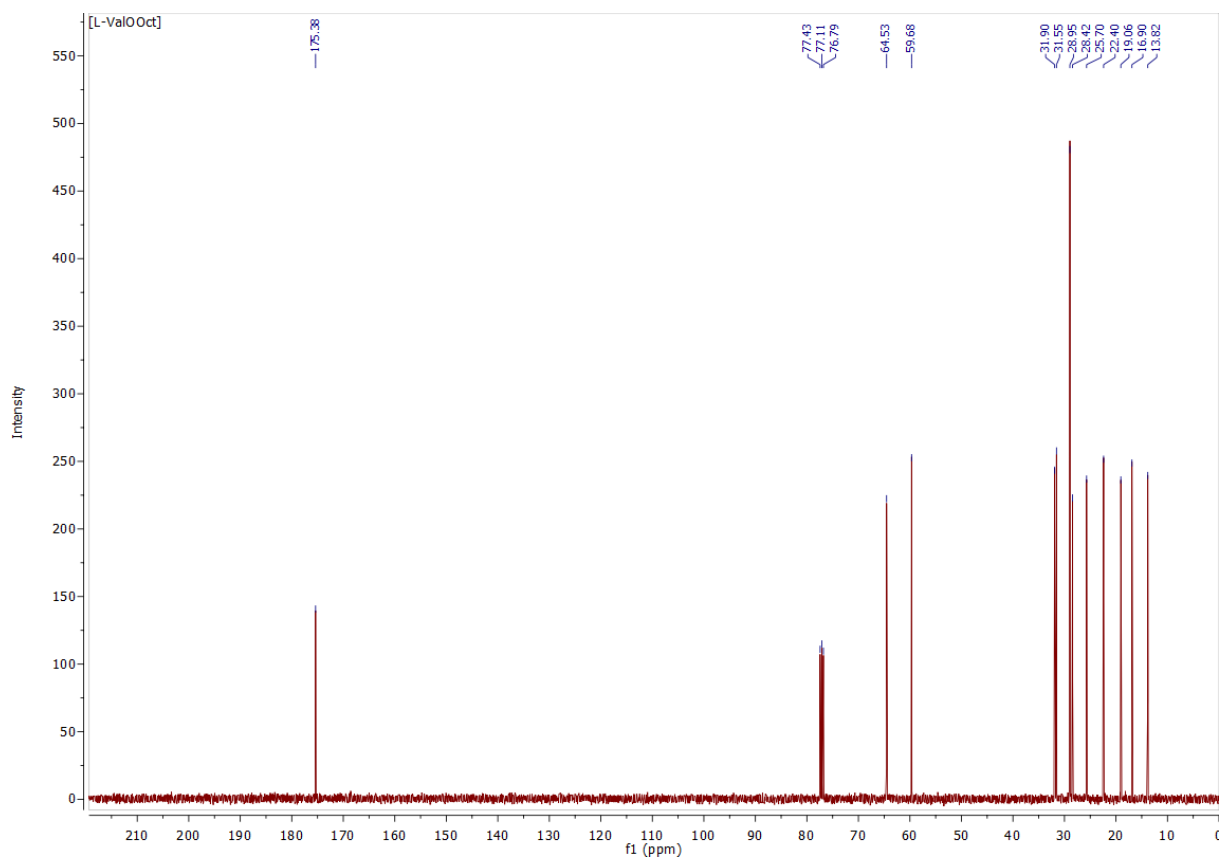

**Figure S22.**  $^{13}\text{C}$  NMR spectra of L-valine octyl ester

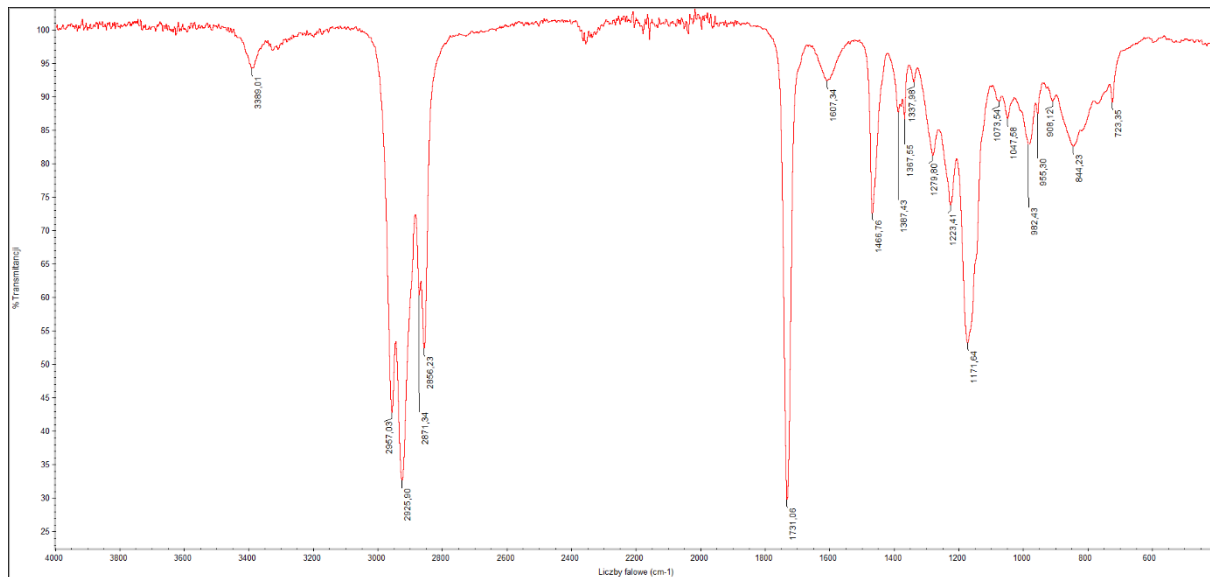

**Figure S23.** FTIR spectra of L-valine octyl ester

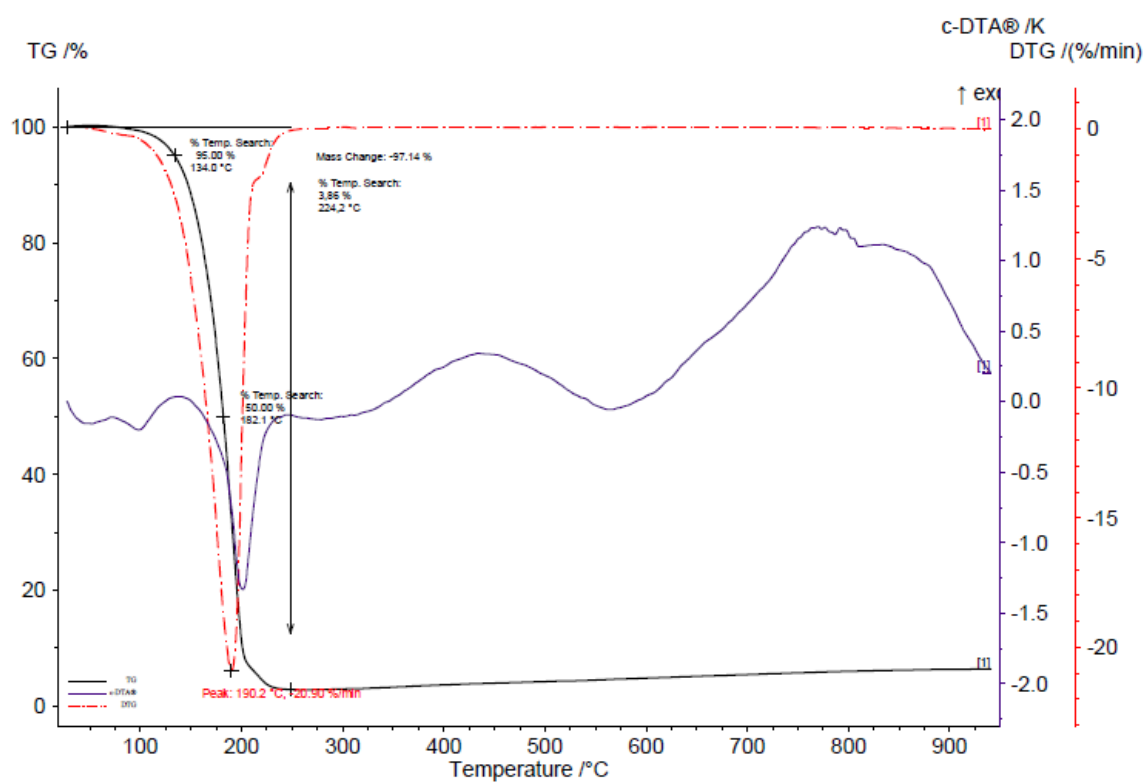

**Figure S24.** The TG, DTG and c-DTA curves of L-valine octyl ester

## L-VALINE ALKYL ESTER IBUPROFENATE

**Table S3.** Yields of synthesis of L-valine alkyl esters ibuprofenate ([L-ValOR][IBU])

| No. | Compound          | Substrate   |               | Product            | Yield [%] | State       |
|-----|-------------------|-------------|---------------|--------------------|-----------|-------------|
|     |                   | L-ValOR [g] | Ibuprofen [g] | [L-ValOR][IBU] [g] |           |             |
| 1   | [L-ValOMe][IBU]   | 0.60        | 0.94          | 1.51               | 97.6      | white solid |
| 2   | [L-ValOHept][IBU] | 0.65        | 0.62          | 1.17               | 92.0      | white solid |
| 3   | [L-ValOOct][IBU]  | 0.57        | 0.51          | 1.06               | 98.0      | white solid |

### [ValOMe][IBU] – L-valine methyl ester ibuprofenate

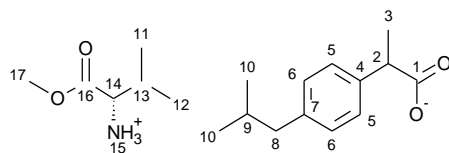

The compound was obtained according to general procedure and the reaction yielded 1.46 g of [ValOMe][IBU](97.6%) as white solid. **<sup>1</sup>H NMR** (400 MHz, CDCl<sub>3</sub>) δ in ppm: 7.18 (d, 2H, J<sub>5,6</sub>=8.1 Hz, H5); 7.05 (d, 2H, J<sub>6,5</sub>=8.1 Hz, H6); 5.08 (s, 3H, H15); 3.71 (s, 3H, H17); 3.63-3.69 (q, 1H, H2); 3.38 (d, 1H, J<sub>14,13</sub>=4.6 Hz, H14); 2.43 (d, 2H, J<sub>8,9</sub>=7.1 Hz, H8); 2.01-2.09 (m, 1H, H13); 1.79-1.87 (m, 1H, H9); 1.46 (d, 3H, J<sub>3,2</sub>=7.1 Hz, H3); 0.94 (d, 3H, H11); 0.83-0.94 (m, 12H, H10, H11, H12); **<sup>13</sup>C NMR** (100 MHz, CDCl<sub>3</sub>) δ in ppm: 179.31 (C1); 175.01 (C16); 140.50 (C7); 137.89 (C4); 129.30 (C5); 127.26 (C6); 59.26 (C14); 51.95 (C14); 45.30 (C8); 45.06 (C2); 31.76 (C13); 30.20 (C9); 22.41 (C10); 18.96 (C12); 18.37 (C3); 17.27 (C11); **FT-IR:** ν (ATR): 2964; 2929; 2867; 1740; 1599; 1548; 1511; 1464; 1452; 1384; 1357; 1331; 1286; 1262; 1226; 1203; 1173; 1111; 1075; 1057; 986; 978; 882; 770; 727; 693; 528 cm<sup>-1</sup>; **UV-Vis** (EtOH): λ<sub>max</sub>=228.7 nm; **Elemental analysis:** Calc. (%) for C<sub>20</sub>H<sub>33</sub>NO<sub>4</sub> (337.458 g/mol) C (67.63), H (9.26), N (4.15), O (18.96), Found C (67.63), H (9.26), N (4.11), O (18.18); **T<sub>m</sub>**=81.5-96.2°C; [ $\alpha$ ]<sub>D</sub><sup>20</sup> = +14.933 (c=0.529 g/100 cm<sup>3</sup> EtOH).

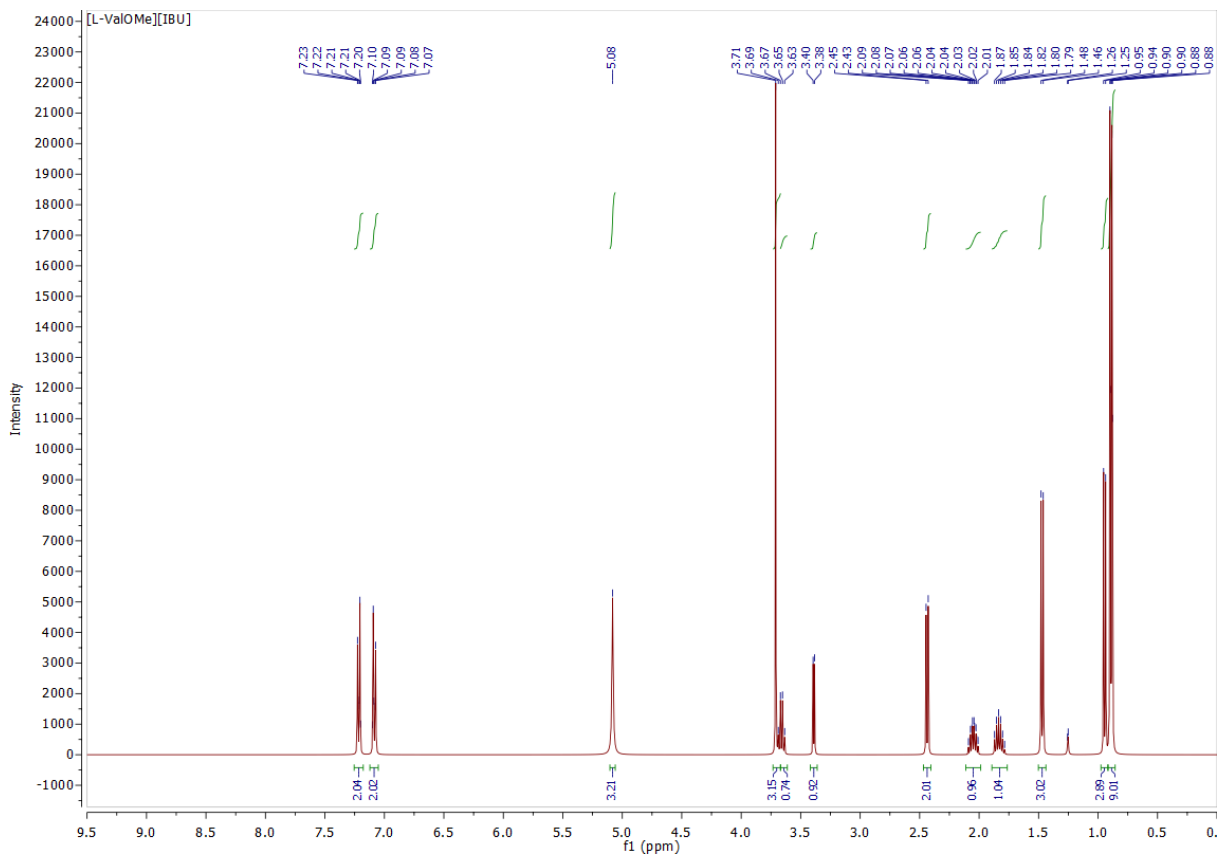

Figure S25.  $^1\text{H}$  NMR spectra of L-valine methyl ester ibuprofenate

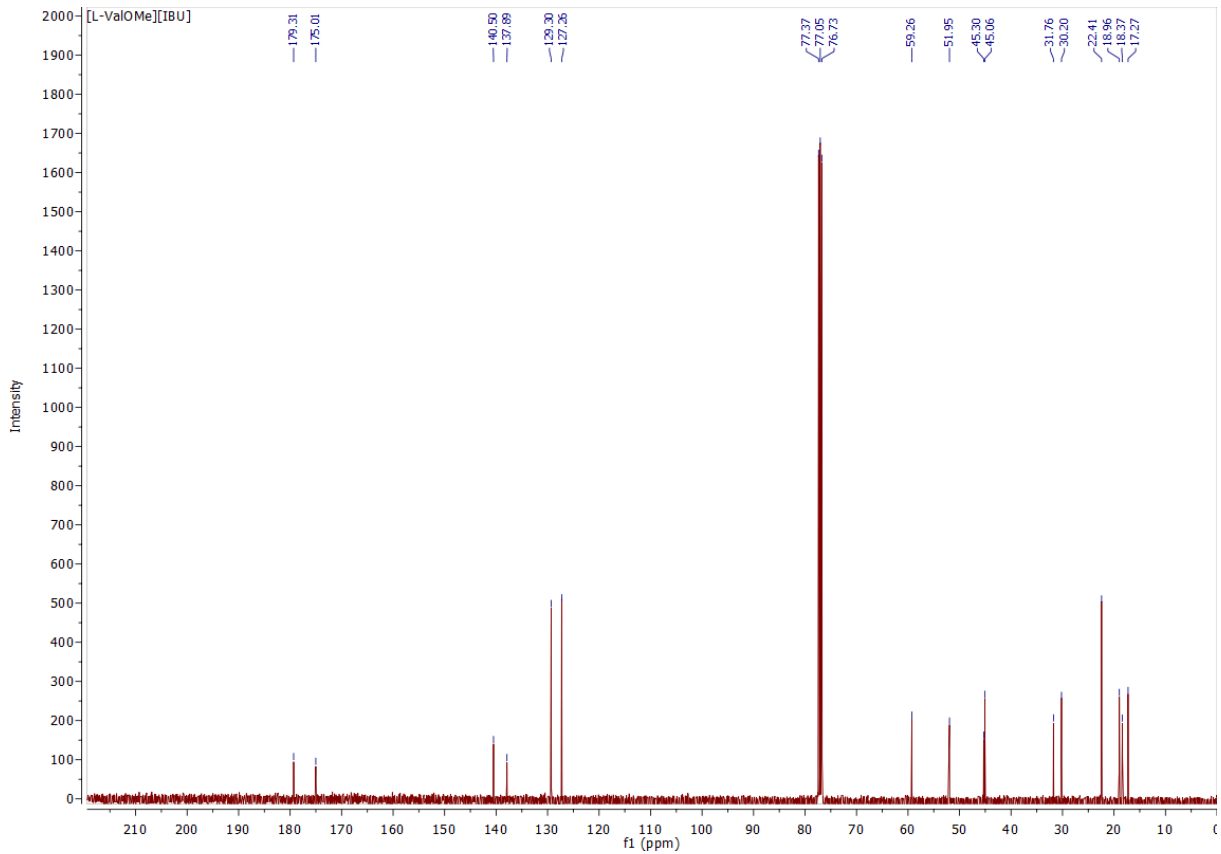

Figure S26.  $^{13}\text{C}$  NMR spectra of L-valine methyl ester ibuprofenate

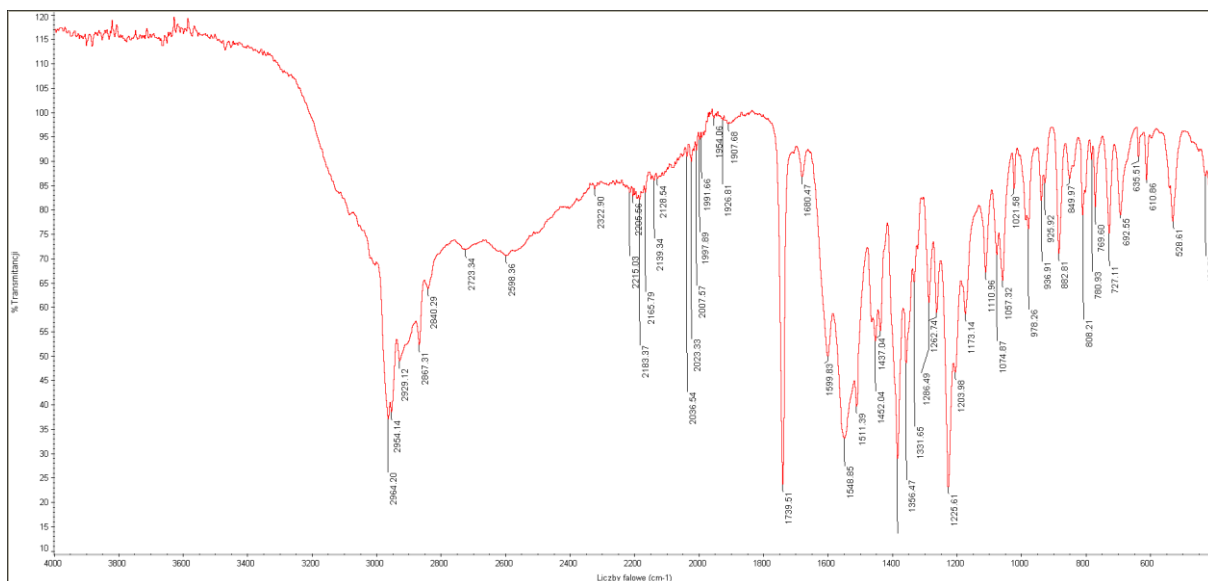

**Figure S27.** FT-IR spectra of L-valine methyl ester ibuprofenate

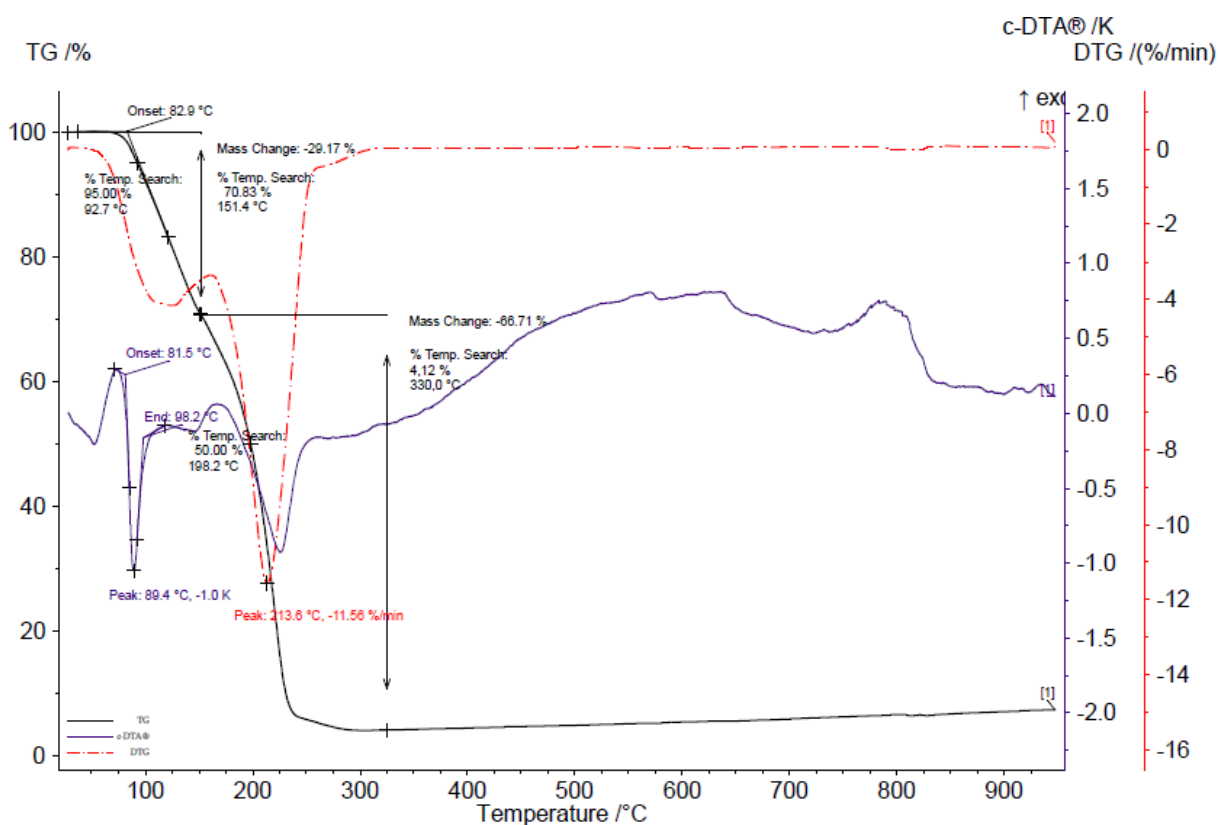

**Figure S28.** The TG, DTG and c-DTA curves of L-valine methyl ester ibuprofenate

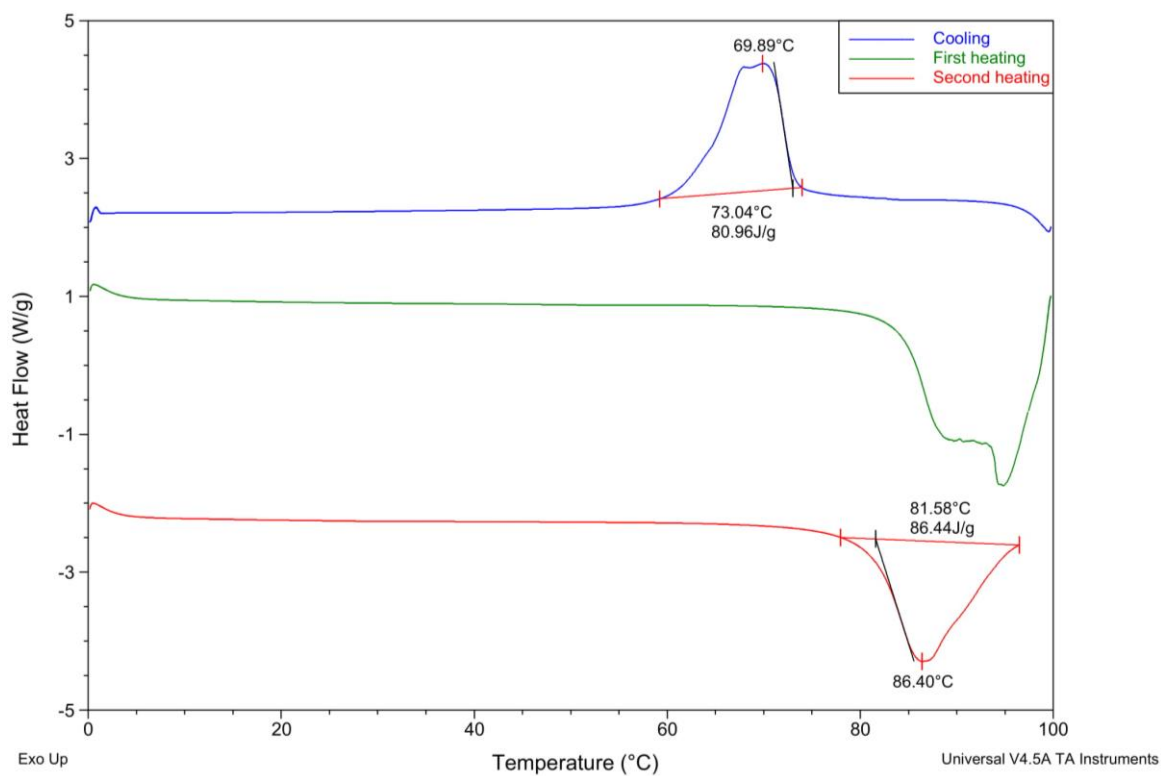

**Figure S29.** The DSC curves of L-valine methyl ester ibuprofenate

## [ValOHept][IBU] – L-valine heptyl ester ibuprofenate

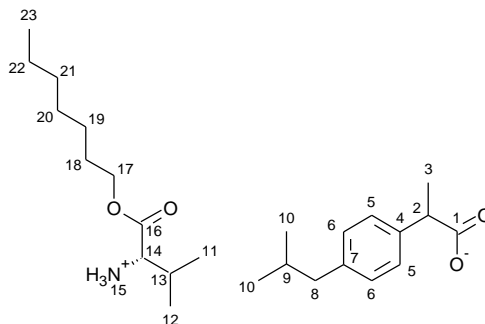

The compound was obtained according to general procedure and the reaction yielded 1.4 g of [L-ValOHept][IBU] (92.0%) as white solid. **<sup>1</sup>H NMR** (400 MHz, CDCl<sub>3</sub>) δ in ppm: 7.20 (d, 2H, J<sub>5,6</sub>=8.1 Hz, H5); 7.06 (d, 2H, J<sub>6,5</sub>=8.0 Hz, H6); 5.82 (s, 3H, H15); 4.06-4.14 (m, 2H, H17); 3.61-3.66 (m, 1H, H2); 3.39 (d, 1H, J<sub>14,13</sub>=4.5 Hz, H14); 2.42 (d, 2H, J<sub>8,9</sub>=7.1 Hz, H8); 2.03-2.08 (m, 1H, H13); 1.80-1.85 (m, 1H, H9); 1.59-1.64 (m, 2H, H18); 1.44 (d, 3H, J<sub>3,2</sub>=7.1 Hz, H3); 1.26-1.33 (m, 9H, H19, H20, H21, H22); 0.87-0.94(m, 15H, H10, H11, H12, H23); **<sup>13</sup>C NMR** (100 MHz, CDCl<sub>3</sub>) δ in ppm: 179.22 (C1); 174.20 (C16); 140.28 (C7); 138.32 (C4); 129.23 (C5); 127.26 (C6); 65.24 (C17); 59.07 (C14); 45.57 (C8); 45.07 (C2); 31.71(C13); 31.56 (C18); 30.20 (C9); 28.87 (C19); 28.58 (C20); 25.86 (C21); 22.59 (C22); 22.42 (C10); 18.84 (C12); 18.49 (C3); 17.27 (C11); 14.07 (C23); **FT-IR**: ν (ATR): 2959; 2927; 2863; 2727; 2160; 1737; 1677; 1600; 1583; 1545; 1510; 1465; 1416; 1388; 1358; 1320; 1288; 1255; 1224; 1212; 1175; 1116; 1060; 1022; 1003; 936; 882; 848; 810; 786; 725; 694; 636 cm<sup>-1</sup>; **UV-Vis** (EtOH): λ<sub>max</sub>=219.5 nm; **Elemental analysis**: Calc. (%) for C<sub>25</sub>H<sub>43</sub>NO<sub>4</sub> (421.619 g/mol) C (71.72), H (10.23), N (3.32), O (15.18), Found C (71.22), H (10.30), N (3.04), O (15.14); **T<sub>m</sub>**=57.5-72.2°C; [α]<sub>D</sub><sup>20</sup> = +7.678 (c=0.533 g/100 cm<sup>3</sup> EtOH).



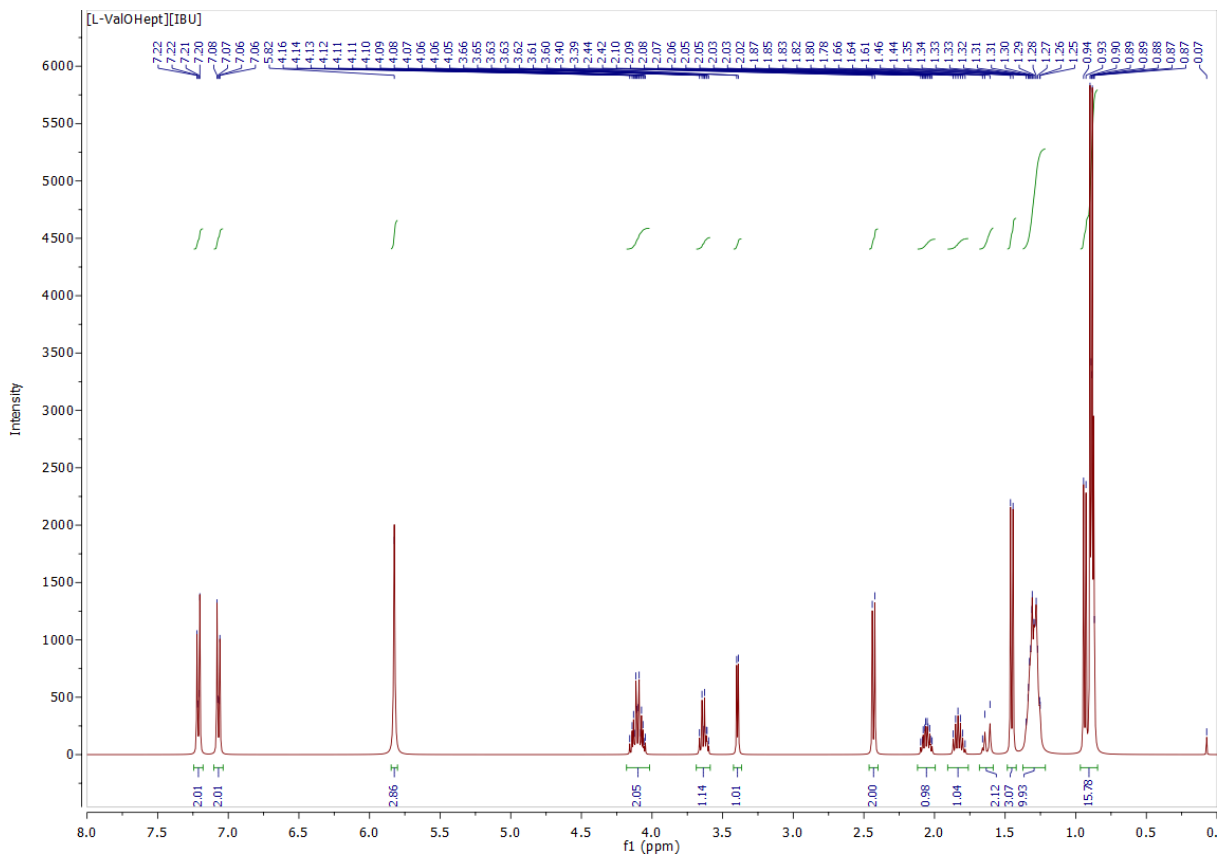

**Figure S30. <sup>1</sup>H NMR spectra of L-valine heptyl ester ibuprofenate**

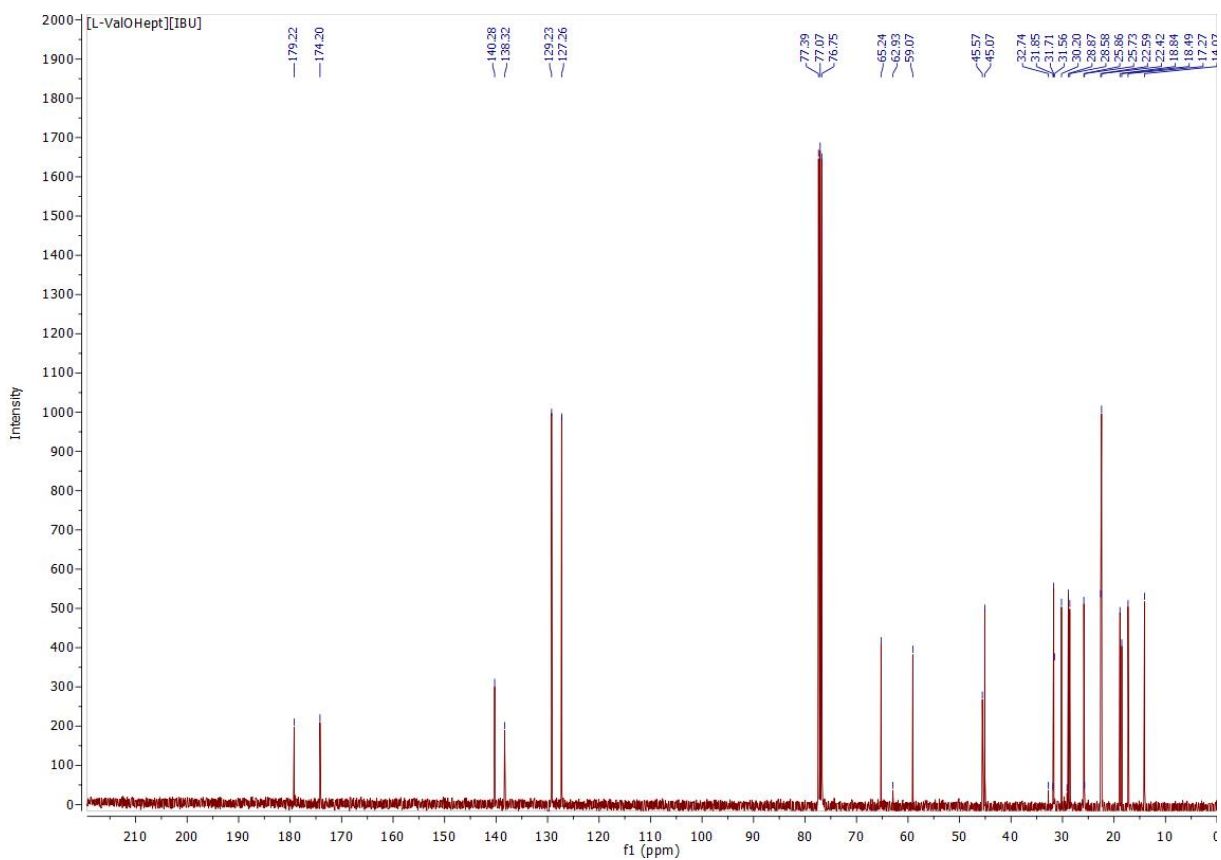

**Figure S31. <sup>13</sup>C NMR spectra of L-valine heptyl ester ibuprofenate**

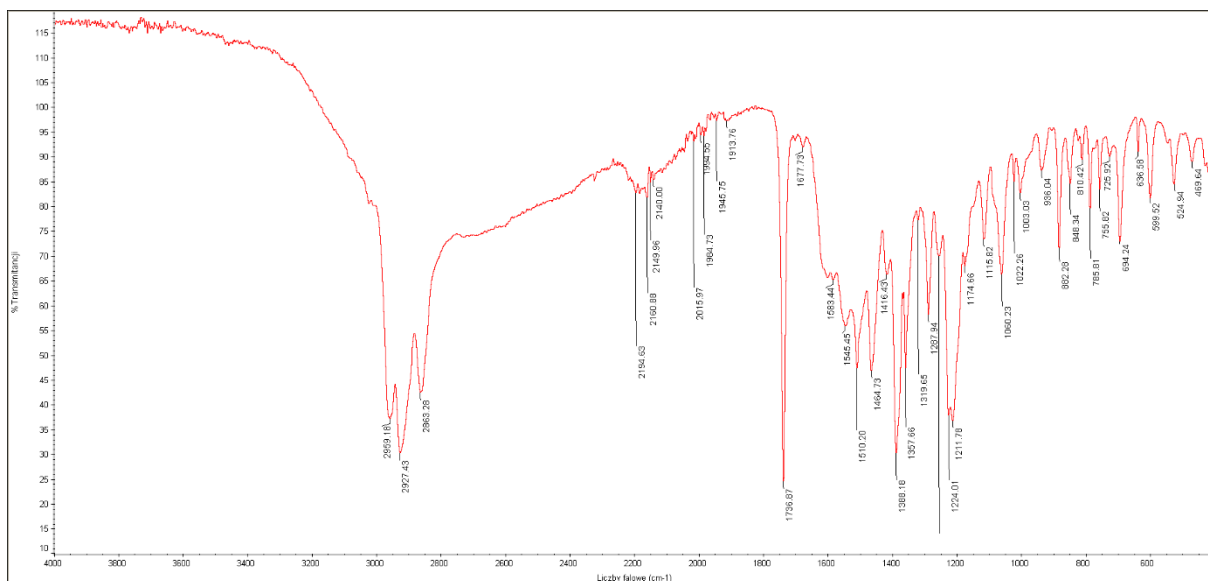

**Figure S32.** FT-IR spectra of L-valine heptyl ester ibuprofenate

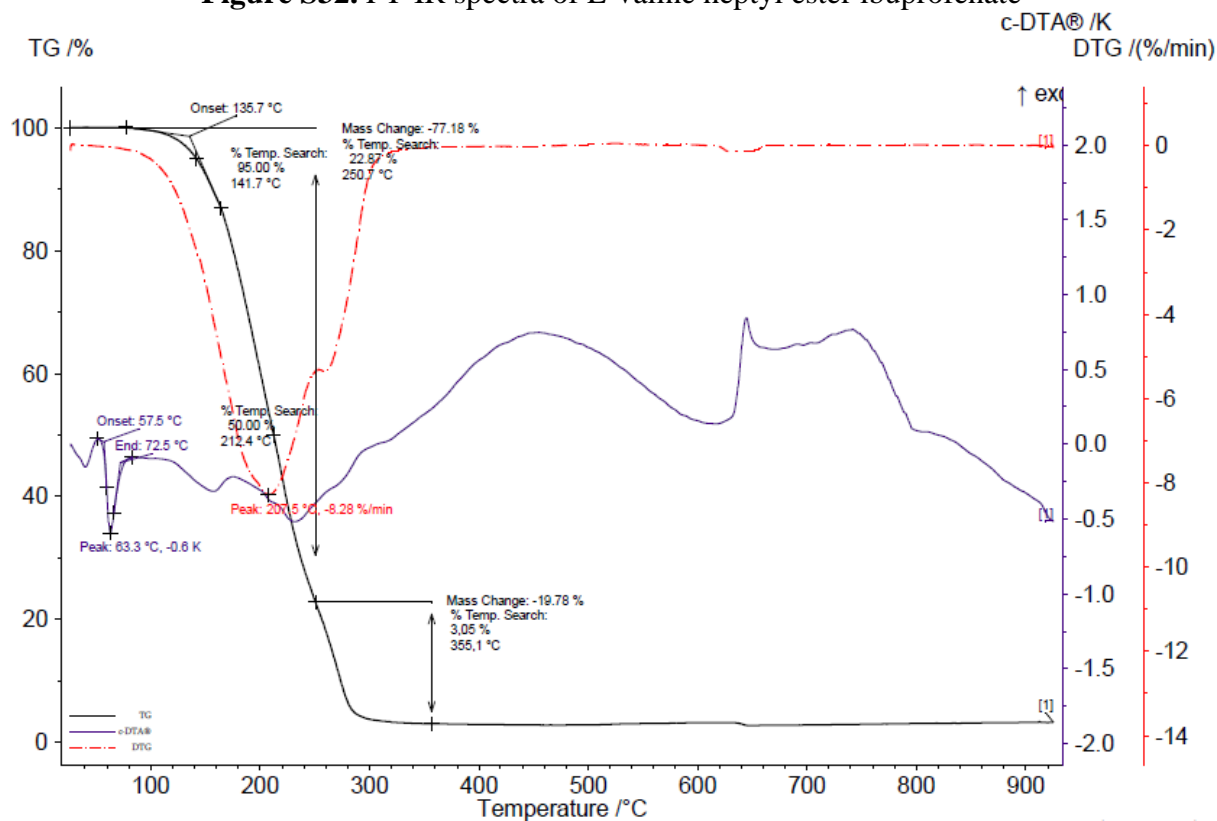

**Figure S33.** The TG, DTG and c-DTA curves of L-valine heptyl ester ibuprofenate

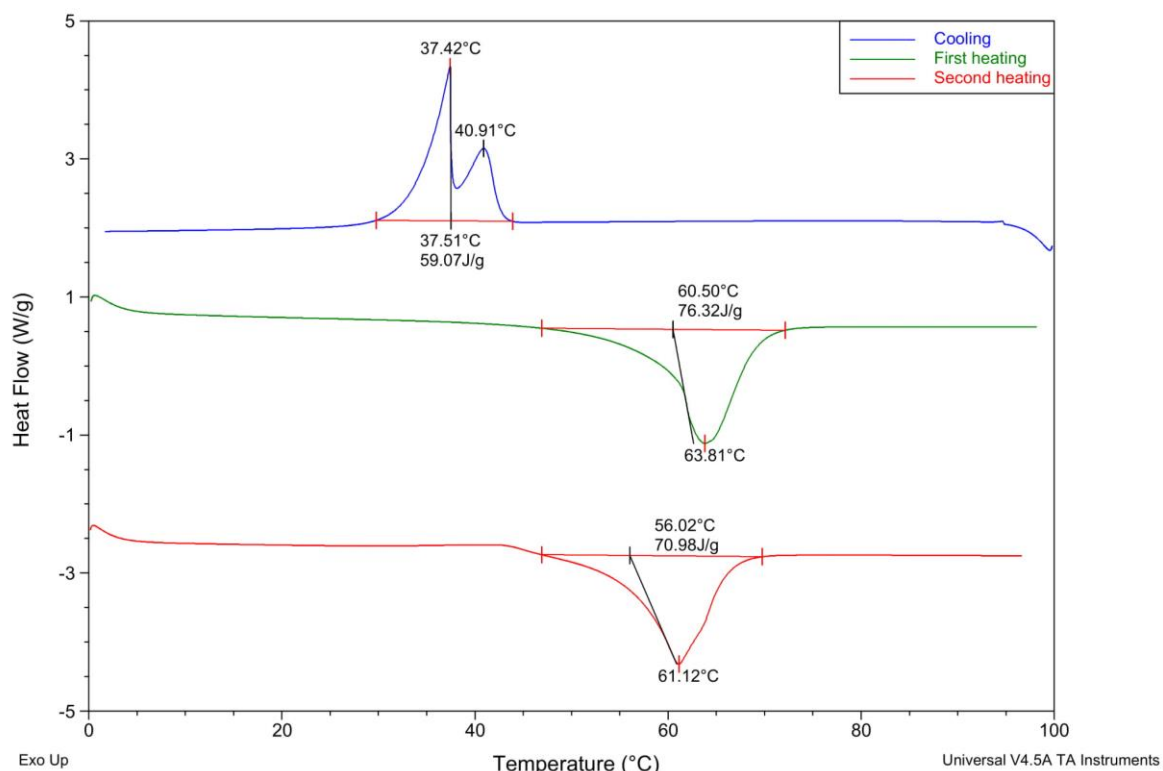

**Figure S34.** The DSC curves of L-valine heptyl ester ibuprofenate

### [ValOOct][IBU] – L-valine octyl ester ibuprofenate

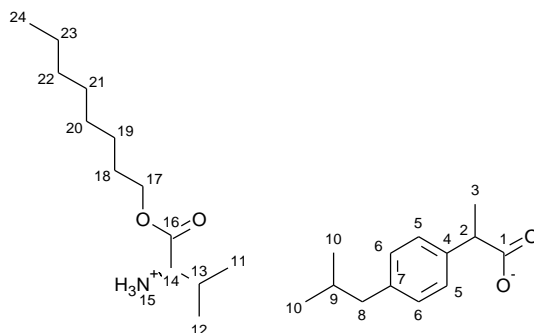

The compound was obtained according to general procedure and the reaction yielded 0.6 g of [L-ValOOct][IBU] (98.0%) as white solid. **<sup>1</sup>H NMR** (400 MHz, CDCl<sub>3</sub>)  $\delta$  in ppm: 7.20 (d, 2H,  $J_{5,6}=8.91$  Hz, H<sub>5</sub>); 7.05 (d, 2H,  $J_{6,5}=8.0$  Hz, H<sub>6</sub>); 6.03 (s, 3H, H<sub>15</sub>); 4.06-4.14 (m, 2H, H<sub>17</sub>); 3.60- 3.65 (q, 1H, H<sub>2</sub>); 3.39 (d, 1H,  $J_{14,13}=4.5$  Hz, H<sub>14</sub>); 2.42 (d, 2H,  $J_{8,9}=7.2$  Hz, H<sub>8</sub>); 2.03-2.08 (m, 1H, H<sub>13</sub>); 1.80-1.87 (m, 1H, H<sub>9</sub>); 1.59-1.64 (m, 2H, H<sub>18</sub>); 1.43 (d, 3H,  $J_{3,2}=7.1$  Hz, H<sub>3</sub>); 1.27-1.30 (m, 11H, H<sub>19</sub>, H<sub>20</sub>, H<sub>21</sub>, H<sub>22</sub>, H<sub>23</sub>); 0.87-0.94 (m, 15H, H<sub>10</sub>, H<sub>11</sub>, H<sub>12</sub>, H<sub>24</sub>); **<sup>13</sup>C NMR** (100 MHz, CDCl<sub>3</sub>)  $\delta$  in ppm: 179.22 (C<sub>1</sub>); 173.98 (C<sub>16</sub>); 140.17 (C<sub>7</sub>); 138.52 (C<sub>4</sub>); 129.19 (C<sub>5</sub>); 127.27 (C<sub>6</sub>); 65.27 (C<sub>17</sub>); 59.00 (C<sub>14</sub>); 45.71 (C<sub>8</sub>); 45.08 (C<sub>2</sub>); 31.79 (C<sub>13</sub>); 31.48 (C<sub>18</sub>); 30.20 (C<sub>9</sub>); 29.17 (C<sub>19</sub>); 28.57 (C<sub>20</sub>); 25.89 (C<sub>21</sub>); 22.65 (C<sub>22</sub>); 22.42 (C<sub>10</sub>); 18.78 (C<sub>12</sub>); 18.55 (C<sub>3</sub>); 17.30 (C<sub>11</sub>); 14.11 (C<sub>11</sub>); **FT-IR:**  $\nu$  (ATR): 2955; 2923; 2855; 2722; 2162; 1739; 1678; 1603; 1510; 1464; 1417; 1388; 1359; 1320; 1288; 1259; 1223;

1209; 1176; 1115; 1082; 1058; 1022; 1004; 940; 882; 848; 812; 786; 726; 693; 637 $\text{cm}^{-1}$ ; **UV-Vis** (EtOH):  $\lambda_{\text{max}}=219.8$  nm; **Elemental analysis:** Calc. (%) for  $\text{C}_{24}\text{H}_{41}\text{NO}_4$  (435.645 g/mol) C (71.68), H (10.41), N (3.21), O (14.69), Found C (71.64), H (10.43), N (3.08), O (14.63);  $T_m=58.2-70.9^\circ\text{C}$ ;  $[\alpha]_{\text{D}}^{20} = +8.300$  (c=0.506 g/100  $\text{cm}^3$  EtOH).

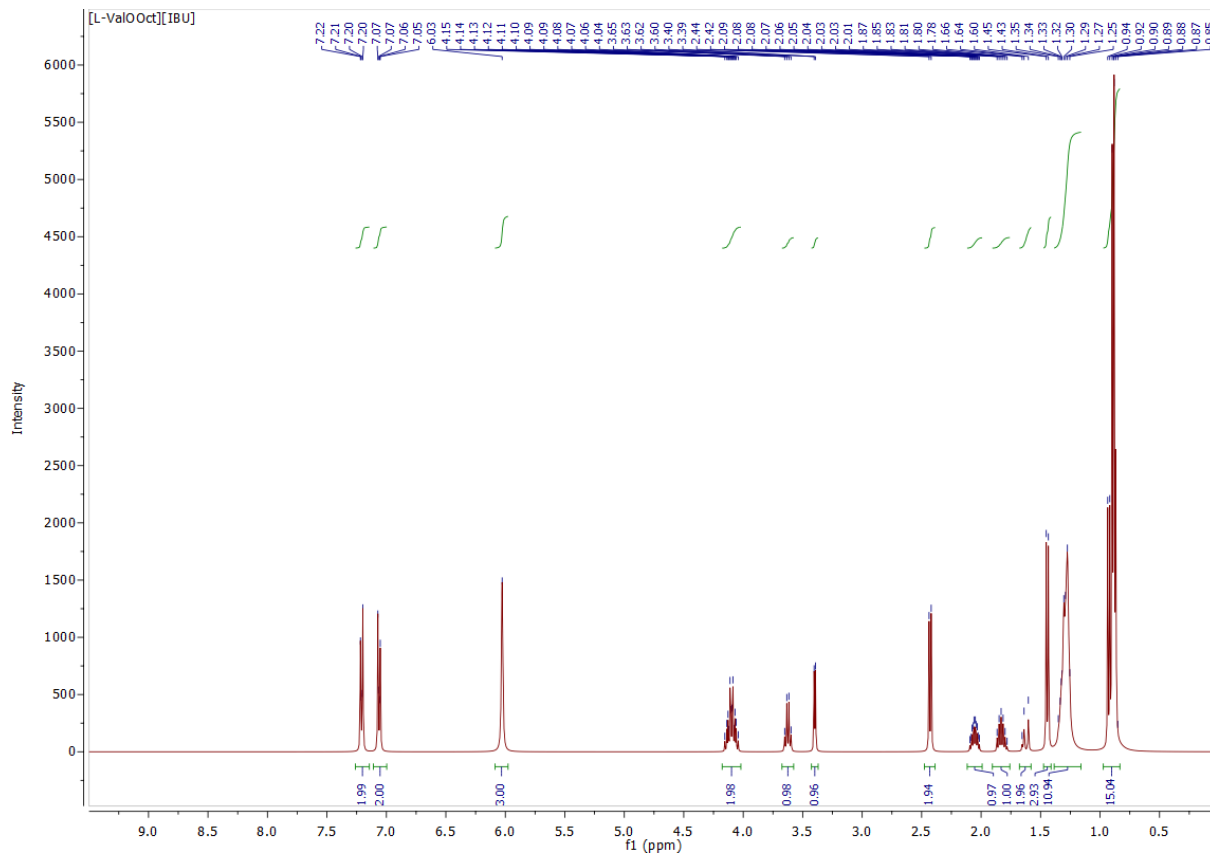

**Figure S35.**  $^1\text{H}$  NMR spectra of L-valine octyl ester ibuprofenate

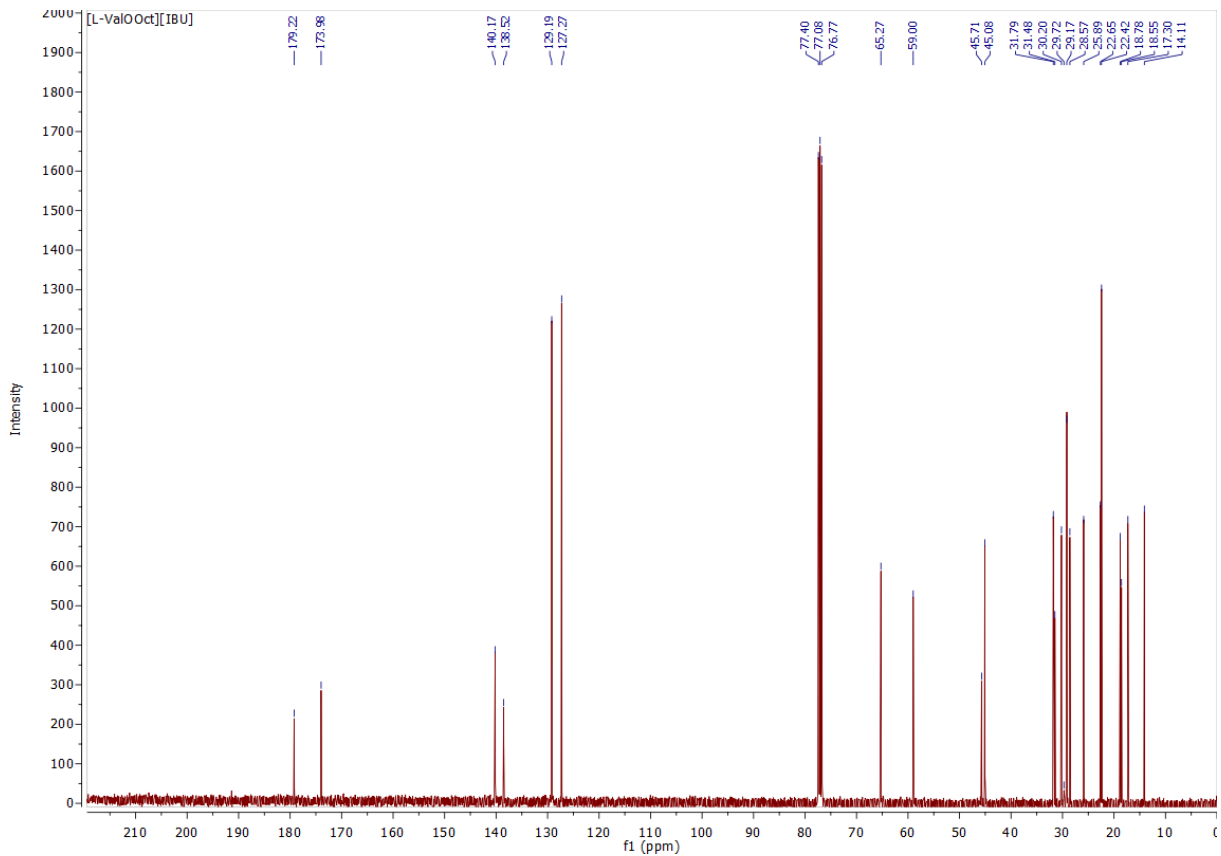

**Figure S36.**  $^{13}\text{C}$  NMR spectra of L-valine octyl ester ibuprofenate

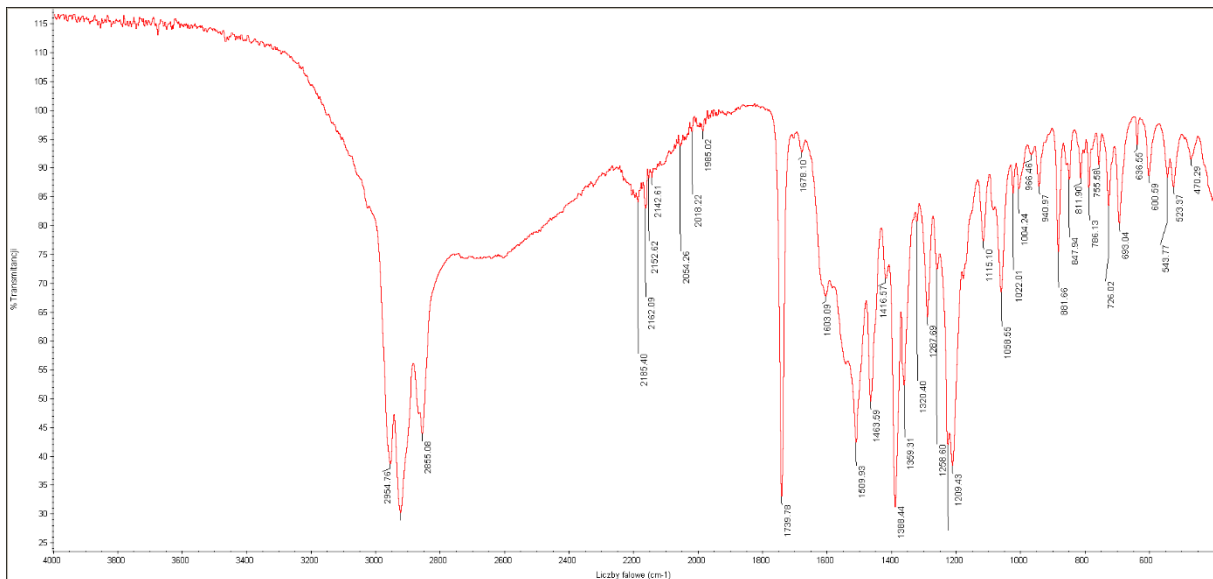

**Figure S37.** FT-IR spectra of L-valine octyl ester ibuprofenate

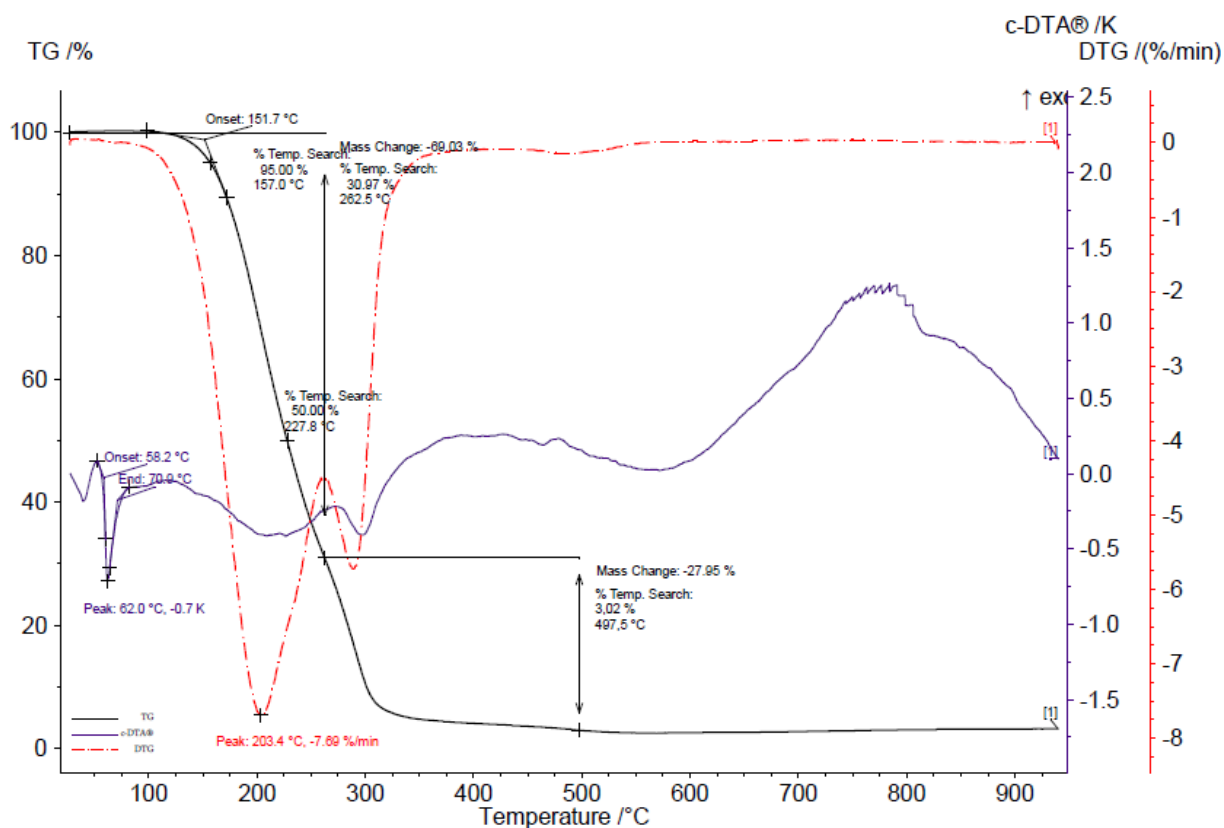

**Figure S38.** The TG, DTG and c-DTA curves of L-valine octyl ester ibuprofenate

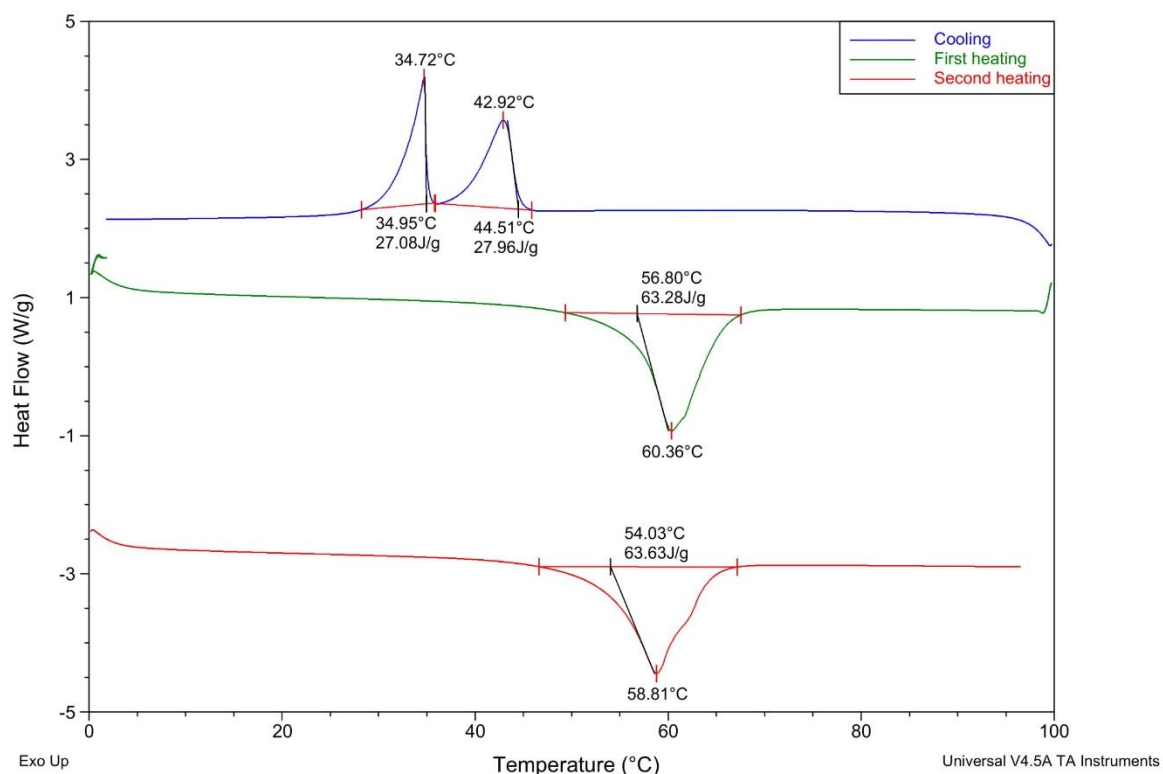

**Figure S39.** The DSC curves of L-valine octyl ester ibuprofenate

## COLLECTED DATA

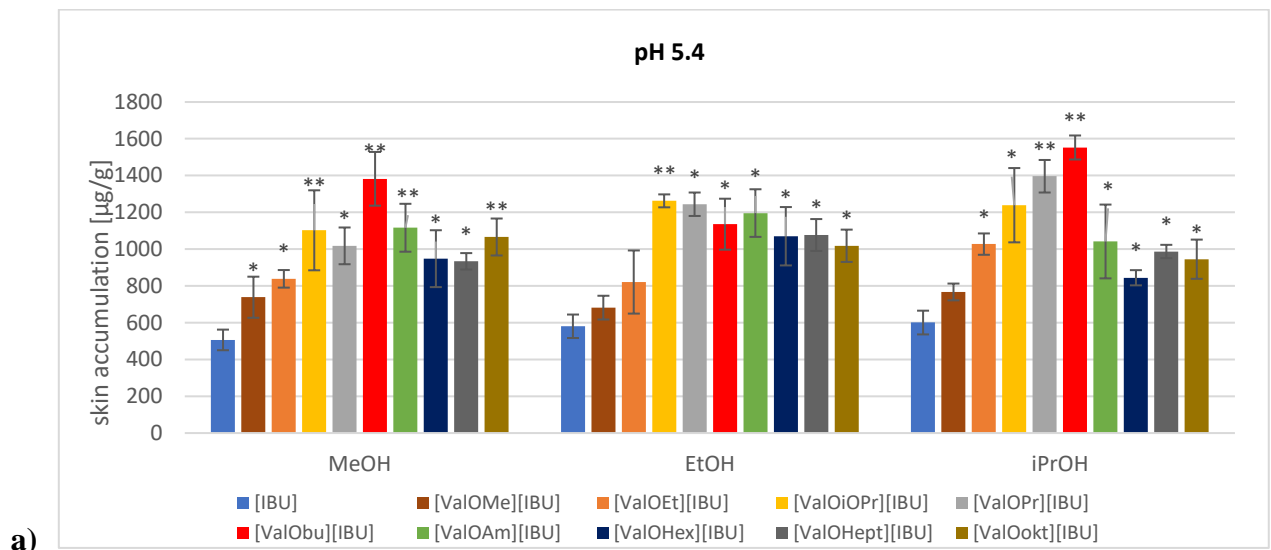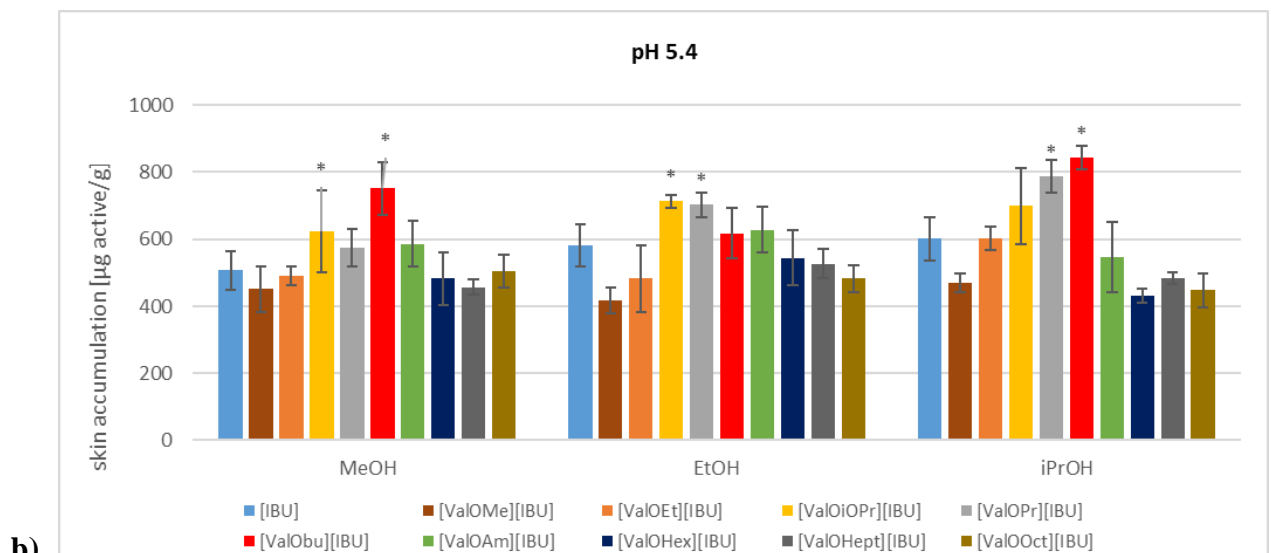

**Figure S40.** The cumulative mass of compound in skin after 24 hours of permeation ( $n=3$ ) - acceptor phase with pH 5.4, expressed as  $\mu\text{g}$  compound (a) or  $\mu\text{g}$  IBU (b) per g skin

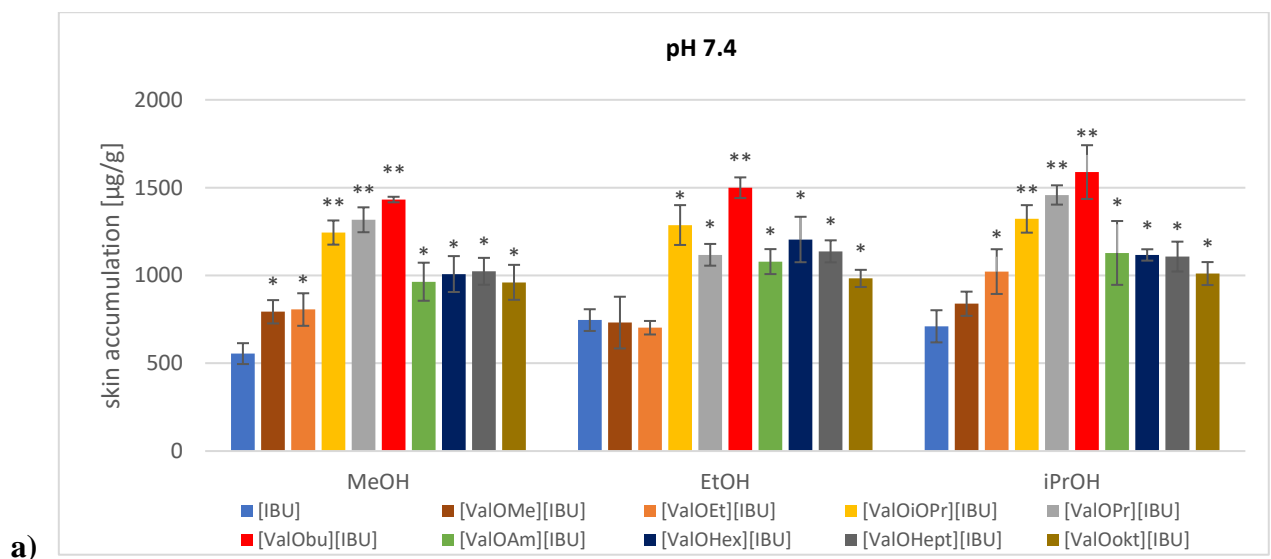

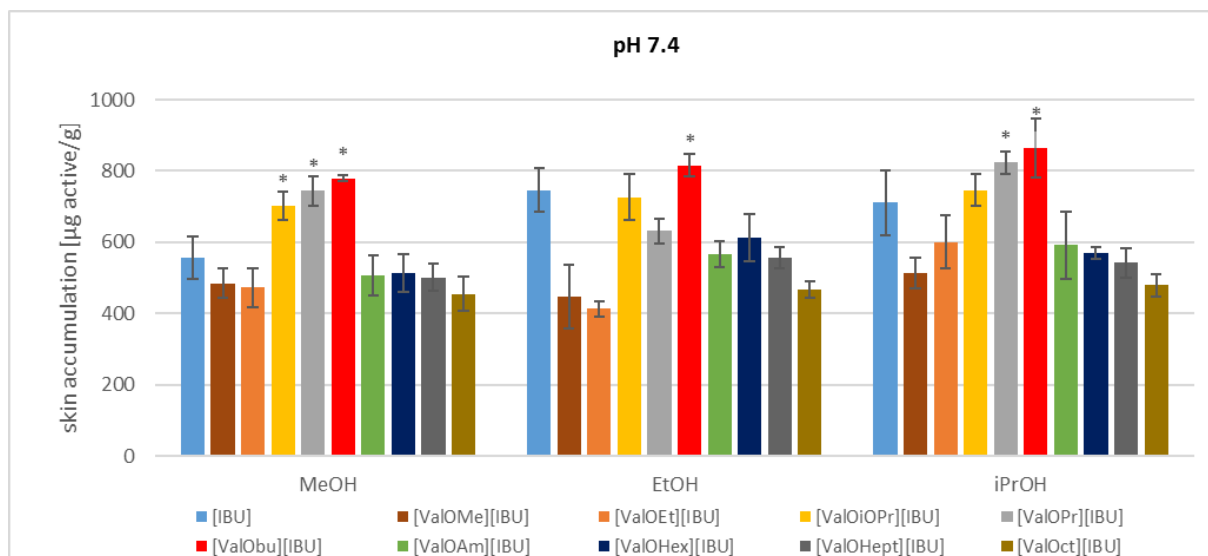

b)

**Figure S41.** The cumulative mass of compound in skin after 24 hours of permeation (n=3) - acceptor phase with pH 7.4, expressed as µg compound (a) or µg IBU (b) per g skin



**Table S4.** Statistical differences regarding the cumulative mass of active substance in relation to ibuprofen, taking into account all factors used (a type of alcohol and pH) by the Mann-Whitney test

| Compounds | [ValOMe]<br>[IBU]      | [ValOEt]<br>[IBU]      | [ValOiPr]<br>[IBU]    | [ValOPr]<br>[IBU]       | [ValOBu]<br>[IBU]     | [ValOAm]<br>[IBU]     | [ValOHex]<br>[IBU]   | [ValOHept]<br>[IBU]    | [ValOOct]<br>[IBU]     |
|-----------|------------------------|------------------------|-----------------------|-------------------------|-----------------------|-----------------------|----------------------|------------------------|------------------------|
| IBU       | z=- 0.616<br>(p=0.542) | z=4.192<br>(p=0.000)** | z=-0.933<br>(p=0.350) | z=-3.306<br>(p=0.000)** | z=-0.616<br>(p=0.537) | z=-1.597<br>(p=0.110) | z=2.167<br>(p=0.030) | z=4.167<br>(p=0.000)** | z=5.110<br>(p=0.000)** |

\*\*Value is significantly different from control (ibuprofen) (P<0.001) \*Value is significantly different from control (ibuprofen) (P<0.05)

**Table S5.** Statistical differences between individual alcohols and between acceptor liquids with different pH using the Mann-Whitney test

| Alcohol/vehicle    | z      | p        |
|--------------------|--------|----------|
| EtOH vs MeOH       | 2.367  | 0.0179*  |
| EtOH vs iPrOH      | -2.130 | 0.0330*  |
| MeOH vs iPrOH      | -4.273 | 0.0000** |
| pH/ acceptor fluid |        |          |
| pH 7.4 vs pH 5.4   | 3.1942 | 0.0014** |

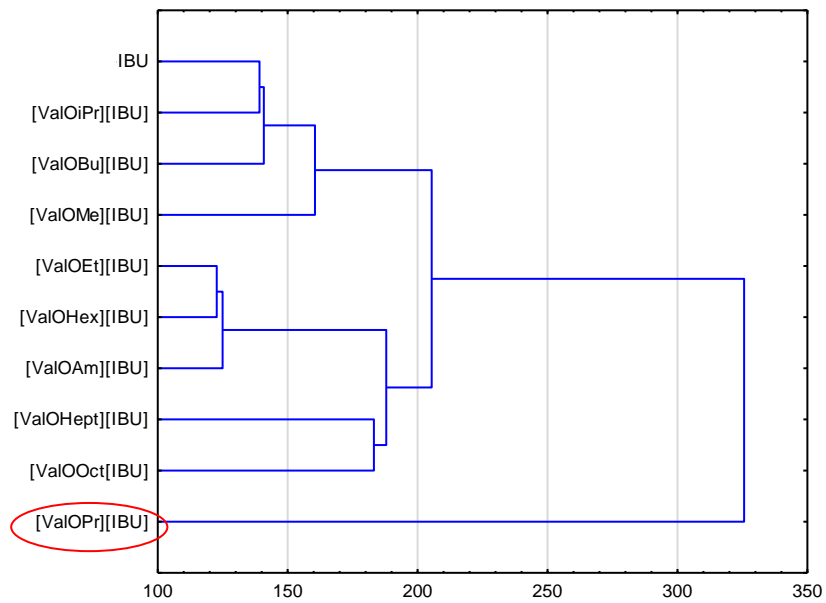

**Figure S42.** Hierarchical dendrogram of a mean cumulated mass of IBU

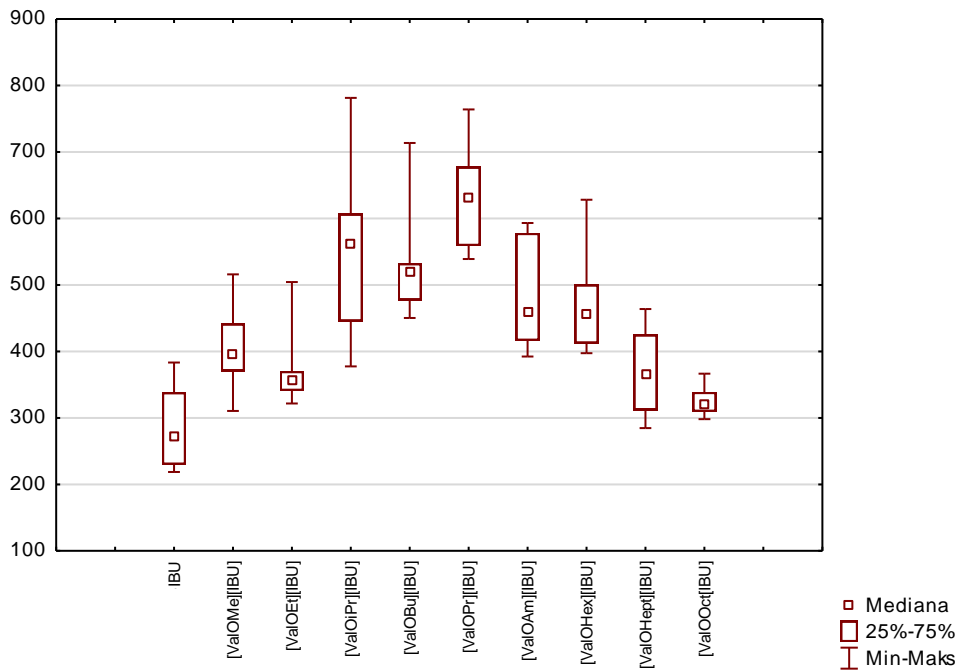

**Figure S43.** Box and whisker plot of data from a mean cumulative mass of IBU depending on the type of ibuprofen derivative used

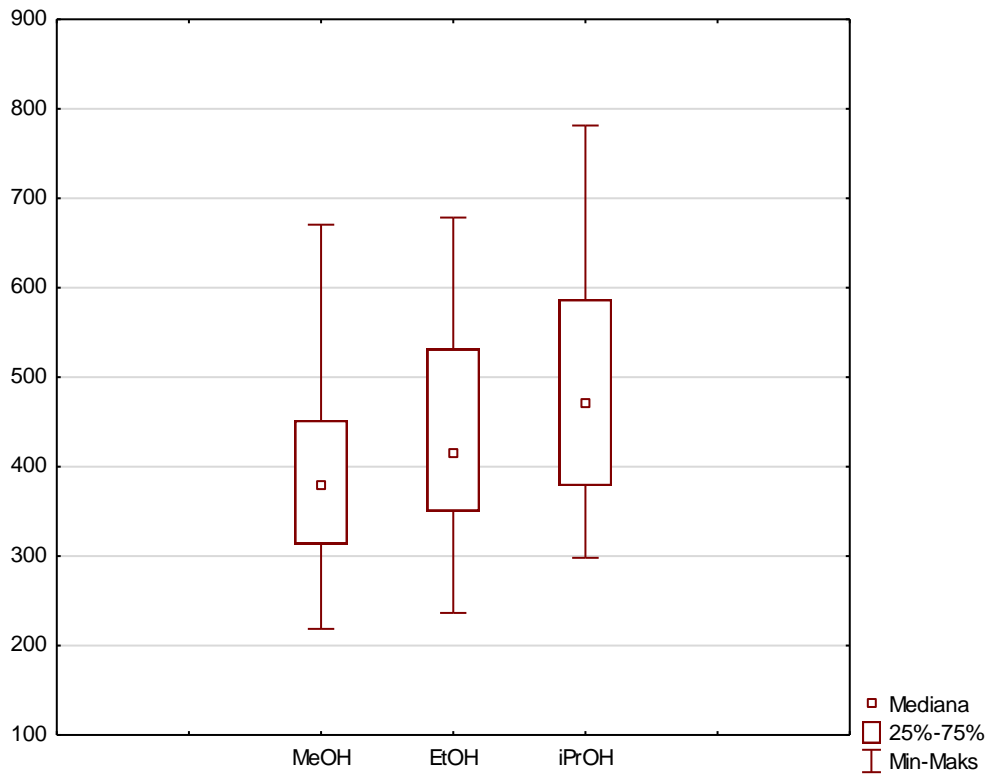

**Figure S44.** Box and whisker plot of data from a mean cumulative mass of IBU depending on the type vehicles used

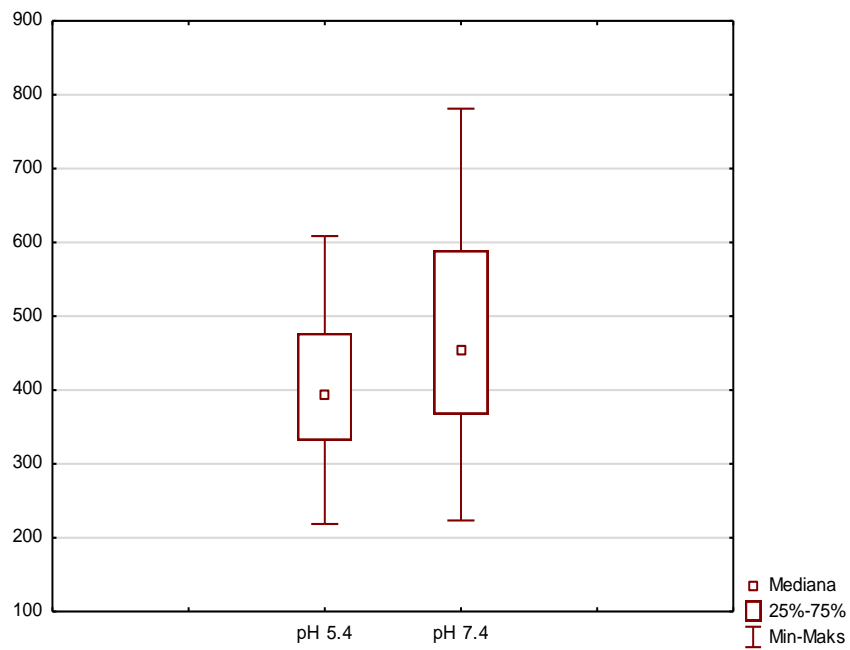

**Figure S45.** Box and whisker plot of data from a mean cumulative mass of IBU depending on the pH used

**Table S6.** Skin permeation expressed as % applied dose of IBU, after 24 h permeation of free acid and its salts with L-valine esters from methanolic, ethanolic and isopropanolic solution into acceptor phase at pH 7.4 and 5.4

| Compound        | Skin permeation, % applied dose of IBU |                    |       |        |       |       |
|-----------------|----------------------------------------|--------------------|-------|--------|-------|-------|
|                 | pH 7.4                                 |                    |       | pH 5.4 |       |       |
|                 | MeOH                                   | EtOH               | iPrOH | MeOH   | EtOH  | iPrOH |
| IBU             | 4.59                                   | 6.06 <sup>a</sup>  | 7.60  | 4.38   | 4.81  | 6.72  |
| [ValOMe][IBU]   | 7.41                                   | 8.23               | 9.50  | 6.45   | 7.70  | 8.69  |
| [ValOEt][IBU]   | 6.84                                   | 7.33 <sup>a</sup>  | 9.59  | 6.94   | 6.48  | 7.38  |
| [ValOiPr][IBU]  | 10.51                                  | 12.09 <sup>a</sup> | 14.56 | 7.61   | 10.51 | 12.49 |
| [ValOPr][IBU]   | 13.23                                  | 13.55 <sup>a</sup> | 14.59 | 12.13  | 11.10 | 10.89 |
| [ValOBu][IBU]   | 9.57                                   | 10.66 <sup>a</sup> | 13.68 | 9.15   | 10.31 | 10.51 |
| [ValOAm][IBU]   | 9.38                                   | 11.79 <sup>a</sup> | 11.53 | 7.92   | 8.06  | 8.94  |
| [ValOHex][IBU]  | 8.61                                   | 9.81 <sup>a</sup>  | 12.53 | 8.09   | 8.50  | 9.65  |
| [ValOHept][IBU] | 6.36                                   | 8.57               | 8.09  | 5.88   | 7.14  | 7.43  |
| [ValOOct][IBU]  | 6.36                                   | 6.85               | 6.51  | 6.31   | 6.42  | 6.27  |

**a** – data reported in (Janus et al., 2020)

**Table S7.** Skin accumulation expressed as % applied dose of IBU, after 24 h skin permeation of ibuprofen free acid and its salts with L-valine esters from methanolic, ethanolic and isopropanolic solution into acceptor fluid at pH 7.4 and 5.4

| Compound        | Skin accumulation, % applied dose of IBU |      |       |        |      |       |
|-----------------|------------------------------------------|------|-------|--------|------|-------|
|                 | pH 7.4                                   |      |       | pH 5.4 |      |       |
|                 | MeOH                                     | EtOH | iPrOH | MeOH   | EtOH | iPrOH |
| IBU             | 2.62                                     | 3.05 | 3.05  | 2.27   | 2.27 | 3.10  |
| [ValOMe][IBU]   | 3.17                                     | 3.00 | 3.00  | 2.97   | 2.97 | 3.24  |
| [ValOEt][IBU]   | 3.61                                     | 3.45 | 3.45  | 3.62   | 3.62 | 4.74  |
| [ValOiPr][IBU]  | 5.03                                     | 5.63 | 5.63  | 5.45   | 5.45 | 6.52  |
| [ValOPr][IBU]   | 5.83                                     | 5.02 | 5.02  | 5.08   | 5.08 | 5.92  |
| [ValOBu][IBU]   | 6.32                                     | 6.75 | 6.75  | 6.38   | 6.38 | 6.43  |
| [ValOAm][IBU]   | 4.76                                     | 4.80 | 4.80  | 5.71   | 5.71 | 4.95  |
| [ValOHex][IBU]  | 4.55                                     | 4.73 | 4.73  | 4.34   | 4.34 | 4.56  |
| [ValOHept][IBU] | 4.21                                     | 4.56 | 4.56  | 4.14   | 4.14 | 4.12  |
| [ValOOct][IBU]  | 3.96                                     | 4.07 | 4.07  | 4.43   | 4.43 | 3.92  |

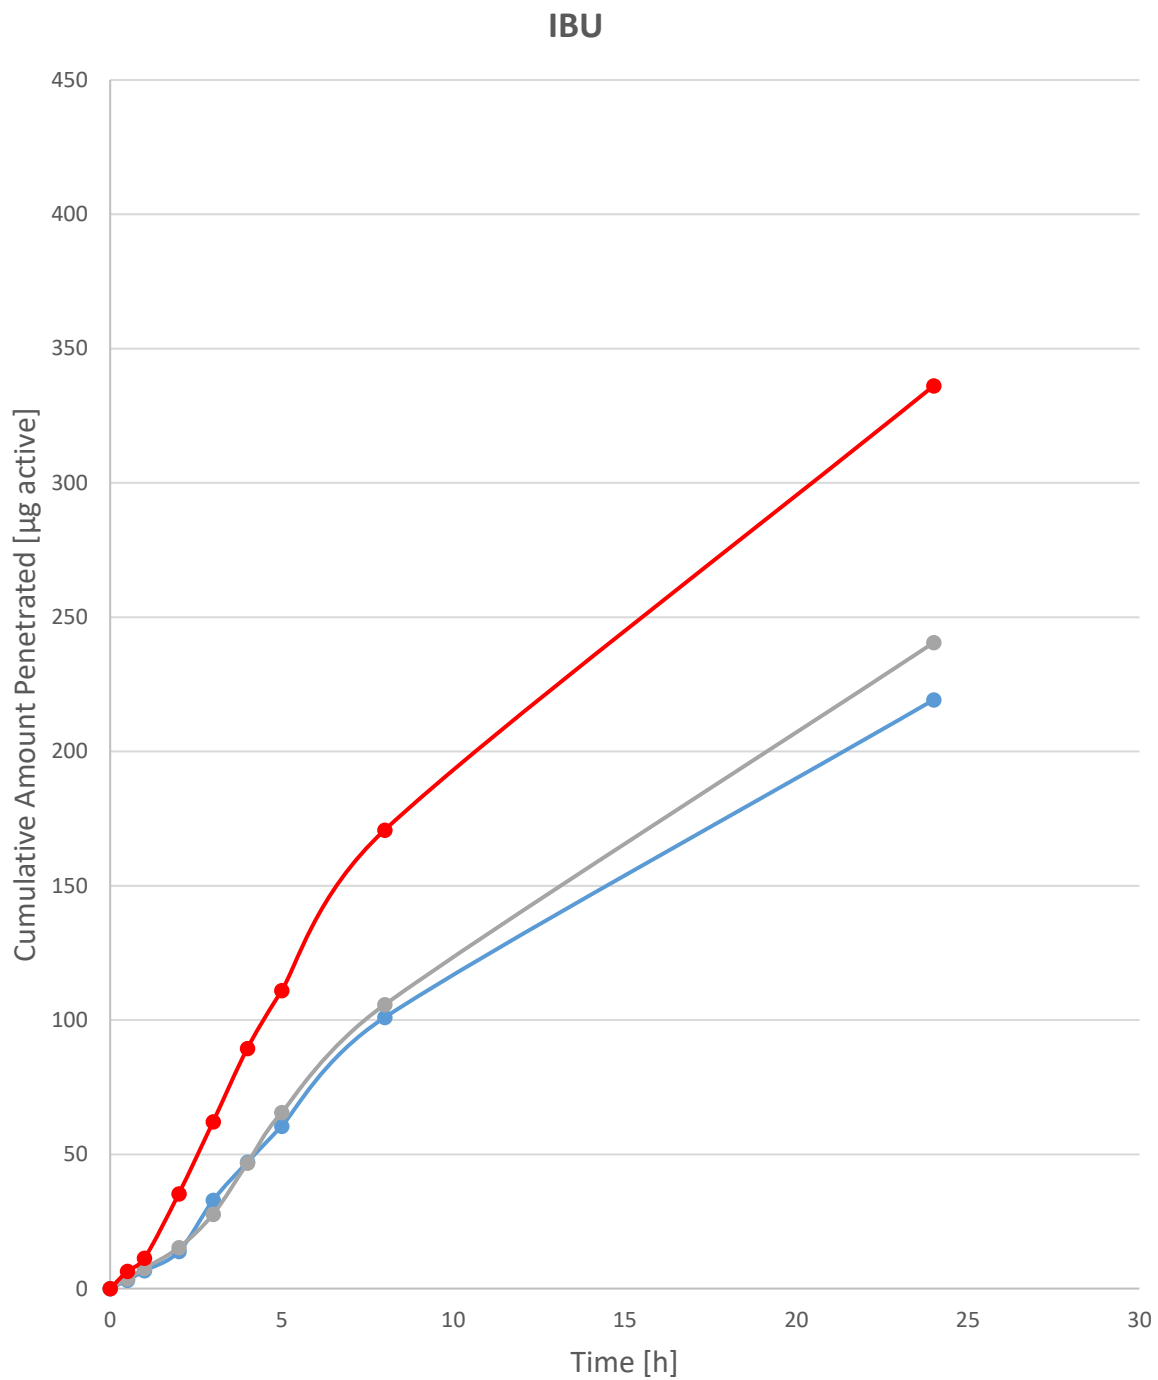

**Figure S46.** IBU diffusing through pig skin from alcoholic solutions (blue – methanolic; gray – ethanolic; red – isopropanolic) to acceptor phase with pH 5.4

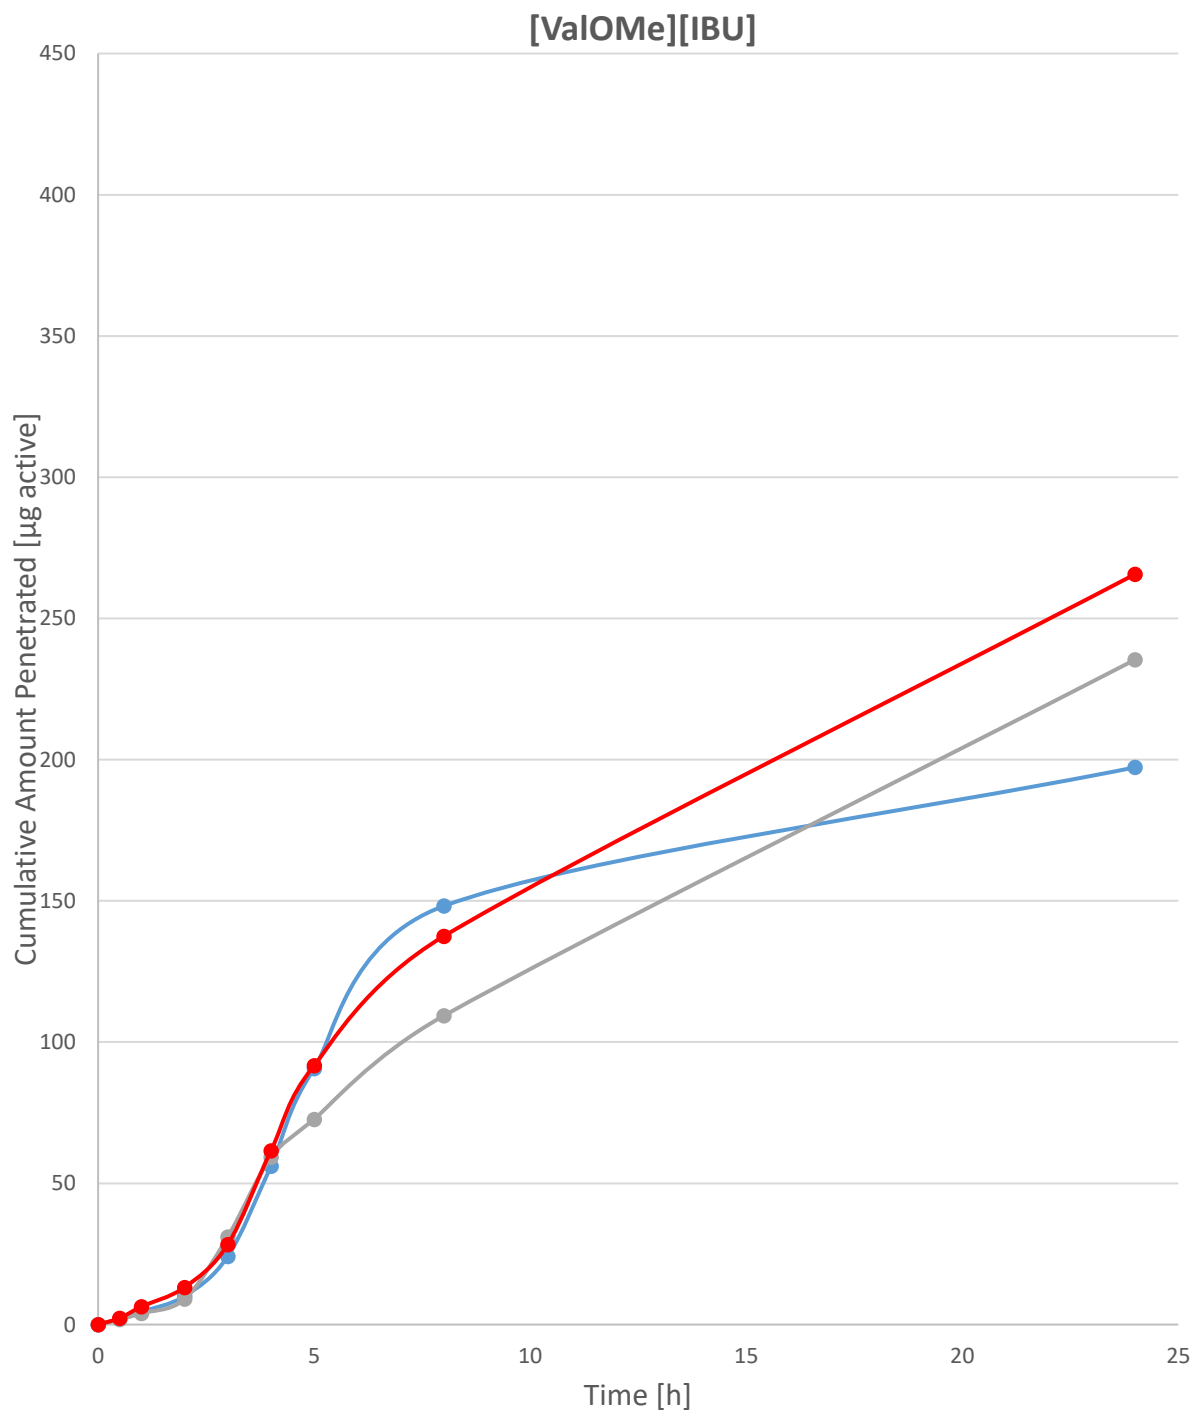

**Figure S47.** [ValOMe][IBU] diffusing through pig skin from alcoholic solution (blue – methanolic; gray – ethanolic; red – isopropanolic) to acceptor phase with pH 5.4

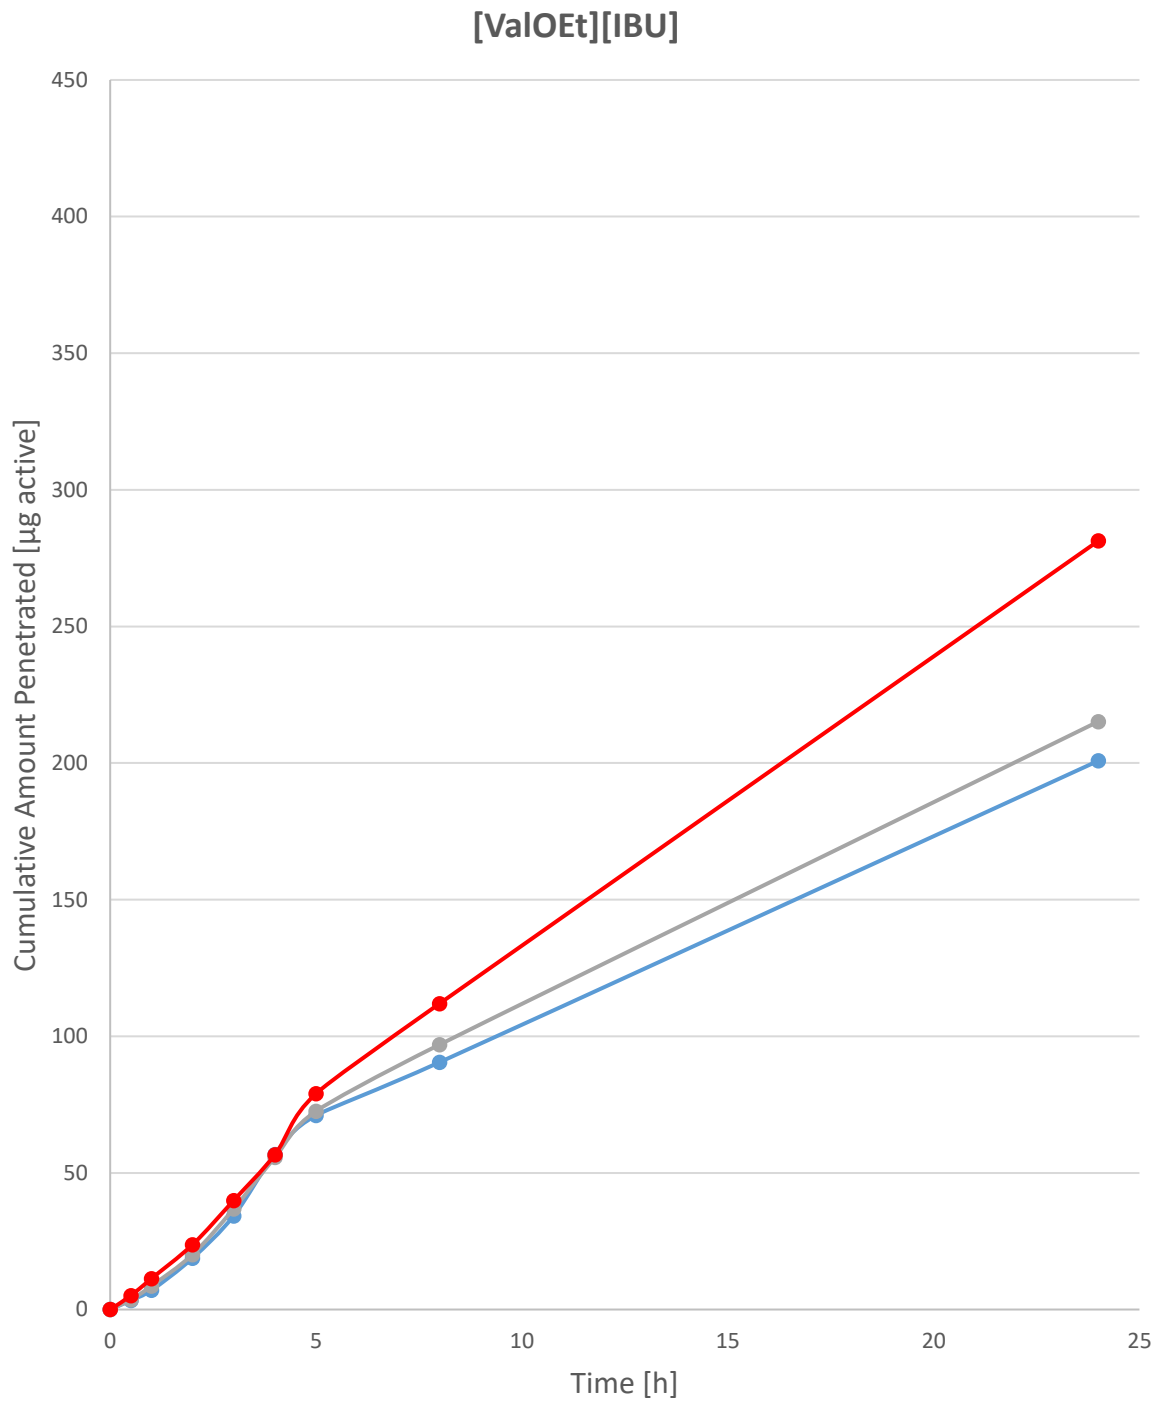

**Figure S48.** [ValOEt][IBU] diffusing through pig skin from alcoholic solution (blue – methanolic; gray – ethanolic; red – isopropanolic) to acceptor phase with pH 5.4

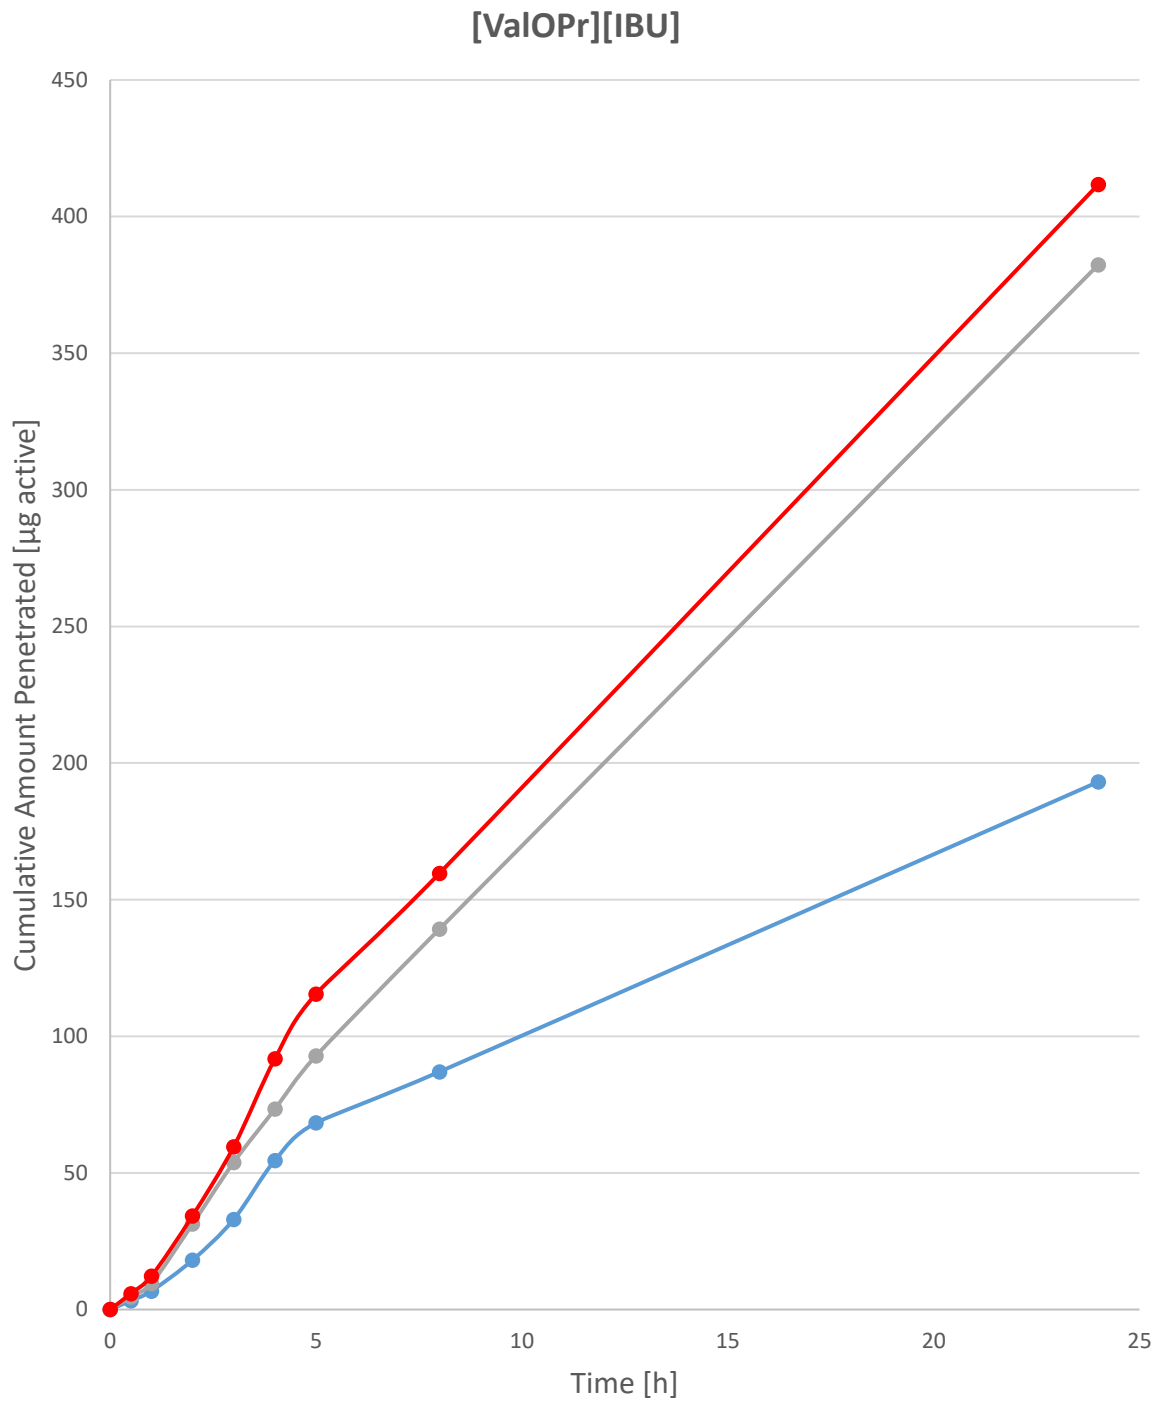

**Figure S49.** [ValOPr][IBU] diffusing through pig skin from alcoholic solution (blue – methanolic; gray – ethanolic; red – isopropanolic) to acceptor phase with pH 5.4



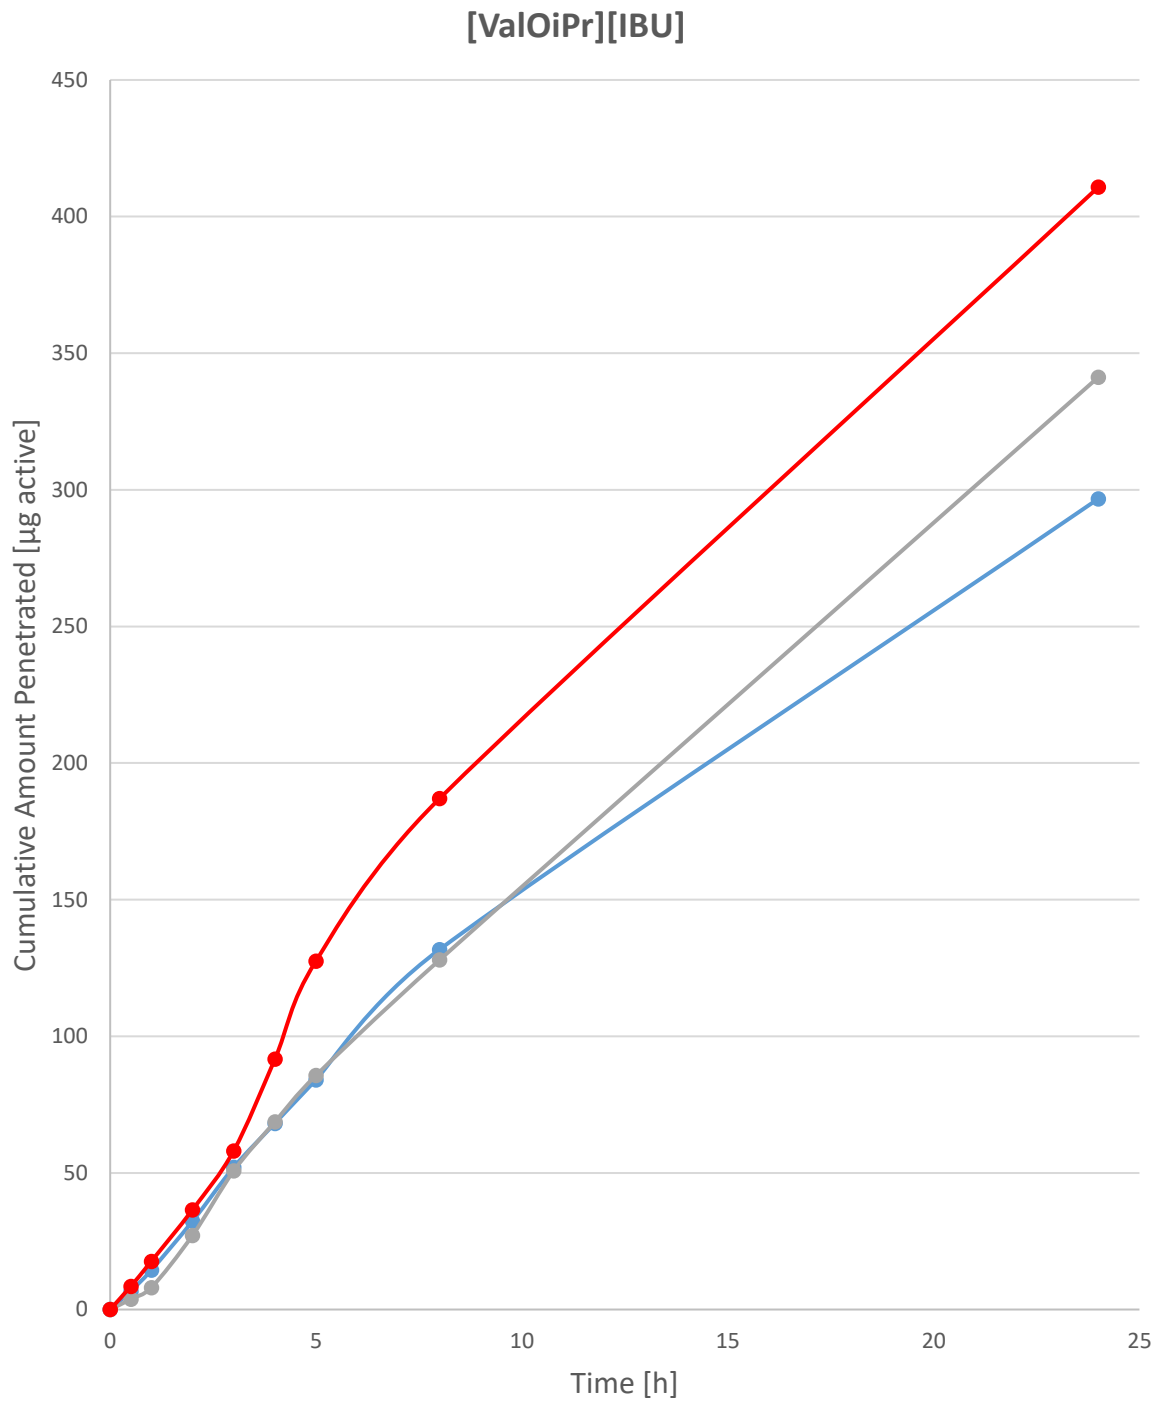

**Figure S50.** [ValOiPr][IBU] diffusing through pig skin from alcoholic solution (blue – methanolic; gray – ethanolic; red – isopropanolic) to acceptor phase with pH 5.4

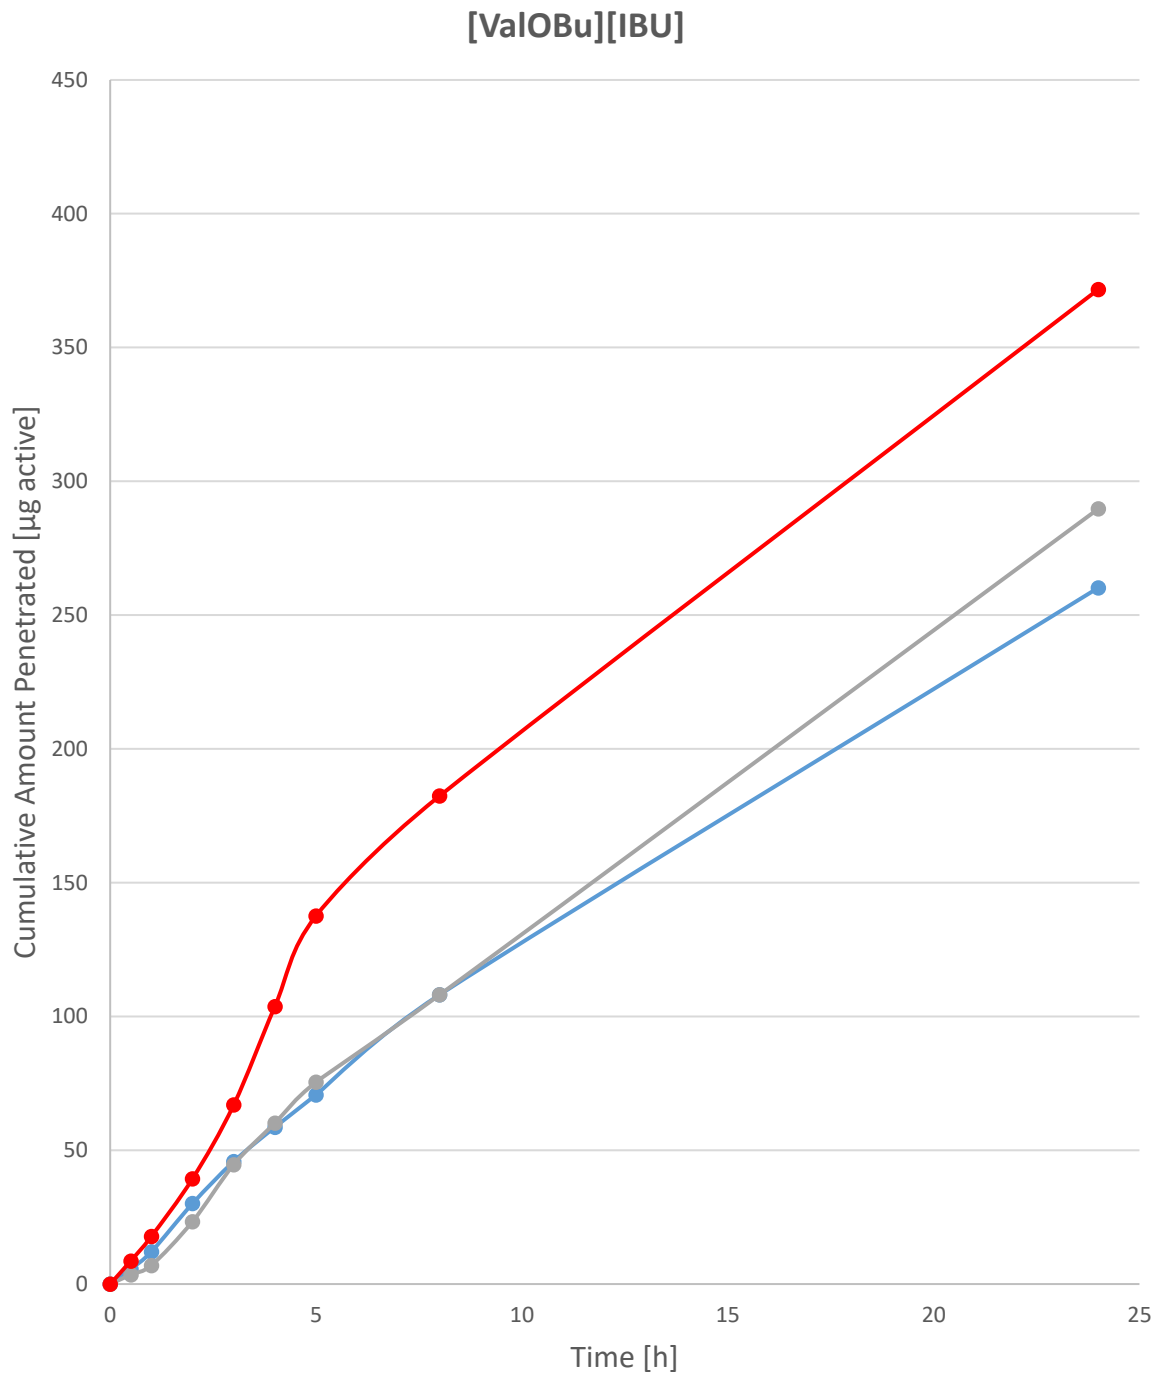

**Figure S51.** [ValOBu][IBU] diffusing through pig skin from alcoholic solution (blue – methanolic; gray – ethanolic; red – isopropanolic) to acceptor phase with pH 5.4

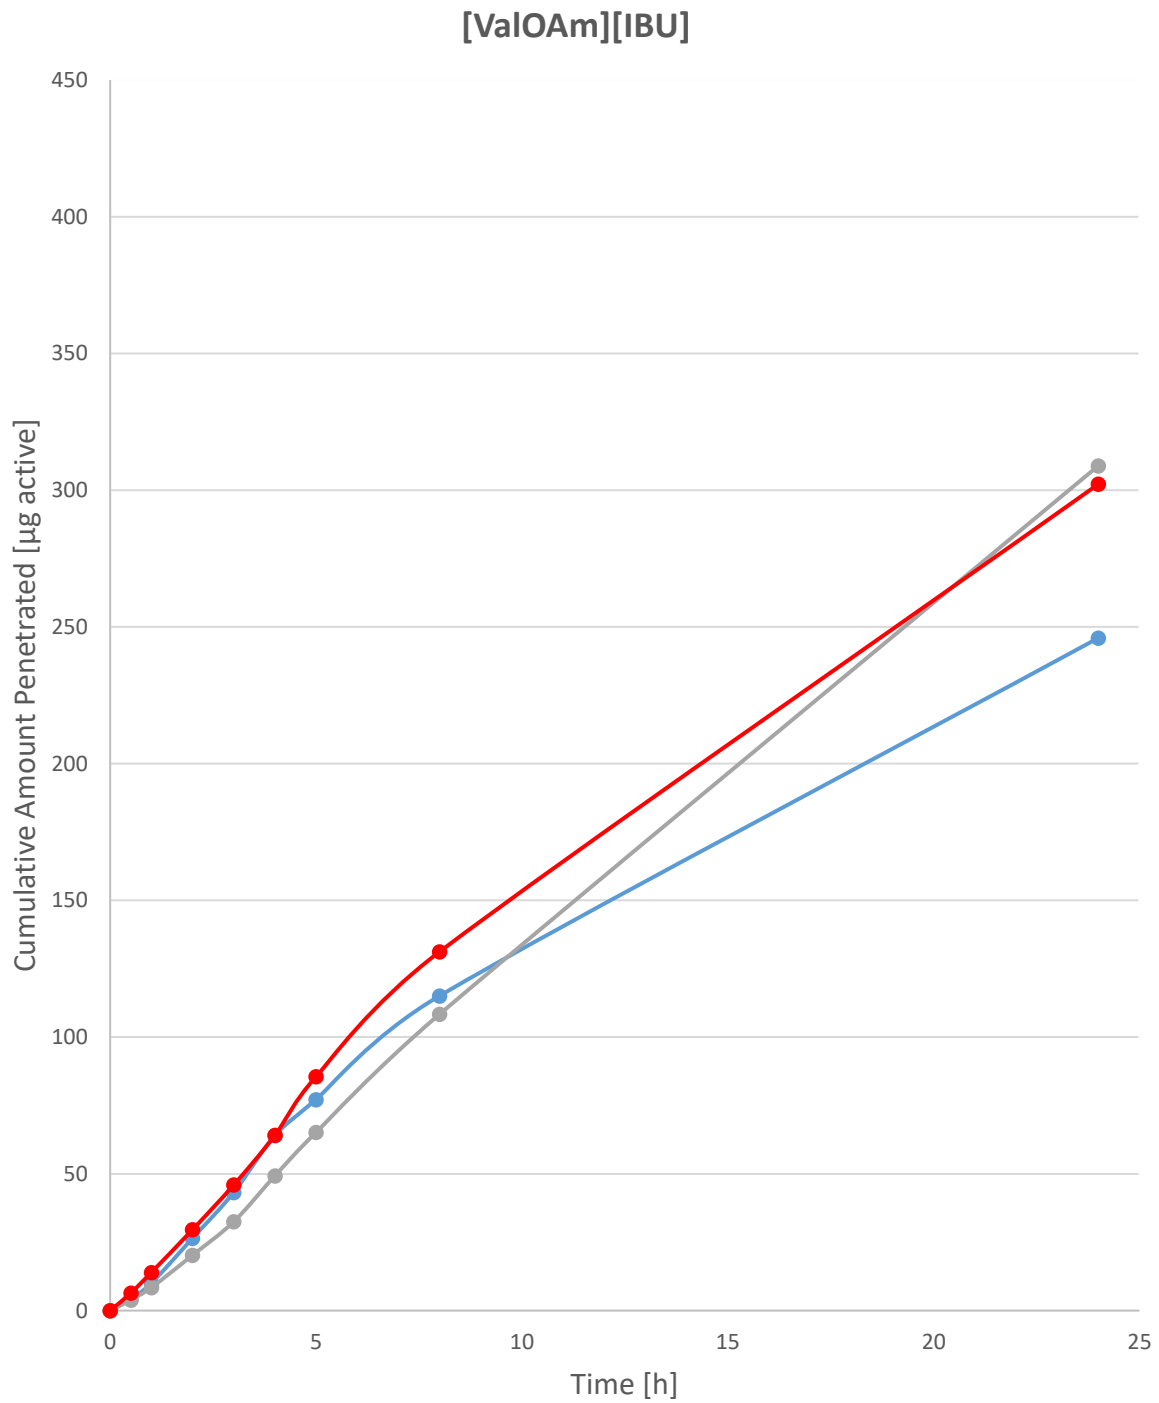

**Figure S52.** [ValOAm][IBU] diffusing through pig skin from alcoholic solution (blue – methanolic; gray – ethanolic; red – isopropanolic) to acceptor phase with pH 5.4

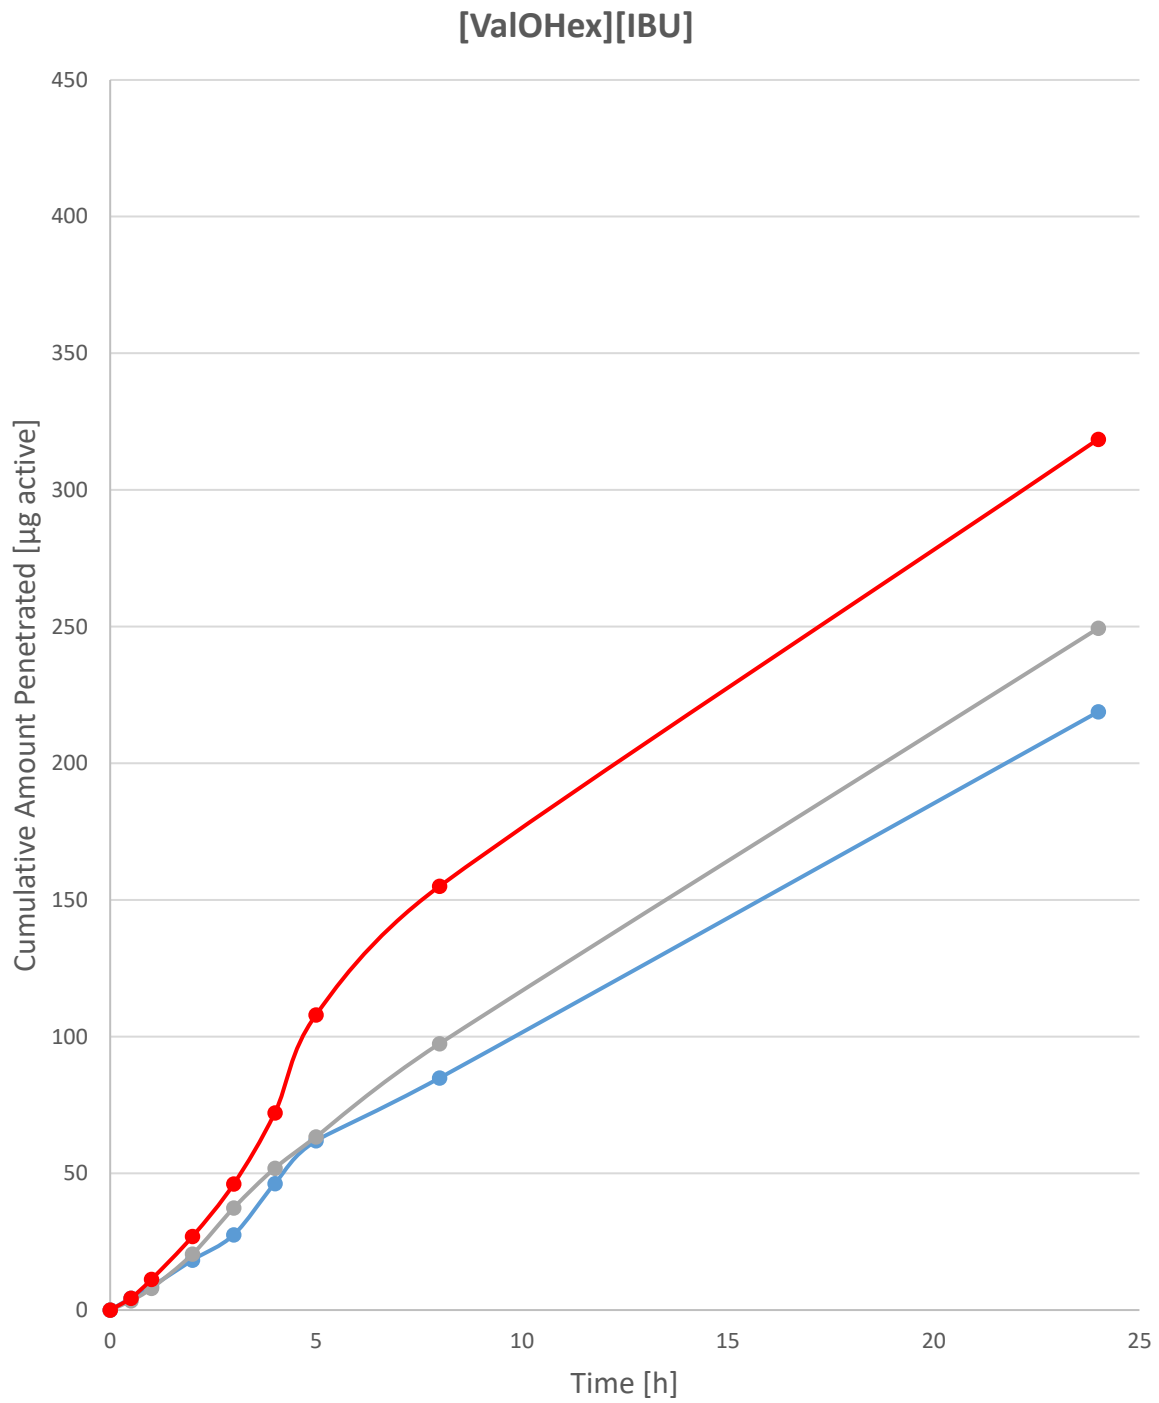

**Figure S53.** [ValOHex][IBU] diffusing through pig skin from alcoholic solution (blue – methanolic; gray – ethanolic; red – isopropanolic) to acceptor phase with pH 5.4

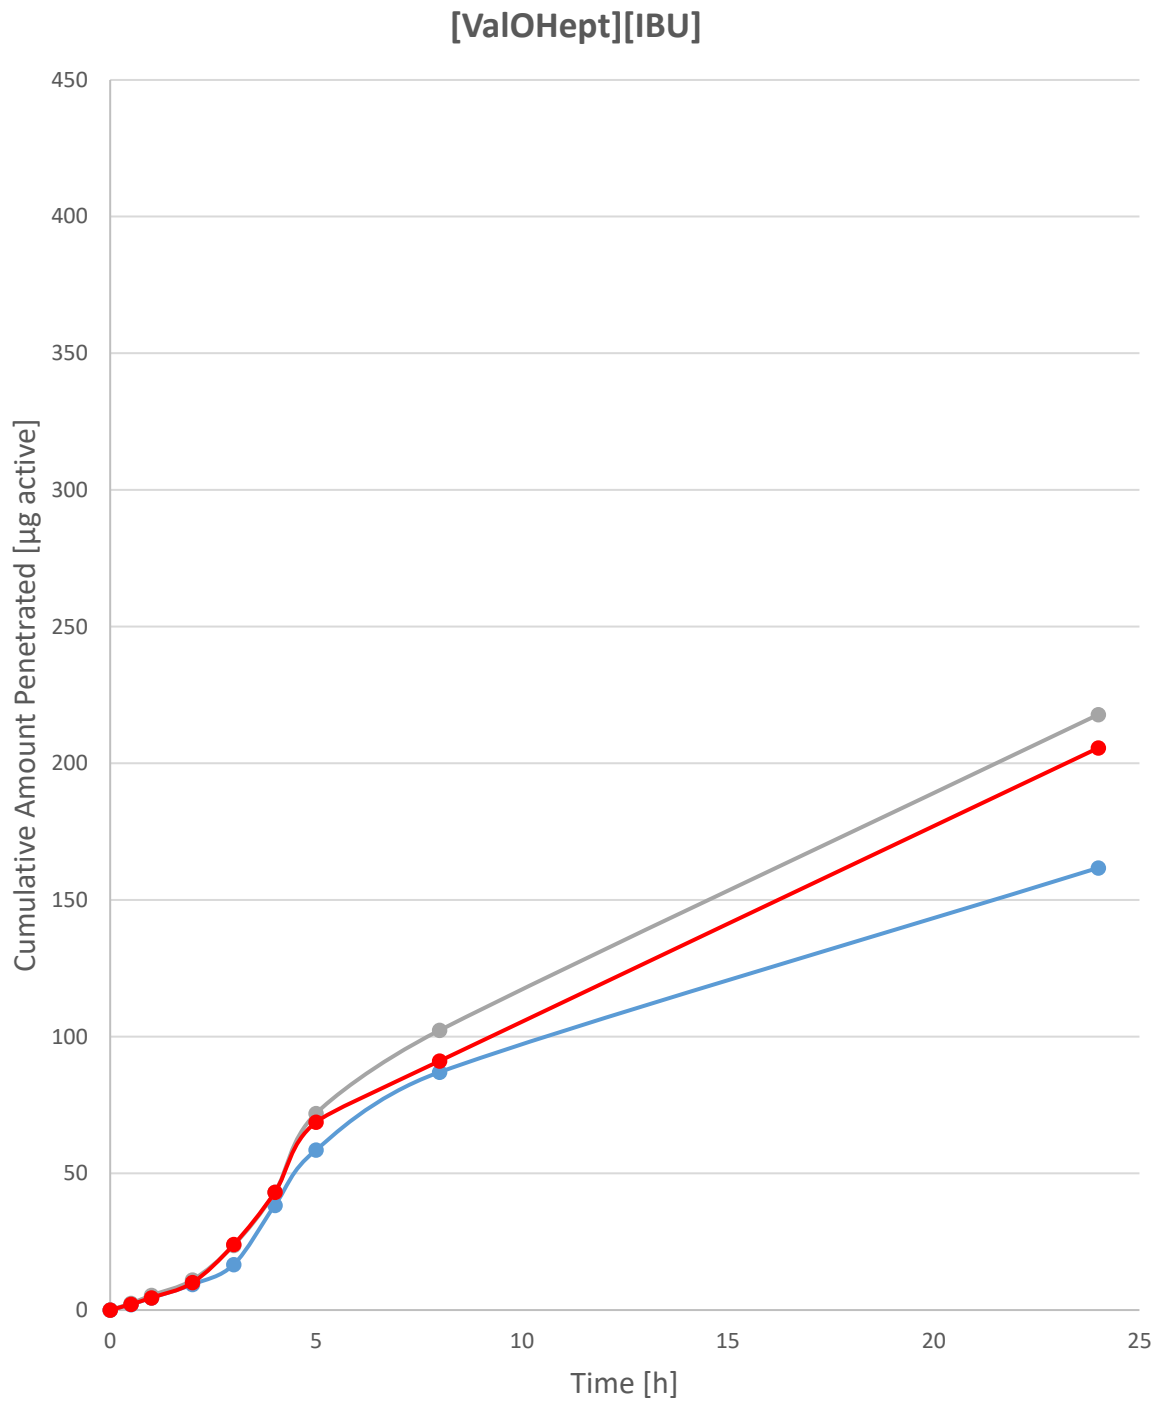

**Figure S54.** [ValOHept][IBU] diffusing through pig skin from alcoholic solution (blue – methanolic; gray – ethanolic; red – isopropanolic) to acceptor phase with pH 5.4

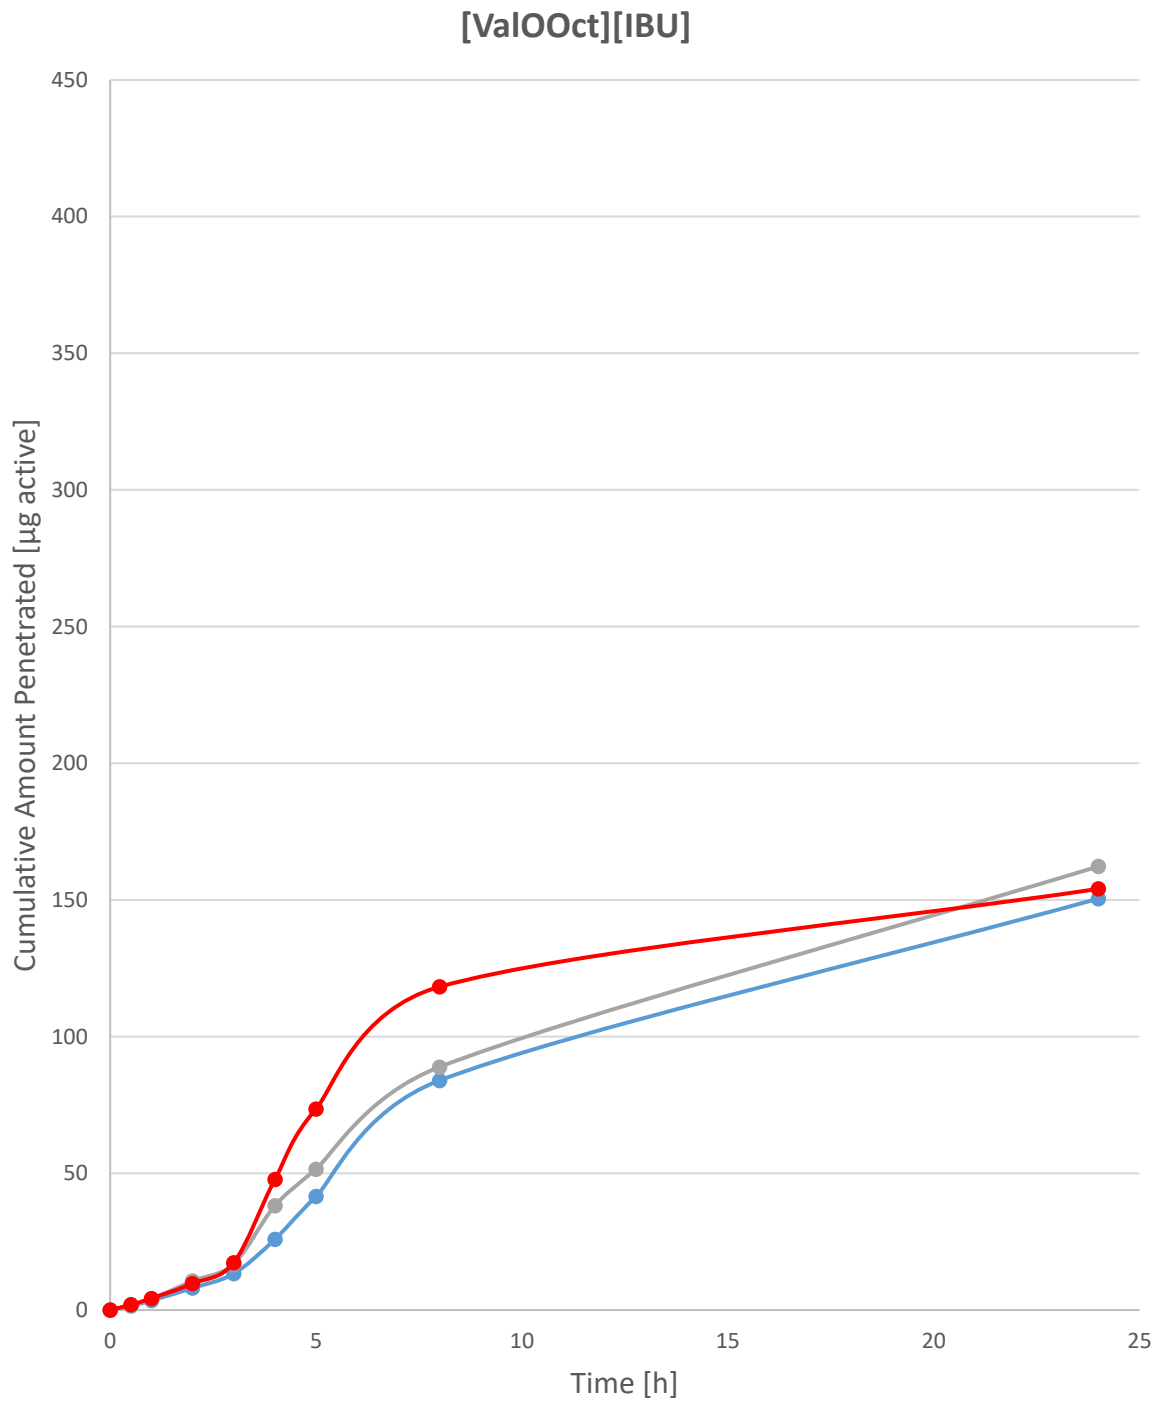

**Figure S55.** [ValOOct][IBU] diffusing through pig skin from alcoholic solution (blue – methanolic; gray – ethanolic; red – isopropanolic) to acceptor phase with pH 5.4

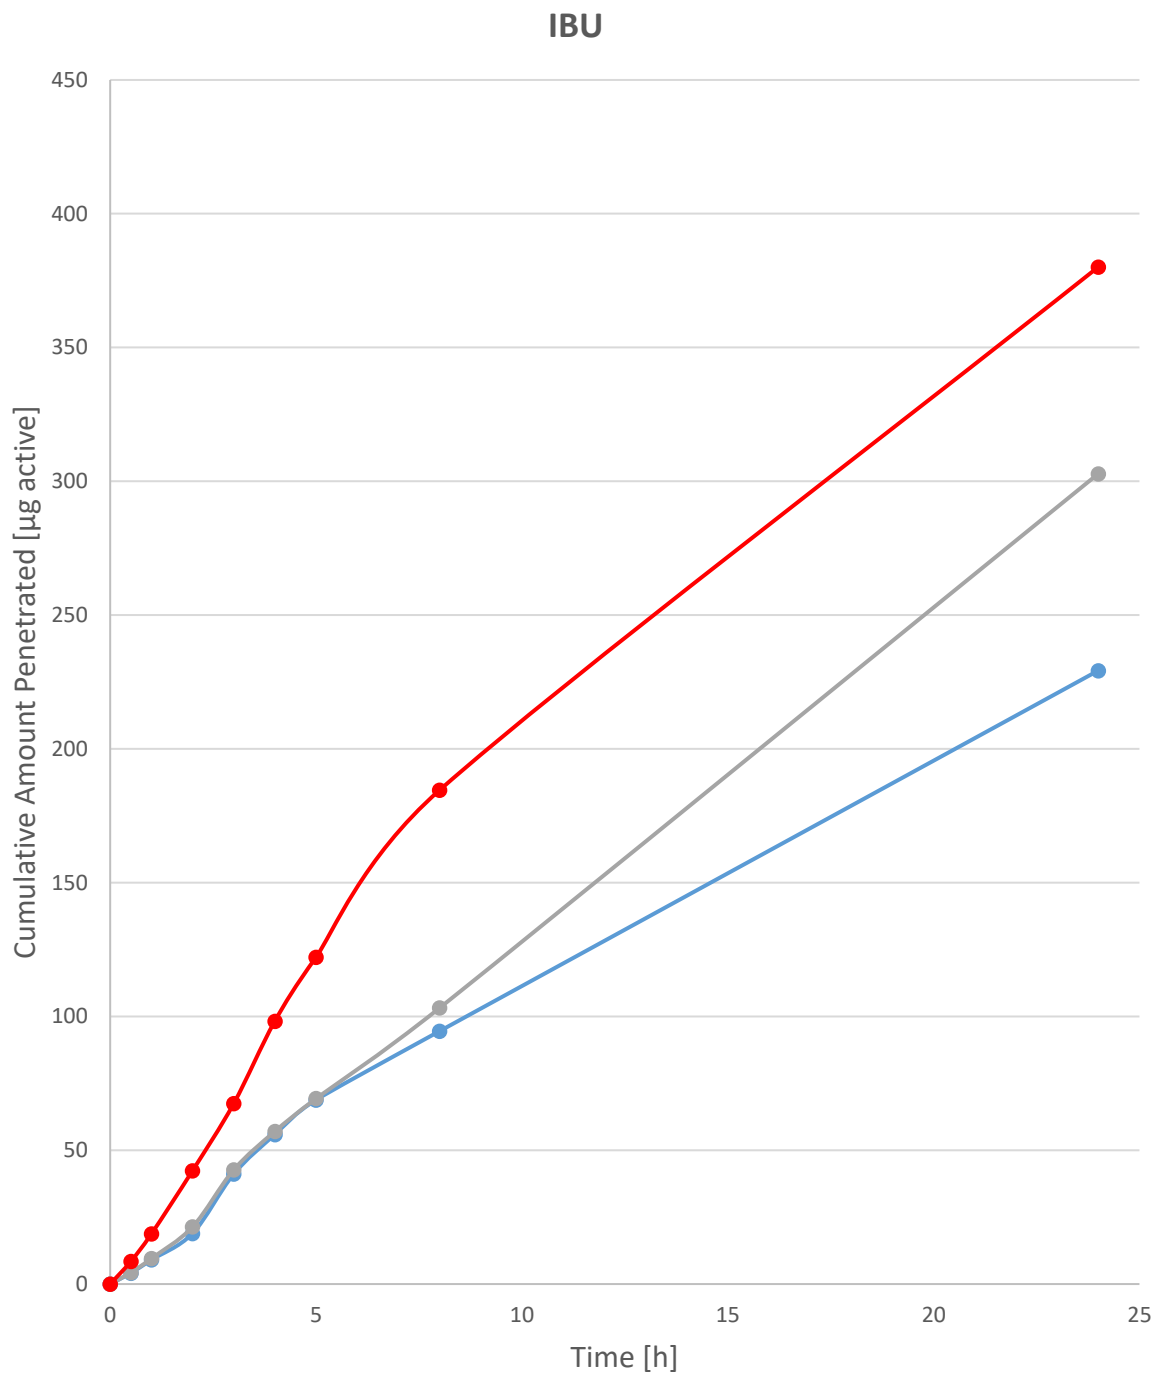

**Figure S56.** IBU diffusing through pig skin from alcoholic solution (blue – methanolic; gray – ethanolic; red – isopropanolic) to acceptor phase with pH 7.4

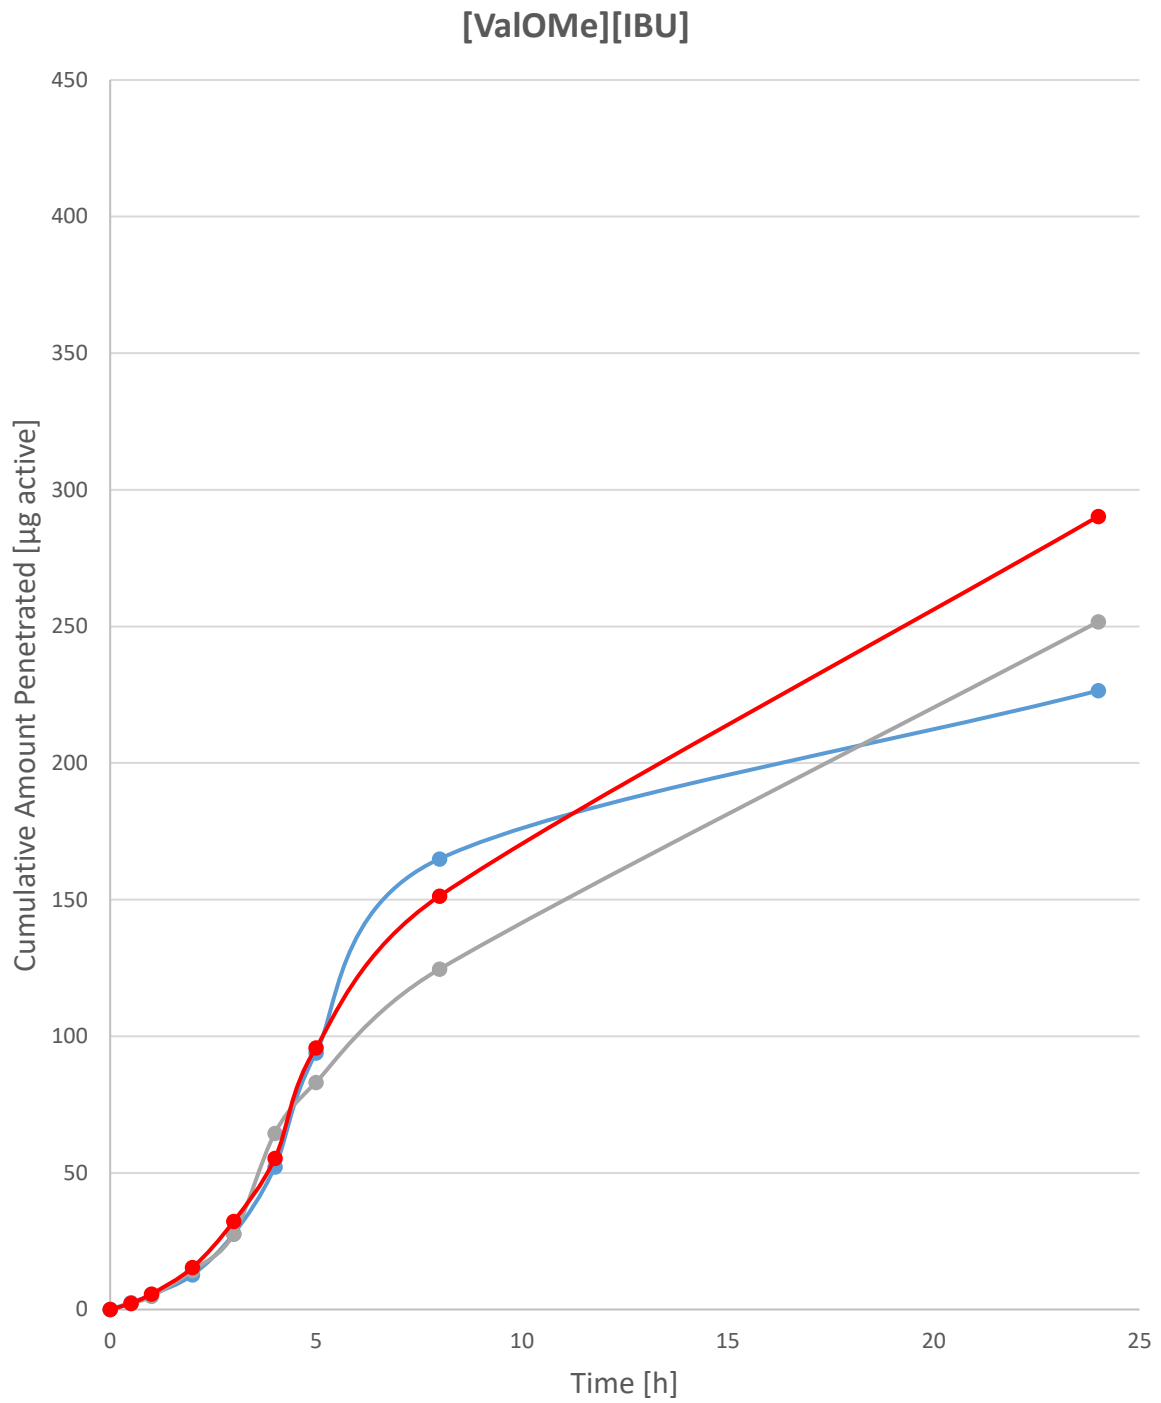

**Figure S57.** [ValOMe][IBU] diffusing through pig skin from alcoholic solution (blue – methanolic; gray – ethanolic; red – isopropanolic) to acceptor phase with pH 7.4





**Figure S58.** [ValOEt][IBU] diffusing through pig skin from alcoholic solution (blue – methanolic; gray – ethanolic; red – isopropanolic) to acceptor phase with pH 7.4

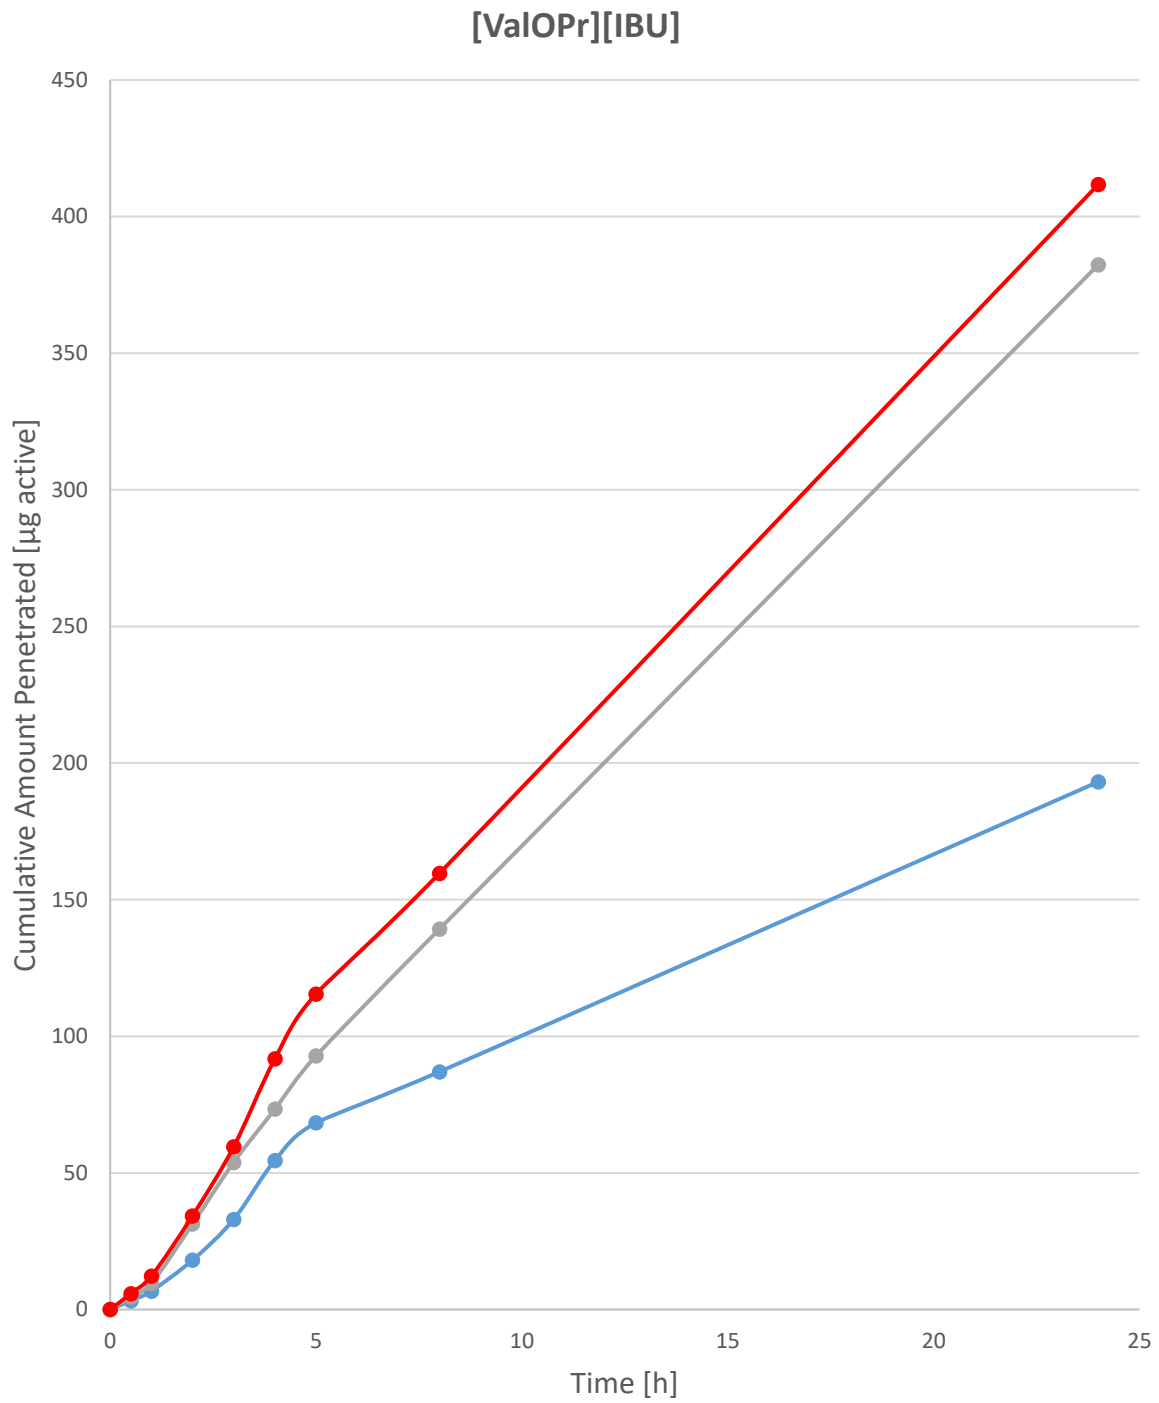

**Figure S59.** [ValOPr][IBU] diffusing through pig skin from alcoholic solution (blue – methanolic; gray – ethanolic; red – isopropanolic) to acceptor phase with pH 7.4

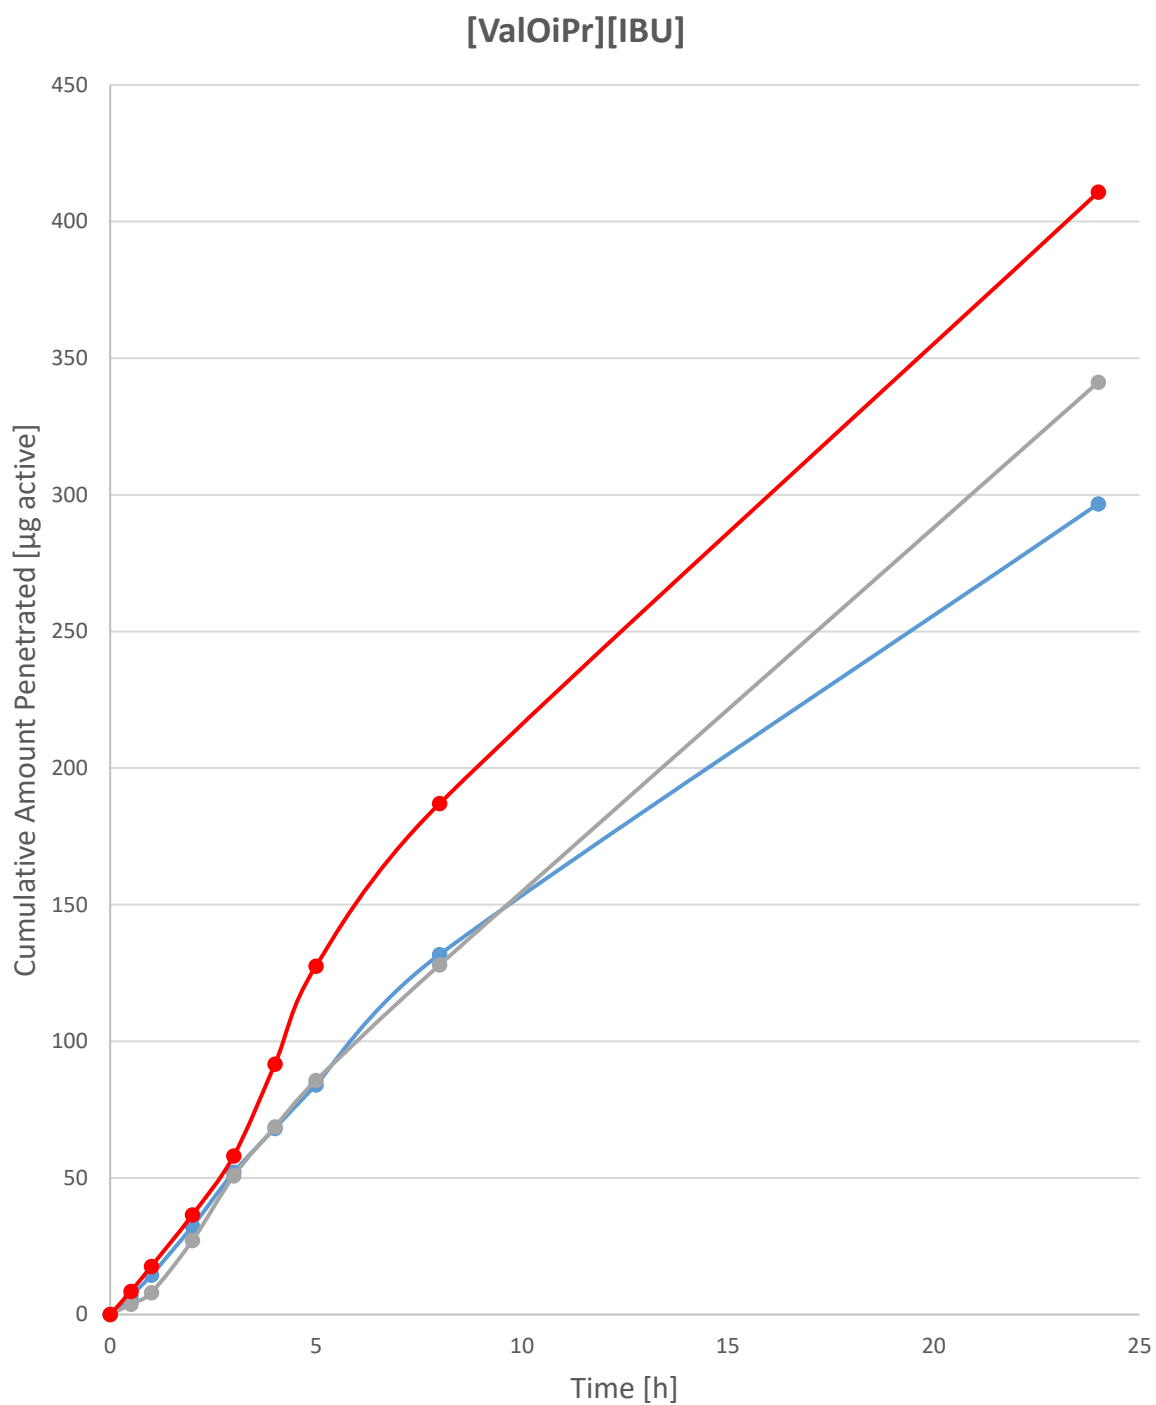

**Figure S60.** [ValOiPr][IBU] diffusing through pig skin from alcoholic solution (blue – methanolic; gray – ethanolic; red – isopropanolic) to acceptor phase with pH 7.4



**Figure S61.** [ValOBu][IBU] diffusing through pig skin from alcoholic solution (blue – methanolic; gray – ethanolic; red – isopropanolic) to acceptor phase with pH 7.4



**Figure S62.** [ValOAm][IBU] diffusing through pig skin from alcoholic solution (blue – methanolic; gray – ethanolic; red – isopropanolic) to acceptor phase with pH 7.4



**Figure S63.** [ValOHex][IBU] diffusing through pig skin from alcoholic solution (blue – methanolic; gray – ethanolic; red – isopropanolic) to acceptor phase with pH 7.4



**Figure S64.** [ValOHept][IBU] diffusing through pig skin from alcoholic solution (blue – methanolic; gray – ethanolic; red – isopropanolic) to acceptor phase with pH 7.4



**Figure S65.** [ValOOct][IBU] diffusing through pig skin from alcoholic solution (blue – methanolic; gray – ethanolic; red – isopropanolic) to acceptor phase with pH 7.4



## REFERENCES:

- (S1) Janus, E.; Ossowicz, P.; Klebeko, J.; Nowak, A.; Duchnik, W.; Kucharski, Ł.; Klimowicz, A. Enhancement of Ibuprofen Solubility and Skin Permeation by Conjugation with L-Valine Alkyl Esters. *RSC Adv.* **2020**, *10* (13), 7570–7584. <https://doi.org/10.1039/D0RA00100G>.
- (S2) Li, J.; Sha, Y. A Convenient Synthesis of Amino Acid Methyl Esters. *Molecules* **2008**, *13* (5), 1111–1119. <https://doi.org/10.3390/molecules13051111>.
- (S3) *Vogel's Textbook of Quantitative Chemical Analysis*, 5. ed., rev.; Vogel, A. I., Jeffery, G. H., Eds.; Longman: Harlow, 1989.
- (S4) Génies, C.; Jamin, E. L.; Debrauwer, L.; Zalko, D.; Person, E. N.; Eilstein, J.; Grégoire, S.; Schepky, A.; Lange, D.; Ellison, C.; Roe, A.; Salhi, S.; Cubberley, R.; Hewitt, N. J.; Rothe, H.; Klaric, M.; Duplan, H.; Jacques-Jamin, C. Comparison of the Metabolism of 10 Chemicals in Human and Pig Skin Explants. *J Appl Toxicol* **2018**, jat.3730. <https://doi.org/10.1002/jat.3730>.
- (S5) Čuříková, B. A.; Procházková, K.; Filková, B.; Diblíková, P.; Svoboda, J.; Kováčik, A.; Vávrová, K.; Zbytovská, J. Simplified Stratum Corneum Model Membranes for Studying the Effects of Permeation Enhancers. *International Journal of Pharmaceutics* **2017**, *534* (1–2), 287–296. <https://doi.org/10.1016/j.ijpharm.2017.10.038>.
- (S6) Khiao In, M.; Richardson, K. C.; Loewa, A.; Hedtrich, S.; Kaessmeyer, S.; Plendl, J. Histological and Functional Comparisons of Four Anatomical Regions of Porcine Skin with Human Abdominal Skin. *Anat Histol Embryol* **2019**, *48* (3), 207–217. <https://doi.org/10.1111/ahc.12425>.
- (S7) Jacobi, U.; Kaiser, M.; Toll, R.; Mangelsdorf, S.; Audring, H.; Otberg, N.; Sterry, W.; Lademann, J. Porcine Ear Skin: An in Vitro Model for Human Skin. *Skin Res Technol* **2007**, *13* (1), 19–24. <https://doi.org/10.1111/j.1600-0846.2006.00179.x>.
- (S8) Badran, M. M.; Kuntsche, J.; Fahr, A. Skin Penetration Enhancement by a Microneedle Device (Dermaroller®) in Vitro: Dependency on Needle Size and Applied Formulation. *European Journal of Pharmaceutical Sciences* **2009**, *36* (4–5), 511–523. <https://doi.org/10.1016/j.ejps.2008.12.008>.
- (S9) Davies, D. J.; Ward, R. J.; Heylings, J. R. Multi-Species Assessment of Electrical Resistance as a Skin Integrity Marker for in Vitro Percutaneous Absorption Studies. *Toxicology in Vitro* **2004**, *18* (3), 351–358. <https://doi.org/10.1016/j.tiv.2003.10.004>.
- (S10) Haq, A.; Michniak-Kohn, B. Effects of Solvents and Penetration Enhancers on Transdermal Delivery of Thymoquinone: Permeability and Skin Deposition Study. *Drug Delivery* **2018**, *25* (1), 1943–1949. <https://doi.org/10.1080/10717544.2018.1523256>.
- (S11) Kuntsche, J.; Bunjes, H.; Fahr, A.; Pappinen, S.; Rönkkö, S.; Suhonen, M.; Urtti, A. Interaction of Lipid Nanoparticles with Human Epidermis and an Organotypic Cell Culture Model. *International Journal of Pharmaceutics* **2008**, *354* (1–2), 180–195. <https://doi.org/10.1016/j.ijpharm.2007.08.028>.
- (S12) Simon, A.; Amaro, M. I.; Healy, A. M.; Cabral, L. M.; de Sousa, V. P. Comparative Evaluation of Rivastigmine Permeation from a Transdermal System in the Franz Cell Using Synthetic Membranes and Pig Ear Skin with in Vivo-in Vitro Correlation. *International Journal of Pharmaceutics* **2016**, *512* (1), 234–241. <https://doi.org/10.1016/j.ijpharm.2016.08.052>.
- (S13) Kopečná, M.; Macháček, M.; Prchalová, E.; Štěpánek, P.; Drašar, P.; Kotora, M.; Vávrová, K. Galactosyl Pentadecene Reversibly Enhances Transdermal and Topical Drug Delivery. *Pharm Res* **2017**, *34* (10), 2097–2108. <https://doi.org/10.1007/s11095-017-2214-3>.

- (S14) Ahad, A.; Aqil, Mohd.; Ali, A. The Application of Anethole, Menthone, and Eugenol in Transdermal Penetration of Valsartan: Enhancement and Mechanistic Investigation. *Pharmaceutical Biology* **2016**, *54* (6), 1042–1051. <https://doi.org/10.3109/13880209.2015.1100639>.
- (S15) Rozwadowski, Z. Deuterium Isotope Effects on <sup>13</sup>C Chemical Shifts of Lithium Salts of Schiff Bases Amino Acids. *Journal of Molecular Structure* **2005**, *753* (1–3), 127–131. <https://doi.org/10.1016/j.molstruc.2005.06.005>.
- (S16) Radeaglia, R. Breitmaier, E., Und Voelter, W.: <sup>13</sup>C-NMR Spectroscopy, Methods and Applications in Organic Chemistry. 2. Aufl., XIII, 344 S., 93 Abb., 114 Tab., Format. 17×24,3 Cm. Weinheim-New York: Verlag Chemie 1978. (Monographs in Modern Chemistry, Vol. 5). Leinen DM. *J. Prakt. Chem.* **1981**, *323* (6), 1016–1016. <https://doi.org/10.1002/prac.19813230630>.
- (S17) Ossowicz, P.; Janus, E.; Schroeder, G.; Rozwadowski, Z. Spectroscopic Studies of Amino Acid Ionic Liquid-Supported Schiff Bases. *Molecules* **2013**, *18* (5), 4986–5004. <https://doi.org/10.3390/molecules18054986>.
- (S18) Vairam, S.; Premkumar, T.; Govindarajan, S. Trimellitate Complexes of Divalent Transition Metals with Hydrazinium Cation: Thermal and Spectroscopic Studies. *J Therm Anal Calorim* **2010**, *100* (3), 955–960. <https://doi.org/10.1007/s10973-009-0459-8>.
- (S19) *Vogel's Textbook of Practical Organic Chemistry*, New. ed., 5. ed., rev. [Nachdr.]; Furniss, B. S., Vogel, A. I., Eds.; Pearson/Prentice Hall: Harlow, 2009.
- (S20) Reichardt, C.; Welton, T. *Solvents and Solvent Effects in Organic Chemistry*, 4th, updated and enl. ed ed.; Wiley-VCH: Weinheim, Germany, 2011.
